# Supplementary material
Source: ML conference proceedings conference paper supplement (https://openreview.net/forum?id=reZKq6hjOZ)
Supplement: supplementary_material [file attachment]

# Appendix

|     |                                                                                      |           |
|-----|--------------------------------------------------------------------------------------|-----------|
| 756 |                                                                                      |           |
| 757 |                                                                                      |           |
| 758 |                                                                                      |           |
| 759 | <b>A Related Works</b>                                                               | <b>16</b> |
| 760 |                                                                                      |           |
| 761 | <b>B Full List of Notations</b>                                                      | <b>17</b> |
| 762 |                                                                                      |           |
| 763 |                                                                                      |           |
| 764 | <b>C Proofs of Lemmas 1 and 2</b>                                                    | <b>17</b> |
| 765 | C.1 Proof of Lemma 1 . . . . .                                                       | 17        |
| 766 |                                                                                      |           |
| 767 | C.2 Lemma 2 and its Proof . . . . .                                                  | 18        |
| 768 |                                                                                      |           |
| 769 | <b>D Proof of Theorem 1</b>                                                          | <b>19</b> |
| 770 |                                                                                      |           |
| 771 | D.1 Step 0: Bounding term 1 – Initialization Error . . . . .                         | 20        |
| 772 | D.2 Step 1: Bounding term 2 – Score and Hessian Estimation Error . . . . .           | 21        |
| 773 | D.3 Step 2: Expressing Log-likelihood Ratio via Tilting Factor . . . . .             | 21        |
| 774 | D.4 Step 3: Conditional Expectation of $\zeta'_{t,t-1}$ under $P'_{t-1 t}$ . . . . . | 23        |
| 775 |                                                                                      |           |
| 776 | D.5 Step 4: Conditional Expectation of $\zeta'_{t,t-1}$ under $Q_{t-1 t}$ . . . . .  | 24        |
| 777 |                                                                                      |           |
| 778 | D.6 Step 5: Bounding term 3 – Reverse-step Error . . . . .                           | 26        |
| 779 |                                                                                      |           |
| 780 |                                                                                      |           |
| 781 | <b>E Proof of Corollary 1</b>                                                        | <b>27</b> |
| 782 |                                                                                      |           |
| 783 | <b>F Auxiliary Proofs for Theorem 1 and Corollary 1</b>                              | <b>27</b> |
| 784 |                                                                                      |           |
| 785 | F.1 Proof of Lemma 3 . . . . .                                                       | 27        |
| 786 | F.2 Proof of Lemma 4 . . . . .                                                       | 28        |
| 787 |                                                                                      |           |
| 788 | F.3 Proof of Corollary 2 . . . . .                                                   | 30        |
| 789 | F.4 Proof of Lemma 5 . . . . .                                                       | 30        |
| 790 |                                                                                      |           |
| 791 | F.5 Proof of Lemma 6 . . . . .                                                       | 31        |
| 792 | F.6 Proof of Lemma 7 . . . . .                                                       | 31        |
| 793 |                                                                                      |           |
| 794 | F.7 Proof of Lemma 8 . . . . .                                                       | 32        |
| 795 | F.8 Proof of Lemma 9 . . . . .                                                       | 34        |
| 796 |                                                                                      |           |
| 797 | F.9 Proof of Lemma 10 . . . . .                                                      | 35        |
| 798 | F.10 Proof of Lemma 11 . . . . .                                                     | 40        |
| 799 |                                                                                      |           |
| 800 | F.11 Proof of Corollary 3 . . . . .                                                  | 42        |
| 801 | F.12 Proof of Lemma 12 . . . . .                                                     | 43        |
| 802 |                                                                                      |           |
| 803 |                                                                                      |           |
| 804 | <b>G Proof of Theorems 2 to 4 and 5</b>                                              | <b>43</b> |
| 805 | G.1 Proof of Theorem 2 . . . . .                                                     | 43        |
| 806 | G.2 Proof of Theorem 3 . . . . .                                                     | 49        |
| 807 |                                                                                      |           |
| 808 | G.3 Theorem 5 and its Proof . . . . .                                                | 53        |
| 809 | G.4 Proof of Theorem 4 . . . . .                                                     | 54        |

|     |                                              |           |
|-----|----------------------------------------------|-----------|
| 810 | <b>H Auxiliary Proofs of Theorems 2 to 4</b> | <b>55</b> |
| 811 |                                              |           |
| 812 | H.1 Proof of Lemma 13 . . . . .              | 55        |
| 813 | H.2 Proof of Lemma 14 . . . . .              | 58        |
| 814 |                                              |           |
| 815 | H.3 Proof of Lemma 15 . . . . .              | 58        |
| 816 | H.4 Proof of Lemma 16 . . . . .              | 59        |
| 817 |                                              |           |
| 818 | H.5 Proof of Lemma 17 . . . . .              | 62        |
| 819 | H.6 Proof of Lemma 18 . . . . .              | 62        |
| 820 |                                              |           |

## A RELATED WORKS

**Theory on Regular DDPM Samplers:** Many works have explored the performance guarantees of regular DDPM models. Specifically, a number of studies perform analyses under the  $L^\infty$  score estimation error (De Bortoli et al., 2021; De Bortoli, 2022). Later, under  $L^2$  score estimation error, Lee et al. (2022) developed polynomial<sup>5</sup> bounds for distributions that have Lipschitz scores and satisfy log-Sobolev inequality. Soon after, Chen et al. (2023d); Lee et al. (2023) concurrently developed polynomial bounds for those smooth distributions having Lipschitz scores and those non-smooth distributions having bounded support using early stopping. Later, Chen et al. (2023a) improved the number of steps for those target distributions with finite second moment. Recently, the convergence result was further improved to linear dimensional dependency using stochastic localization (Benton et al., 2024a). In Conforti et al. (2023), by transforming the original process to the relative-score process, it is shown that linear dimensional dependency can also be achieved for those target distributions having finite relative Fisher information against a Gaussian distribution. In all the works above, the analysis technique is to discretize some continuous-time diffusion process to use SDE-type analyses. In Li et al. (2024c), by carefully design a typical set, polynomial-time guarantees are obtained directly for the discrete-time samplers under the  $L^2$  estimation error for target distributions having bounded support. Other than the works above, Pedrotti et al. (2023) analyzed a different sampling scheme (e.g., predictor-corrector), and Bruno et al. (2023); Gao et al. (2023); Gao & Zhu (2024) analyzed sampling errors using a different error measure (the Wasserstein-2 distance).

**Theory on Score Estimation:** In order to achieve an end-to-end analysis, several works developed sample complexity bounds to achieve the  $L^2$  score estimation error for a variety of distributions. To name a few, this includes results for those having bounded support (Oko et al., 2023), Gaussian mixture (Shah et al., 2023; Gatmiry et al., 2024; Chen et al., 2024), certain families of sub-Gaussian distributions (Cole & Lu, 2024; Zhang et al., 2024), high-dimensional graphical models (Mei & Wu, 2023), and those supported on a low-dimensional linear subspace (Chen et al., 2023b). More recently, Li et al. (2024e) considered the generalizability of the continuous-time diffusion models, and Wibisono et al. (2024) proposed a regularized score estimator that attains the minimax rate of estimating the scores.

**Other Theoretical Works:** Other than the works listed above and in Section 1.2, Gao & Zhu (2024) studied the ODE convergence for strongly-concave target distributions under Wasserstein-2 error. Cao et al. (2023) compared the performance of SDE and PF-ODE and investigated conditions where one might outperform the other. Besides PF-ODE, Cheng et al. (2023); Benton et al. (2024b); Jiao et al. (2024); Gao et al. (2024) provided guarantees for the closely-related flow-matching model, which learns a deterministic coupling between any two distributions. Chang et al. (2024) proposed a novel ODE for sampling from a conditional distribution. Lyu et al. (2024); Li et al. (2024b) provided convergence guarantees for the more recent consistency models (Song et al., 2023).

**Relationship to GENIE (Dockhorn et al., 2022):** To obtain higher-order scores, another method is to use automatic differentiation, as in GENIE (Dockhorn et al., 2022). There, higher-order score functions are used to accelerate the diffusion sampling process empirically. In particular, Dockhorn et al. (2022) shows that GENIE achieves better empirical performance than deterministic samplers such as DDIM (Song et al., 2021). Our paper theoretically justifies the accelerated empirical performance of Dockhorn et al. (2022) in the regime when the Hessian of  $\log q_t$  is well-estimated.

<sup>5</sup>By “polynomial” we mean that the number of steps has polynomial dependency on the score estimation error, along with other parameters.

## B FULL LIST OF NOTATIONS

For any two functions  $f(d, \delta, T)$  and  $g(d, \delta, T)$ , we write  $f(d, \delta, T) \lesssim g(d, \delta, T)$  (resp.  $f(d, \delta, T) \gtrsim g(d, \delta, T)$ ) for some universal constant (not depending on  $\delta, d$  or  $T$ )  $L < \infty$  (resp.  $L > 0$ ) if  $\limsup_{T \rightarrow \infty} |f(d, \delta, T)/g(d, \delta, T)| \leq L$  (resp.  $\liminf_{T \rightarrow \infty} |f(d, \delta, T)/g(d, \delta, T)| \geq L$ ). We write  $f(d, \delta, T) \asymp g(d, \delta, T)$  when both  $f(d, \delta, T) \lesssim g(d, \delta, T)$  and  $f(d, \delta, T) \gtrsim g(d, \delta, T)$  hold. Note that the dependency on  $\delta$  and  $d$  is retained with  $\lesssim, \gtrsim, \asymp$ . We write  $f(d, \delta, T) = O(g(T))$  (resp.  $f(d, \delta, T) = \Omega(g(T))$ ) if  $f(d, \delta, T) \lesssim L(d, \delta)g(T)$  (resp.  $f(d, \delta, T) \gtrsim L(d, \delta)g(T)$ ) holds for some  $L(d, \delta)$  (possibly depending on  $\delta$  and  $d$ ). We write  $f(d, \delta, T) = o(g(T))$  if  $\limsup_{T \rightarrow \infty} |f(d, \delta, T)/g(T)| = 0$ . We write  $f(d, \delta, T) = \tilde{O}(g(T))$  if  $f(d, \delta, T) = O(g(T)(\log g(T))^k)$  for some constant  $k$ . Note that the big- $O$  notation omits the dependency on  $\delta$  and  $d$ . In the asymptotic when  $\varepsilon^{-1} \rightarrow \infty$ , we write  $f(d, \varepsilon^{-1}) = \mathcal{O}(g(d, \varepsilon^{-1}))$  if  $f(d, \delta, \varepsilon^{-1}) \lesssim g(d, \delta, \varepsilon^{-1})(\log g(\varepsilon^{-1}))^k$  for some constant  $k$ . Unless otherwise specified, we write  $x^i (1 \leq i \leq d)$  as the  $i$ -th element of a vector  $x \in \mathbb{R}^d$  and  $[A]^{ij}$  as the  $(i, j)$ -th element of a matrix  $A$ . For a function  $f(x) : \mathbb{R}^d \rightarrow \mathbb{R}$ , we write  $\partial_i f(z)$  as a shorthand for  $\left. \frac{\partial}{\partial x^i} f(x) \right|_{x=z}$ , and similarly for higher moments. For matrices  $A, B$ ,  $\text{Tr}(A)$  is the trace of  $A$ , and  $A \preceq B$  means that  $B - A$  is positive semi-definite. For a positive integer  $n$ ,  $[n] := \{1, \dots, n\}$ .

## C PROOFS OF LEMMAS 1 AND 2

In this section, we provide lemmas and proofs related to Hessian estimation.

### C.1 PROOF OF LEMMA 1

The idea is similar to score matching. Define  $v'_\theta(x) := v_\theta(x) - \frac{1}{1-\bar{\alpha}_t} I_d$ . For each  $i, j \in [d]$ ,

$$\begin{aligned} & \mathbb{E}_{X_t \sim Q_t} \left( v_\theta^{ij}(X_t) - \left( \frac{\partial_{ij}^2 q_t(X_t)}{q_t(X_t)} + \frac{\mathbf{1}\{i=j\}}{1-\bar{\alpha}_t} \right) \right)^2 \\ &= \mathbb{E}_{X_t \sim Q_t} \left( [v'_\theta(X_t)]^{ij} - \frac{\partial_{ij}^2 q_t(X_t)}{q_t(X_t)} \right)^2 \\ &= \mathbb{E}_{X_t \sim Q_t} ([v'_\theta(X_t)]^{ij})^2 - 2 \mathbb{E}_{X_t \sim Q_t} \left[ [v'_\theta(X_t)]^{ij} \frac{\partial_{ij}^2 q_t(X_t)}{q_t(X_t)} \right] + \text{const} \\ &= \mathbb{E}_{X_t \sim Q_t} ([v'_\theta(X_t)]^{ij})^2 - 2 \int [v'_\theta(x_t)]^{ij} \partial_{ij}^2 q_t(x_t) dx_t + \text{const} \end{aligned}$$

where const denotes terms that are independent of  $\theta$ , and

$$\begin{aligned} & \int [v'_\theta(x_t)]^{ij} \partial_{ij}^2 q_t(x_t) dx_t \\ &= \int [v'_\theta(x_t)]^{ij} \int \partial_{ij}^2 q_{t|0}(x_t|x_0) dQ_0(x_0) dx_t \\ &= \int \int q_{t|0}(x_t|x_0) [v'_\theta(x_t)]^{ij} \frac{\partial_{ij}^2 q_{t|0}(x_t|x_0)}{q_{t|0}(x_t|x_0)} dQ_0(x_0) dx_t \\ &\stackrel{(i)}{=} \int \int q_{t|0}(x_t|x_0) [v'_\theta(x_t)]^{ij} (\partial_{ij}^2 \log q_{t|0}(x_t|x_0) + \partial_i \log q_{t|0}(x_t|x_0) \partial_j \log q_{t|0}(x_t|x_0)) dQ_0(x_0) dx_t \\ &= \int \int q_{t|0}(x_t|x_0) [v'_\theta(x_t)]^{ij} \left( -\frac{\mathbf{1}\{i=j\}}{1-\bar{\alpha}_t} + \frac{x_t^i - \sqrt{\bar{\alpha}_t} x_0^i}{1-\bar{\alpha}_t} \cdot \frac{x_t^j - \sqrt{\bar{\alpha}_t} x_0^j}{1-\bar{\alpha}_t} \right) dQ_0(x_0) dx_t \\ &\stackrel{(ii)}{=} \mathbb{E}_{\substack{(X_0, \bar{W}_t) \sim Q_0 \otimes \mathcal{N}(0, I_d) \\ X_t = \sqrt{\bar{\alpha}_t} X_0 + \sqrt{1-\bar{\alpha}_t} \bar{W}_t}} \left[ [v'_\theta(X_t)]^{ij} \left( -\frac{\mathbf{1}\{i=j\}}{1-\bar{\alpha}_t} + \frac{1}{1-\bar{\alpha}_t} \bar{W}_t^i \bar{W}_t^j \right) \right] \end{aligned}$$

where (i) follows because for any function  $f(x)$  we have  $\partial_{ij}^2 \log f(x) = \frac{\partial_{ij}^2 f(x)}{f(x)} - (\partial_i \log f(x))(\partial_j \log f(x))$ , and (ii) follows because  $x_t = \sqrt{\bar{\alpha}_t} x_0 + \sqrt{1-\bar{\alpha}_t} \bar{w}_t$ . Therefore,

$$\mathbb{E}_{X_t \sim Q_t} \left( v_\theta^{ij}(X_t) - \left( \frac{\partial_{ij}^2 q_t(X_t)}{q_t(X_t)} + \frac{\mathbf{1}\{i=j\}}{1-\bar{\alpha}_t} \right) \right)^2$$

$$\begin{aligned}
&= \mathbb{E}_{\substack{(X_0, \bar{W}_t) \sim Q_0 \otimes \mathcal{N}(0, I_d) \\ X_t = \sqrt{\bar{\alpha}_t} X_0 + \sqrt{1 - \bar{\alpha}_t} \bar{W}_t}} \left( [v'_\theta(X_t)]^{ij} - \left( -\frac{\mathbb{1}\{i=j\}}{1 - \bar{\alpha}_t} + \frac{1}{1 - \bar{\alpha}_t} \bar{W}_t^i \bar{W}_t^j \right) \right)^2 + \text{const} \\
&= \mathbb{E}_{\substack{(X_0, \bar{W}_t) \sim Q_0 \otimes \mathcal{N}(0, I_d) \\ X_t = \sqrt{\bar{\alpha}_t} X_0 + \sqrt{1 - \bar{\alpha}_t} \bar{W}_t}} \left( [v_\theta(X_t)]^{ij} - \frac{1}{1 - \bar{\alpha}_t} \bar{W}_t^i \bar{W}_t^j \right)^2 + \text{const}
\end{aligned}$$

and the result follows immediately after we sum up over  $i, j \in [d]$ .

## C.2 LEMMA 2 AND ITS PROOF

The following lemma provides sufficient conditions such that the  $H_t$  in (8) satisfies Assumption 3.

**Lemma 2.** *Under Assumption 5, with the  $\alpha_t$  defined in Definition 1, suppose that  $v_t$  and  $s_t$  satisfy, as  $T \rightarrow \infty$ ,*

$$\frac{1}{T} \sum_{t=1}^T \mathbb{E}_{X_t \sim Q_t} \left\| v_t(X_t) - \left( \frac{\nabla^2 q_t(X_t)}{q_t(X_t)} + \frac{1}{1 - \bar{\alpha}_t} I_d \right) \right\|_F^2 = \tilde{O}(T^{-1}), \quad (11)$$

$$\max_{1 \leq t \leq T} (1 - \alpha_t)^{-2} \sqrt{\mathbb{E}_{X_t \sim Q_t} \|s_t(X_t) - \nabla \log q_t(X_t)\|^4} = \tilde{O}(1). \quad (12)$$

Also suppose that the  $H_t$  defined in (8) satisfies  $\sup_{\ell \geq 1} \left( \mathbb{E}_{X_t \sim Q_t} \|H_t(X_t)\|^\ell \right)^{1/\ell} = \tilde{O}(1)$ . Then, the  $H_t$  and the  $s_t$  from score matching (Song & Ermon, 2019) satisfy Assumption 3.

*Proof of Lemma 2.* The condition on the score estimation error in Assumption 3 is immediately satisfied using Jensen’s inequality. We next focus on the condition on the Hessian estimation. Recall that

$$H_t(x) = v_t(x) - \frac{1}{1 - \bar{\alpha}_t} I_d - s_t(x) s_t^\top(x).$$

The goal is to show that  $H_t$  is close to  $\nabla^2 \log q_t$  (i.e., the second relationship in Assumption 3). Given that  $\nabla^2 \log q_t(x) = \frac{\nabla^2 q_t(x)}{q_t(x)} - (\nabla \log q_t(x))(\nabla \log q_t(x))^\top$ , the key is to control the error incurred by  $s_t(x) s_t^\top(x)$ , which is

$$\begin{aligned}
&\mathbb{E}_{X_t \sim Q_t} \sum_{i,j=1}^d \left( s_t^i(X_t) s_t^j(X_t) - [\nabla \log q_t(X_t)]^i [\nabla \log q_t(X_t)]^j \right)^2 \\
&= \mathbb{E}_{X_t \sim Q_t} \sum_{i,j=1}^d \left( (s_t^i(X_t) - [\nabla \log q_t(X_t)]^i) s_t^j(X_t) + [\nabla \log q_t(X_t)]^i (s_t^j(X_t) - [\nabla \log q_t(X_t)]^j) \right)^2 \\
&\stackrel{(i)}{\leq} 2 \mathbb{E}_{X_t \sim Q_t} \sum_{i,j=1}^d (s_t^i(X_t) - [\nabla \log q_t(X_t)]^i)^2 (s_t^j(X_t))^2 + ([\nabla \log q_t(X_t)]^i)^2 (s_t^j(X_t) - [\nabla \log q_t(X_t)]^j)^2 \\
&= 2 \mathbb{E}_{X_t \sim Q_t} \left[ \|s_t(X_t) - \nabla \log q_t(X_t)\|^2 (\|\nabla \log q_t(X_t)\|^2 + \|s_t(X_t)\|^2) \right]
\end{aligned}$$

where (i) follows because  $(a + b)^2 = a^2 + b^2 + 2ab \leq 2a^2 + 2b^2$ . To continue, we use the Cauchy-Schwartz inequality and obtain

$$\begin{aligned}
&\mathbb{E}_{X_t \sim Q_t} \|s_t(X_t) s_t^\top(X_t) - (\nabla \log q_t(X_t))(\nabla \log q_t(X_t))^\top\|_F^2 \\
&\leq 2 \sqrt{\mathbb{E}_{X_t \sim Q_t} \|s_t(X_t) - \nabla \log q_t(X_t)\|^4} \sqrt{2 \mathbb{E}_{X_t \sim Q_t} \left[ \|\nabla \log q_t(X_t)\|^4 + \|s_t(X_t)\|^4 \right]}.
\end{aligned}$$

Here the second term has that

$$\begin{aligned}
\mathbb{E}[\|s_t(X_t)\|^4] &\leq 8 \mathbb{E}[\|s_t(X_t) - \nabla \log q_t(X_t)\|^4] + 8 \mathbb{E}[\|\nabla \log q_t(X_t)\|^4] \\
&\lesssim \mathbb{E}[\|\nabla \log q_t(X_t)\|^4].
\end{aligned}$$

Therefore,

$$\frac{1}{T} \sum_{t=1}^T \mathbb{E}_{X_t \sim Q_t} \|H_t(X_t) - \nabla^2 \log q_t(X_t)\|_F^2$$

$$\begin{aligned}
&\leq \frac{1}{T} \sum_{t=1}^T \mathbb{E}_{X_t \sim Q_t} \left\| v_\theta(X_t) - \left( \frac{\nabla^2 q_t(X_t)}{q_t(X_t)} + \frac{1}{1 - \bar{\alpha}_t} I_d \right) \right\|_F^2 \\
&\quad + \frac{1}{T} \sum_{t=1}^T \mathbb{E}_{X_t \sim Q_t} \| s_t(X_t) s_t^\top(X_t) - (\nabla \log q_t(X_t)) (\nabla \log q_t(X_t))^\top \|_F^2 \\
&\lesssim \frac{1}{T} \sum_{t=1}^T \mathbb{E}_{X_t \sim Q_t} \left\| v_\theta(X_t) - \left( \frac{\nabla^2 q_t(X_t)}{q_t(X_t)} + \frac{1}{1 - \bar{\alpha}_t} I_d \right) \right\|_F^2 \\
&\quad + \frac{1}{T} \sum_{t=1}^T \sqrt{\mathbb{E}_{X_t \sim Q_t} \| s_t(X_t) - \nabla \log q_t(X_t) \|^4} \sqrt{\mathbb{E}_{X_t \sim Q_t} \| \nabla \log q_t(X_t) \|^4} \\
&\stackrel{(ii)}{=} \frac{1}{T} \sum_{t=1}^T \mathbb{E}_{X_t \sim Q_t} \left\| v_\theta(X_t) - \left( \frac{\nabla^2 q_t(X_t)}{q_t(X_t)} + \frac{1}{1 - \bar{\alpha}_t} I_d \right) \right\|_F^2 \\
&\quad + \tilde{O} \left( \sqrt{\frac{1}{T} \sum_{t=1}^T (1 - \alpha_t)^2 \mathbb{E}_{X_t \sim Q_t} \| \nabla \log q_t(X_t) \|^4} \right) \\
&\stackrel{(iii)}{=} \frac{1}{T} \sum_{t=1}^T \mathbb{E}_{X_t \sim Q_t} \left\| v_\theta(X_t) - \left( \frac{\nabla^2 q_t(X_t)}{q_t(X_t)} + \frac{1}{1 - \bar{\alpha}_t} I_d \right) \right\|_F^2 + \tilde{O}(T^{-1})
\end{aligned}$$

where (ii) follows from (12) using the fact that  $\frac{1}{T} \sum_{t=1}^T \sqrt{a_t} \leq \sqrt{\frac{1}{T} \sum_{t=1}^T a_t}$  by Jensen's inequality, and (iii) follows under Assumption 5. Combining this with (11), we finally get

$$\frac{1}{T} \sum_{t=1}^T \mathbb{E}_{X_t \sim Q_t} \left\| v_t(X_t) - \left( \frac{\nabla^2 q_t(X_t)}{q_t(X_t)} + \frac{1}{1 - \bar{\alpha}_t} I_d \right) \right\|_F^2 = \tilde{O}(T^{-1})$$

and thus the second relationship in Assumption 3 is satisfied. The proof is now complete.  $\square$

## D PROOF OF THEOREM 1

Instead of Assumption 5, we will prove Theorem 1 under the following more general condition.

**Assumption 5** (Regular Partial Derivatives+). For all  $t \geq 1$ ,  $\ell \geq 1$ , and  $\mathbf{a} \in [d]^p$  such that  $|\mathbf{a}| = p \geq 1$ ,

$$\begin{aligned}
(1 - \alpha_t)^{p\ell/2} \mathbb{E}_{X_t \sim Q_t} |\partial_{\mathbf{a}}^p \log q_t(X_t)|^\ell &= \tilde{O} \left( (1 - \alpha_t)^{p\ell/2} \right), \\
(1 - \alpha_t)^{p\ell/2} \mathbb{E}_{X_t \sim Q_t} |\partial_{\mathbf{a}}^p \log q_{t-1}(\mu_t(X_t))|^\ell &= \tilde{O} \left( (1 - \alpha_t)^{p\ell/2} \right).
\end{aligned}$$

When  $q_0$  does not exist, this is required only for  $t \geq 2$ .

Obviously, Assumption 5 implies Assumption 5 for any  $\alpha_t$ .

To begin the proof of Theorem 1, note that

$$\begin{aligned}
\text{KL}(Q \|\hat{P}') &= \mathbb{E}_{X_0, \dots, X_T \sim Q} \left[ \log \frac{q(X_0, \dots, X_T)}{\hat{p}'(X_0, \dots, X_T)} \right] \\
&\stackrel{(i)}{=} \mathbb{E}_{X_0, \dots, X_T \sim Q} \left[ \log \frac{q_0(X_0) \prod_{t=1}^T q_{t|t-1}(X_t | X_{t-1})}{\hat{p}'(X_0, \dots, X_T)} \right] \\
&\stackrel{(ii)}{=} \mathbb{E}_{X_0, \dots, X_T \sim Q} \left[ \log \frac{q_0(X_0) \prod_{t=1}^T q_{t|t-1}(X_t | X_{t-1})}{\hat{p}'_0(X_0) \prod_{t=1}^T \hat{p}'_{t|t-1}(X_t | X_{t-1})} \right] \\
&= \mathbb{E}_{X_0 \sim Q_0} \left[ \log \frac{q_0(X_0)}{\hat{p}'_0(X_0)} \right] + \sum_{t=1}^T \mathbb{E}_{X_{t-1}, X_t \sim Q_{t-1, t}} \left[ \log \frac{q_{t|t-1}(X_t | X_{t-1})}{\hat{p}'_{t|t-1}(X_t | X_{t-1})} \right]
\end{aligned}$$

$$\begin{aligned}
&= \mathbb{E}_{X_0 \sim Q_0} \left[ \log \frac{q_0(X_0)}{\hat{p}'_0(X_0)} \right] + \sum_{t=1}^T \mathbb{E}_{X_{t-1} \sim Q_{t-1}} \left[ \mathbb{E}_{X_t \sim Q_{t|t-1}} \left[ \log \frac{q_{t|t-1}(X_t|X_{t-1})}{\hat{p}'_{t|t-1}(X_t|X_{t-1})} \right] \right] \\
&= \text{KL}(Q_0 || \hat{P}'_0) + \sum_{t=1}^T \mathbb{E}_{X_{t-1} \sim Q_{t-1}} \left[ \text{KL}(Q_{t|t-1}(\cdot|X_{t-1}) || \hat{P}'_{t|t-1}(\cdot|X_{t-1})) \right].
\end{aligned}$$

Here (i) holds because of the Markov property of the forward process. We explain (ii) below. By the backward Markov property of the reverse process, for any  $t \geq 1$ , given  $X_{t-1} = x_{t-1}$ , each of  $X_{t-2}, \dots, X_0$  is independent with  $X_t$ . This implies that

$$\hat{p}'_{t|t-1, \dots, 0}(x_t | x_{t-1}, \dots, x_0) = \hat{p}'_{t|t-1}(x_t | x_{t-1}), \quad \forall t \geq 1.$$

Thus,  $\hat{p}'(x_0, \dots, x_T) = \hat{p}'_0(x_0) \prod_{t=1}^T \hat{p}'_{t|t-1}(x_t | x_{t-1})$ . In other words,  $X_0, \dots, X_t$  is also forward Markov under  $\hat{P}'$ .

Following from similar arguments,

$$\text{KL}(Q || \hat{P}') = \text{KL}(Q_T || \hat{P}'_T) + \sum_{t=1}^T \mathbb{E}_{X_t \sim Q_t} \left[ \text{KL}(Q_{t-1|t}(\cdot|X_t) || \hat{P}'_{t-1|t}(\cdot|X_t)) \right].$$

Since KL-divergence is non-negative, an upper bound on  $\text{KL}(Q_0 || \hat{P}'_0)$  is given by

$$\begin{aligned}
&\text{KL}(Q_0 || \hat{P}'_0) \\
&= \text{KL}(Q_T || \hat{P}'_T) + \sum_{t=1}^T \mathbb{E}_{X_t \sim Q_t} \left[ \text{KL}(Q_{t-1|t}(\cdot|X_t) || \hat{P}'_{t-1|t}(\cdot|X_t)) \right] \\
&\quad - \sum_{t=1}^T \mathbb{E}_{X_{t-1} \sim Q_{t-1}} \left[ \text{KL}(Q_{t|t-1}(\cdot|X_{t-1}) || \hat{P}'_{t|t-1}(\cdot|X_{t-1})) \right] \\
&\leq \text{KL}(Q_T || \hat{P}'_T) + \sum_{t=1}^T \mathbb{E}_{X_t \sim Q_t} \left[ \text{KL}(Q_{t-1|t}(\cdot|X_t) || \hat{P}'_{t-1|t}(\cdot|X_t)) \right] \\
&= \underbrace{\mathbb{E}_{X_T \sim Q_T} \left[ \log \frac{q_T(X_T)}{p'_T(X_T)} \right]}_{\text{Term 1: initialization error}} + \underbrace{\sum_{t=1}^T \mathbb{E}_{X_t, X_{t-1} \sim Q_{t,t-1}} \left[ \log \frac{p'_{t-1|t}(X_{t-1}|X_t)}{\hat{p}'_{t-1|t}(X_{t-1}|X_t)} \right]}_{\text{Term 2: estimation error}} \\
&\quad + \underbrace{\sum_{t=1}^T \mathbb{E}_{X_t, X_{t-1} \sim Q_{t,t-1}} \left[ \log \frac{q_{t-1|t}(X_{t-1}|X_t)}{p'_{t-1|t}(X_{t-1}|X_t)} \right]}_{\text{Term 3: reverse-step error}}. \tag{13}
\end{aligned}$$

The last equality holds because  $\hat{p}'_T = p'_T$ .

Next, we bound the above three terms separately in a few steps.

#### D.1 STEP 0: BOUNDING TERM 1 – INITIALIZATION ERROR

**Lemma 3.** Suppose  $\bar{\alpha}_T \searrow 0$  as  $T \rightarrow \infty$ . Then, under Assumption 1,

$$\mathbb{E}_{X_T \sim Q_T} \left[ \log \frac{q_T(X_T)}{p'_T(X_T)} \right] \leq \frac{1}{2} M_2 \bar{\alpha}_T d + O(\bar{\alpha}_T^2), \quad \text{as } T \rightarrow \infty.$$

*Remark 1.* Under Assumption 1, if the noise schedule satisfies Definition 1, we have

$$\mathbb{E}_{X_T \sim Q_T} \left[ \log \frac{q_T(X_T)}{p'_T(X_T)} \right] = o(T^{-2}).$$

*Proof.* See Appendix F.1. □

We now introduce the following notation for analyzing the estimation error and the reverse-step error for the accelerated sampler.

**Definition 2** (Big-O in  $\mathcal{L}^r$  space). For a random variable  $Z_T$ , we say that  $Z_T(x) = O_{\mathcal{L}^r(Q)}(1)$  if  $(\mathbb{E}_{X \sim Q} |Z_T(X)|^r)^{1/r} = O(1)$  for all  $r \geq 1$  as  $T \rightarrow \infty$ .

One property is that if  $Z_T(x) = O_{\mathcal{L}^r(Q)}(1)$  then  $\mathbb{E}_{X \sim Q} |Z_T(X)| = O(1)$ . Another property is that if  $Z_1 = O_{\mathcal{L}^r(Q)}(a_T)$  and  $Z_2 = O_{\mathcal{L}^r(Q)}(b_T)$  for all  $r \geq 1$ , applying Cauchy-Schwartz inequality we get, for all  $r \geq 1$ ,

$$(\mathbb{E} |Z_1 Z_2|^r)^{1/r} \leq (\mathbb{E} Z_1^{2r} \mathbb{E} Z_2^{2r})^{1/(2r)} = O(a_T b_T),$$

which implies that  $O_{\mathcal{L}^r(Q)}(a_T) O_{\mathcal{L}^r(Q)}(b_T) = O_{\mathcal{L}^r(Q)}(a_T b_T)$ . Now, with this notation, the regularity condition on  $H_t$  can be written as

$$(1 - \alpha_t) \|H_t(X_t)\| = \tilde{O}_{\mathcal{L}^r(Q_t)}(1 - \alpha_t), \quad \forall r \geq 1.$$

Also, Assumption 5 can be equivalently written as,  $\forall r \geq 1$ ,

$$(1 - \alpha_t)^{p/2} |\partial_{\alpha}^p \log q_t(X_t)| = \tilde{O}_{\mathcal{L}^r(Q_t)}((1 - \alpha_t)^{p/2}),$$

$$(1 - \alpha_t)^{p/2} |\partial_{\alpha}^p \log q_{t-1}(\mu_t(X_t))| = \tilde{O}_{\mathcal{L}^r(Q_t)}((1 - \alpha_t)^{p/2}).$$

## D.2 STEP 1: BOUNDING TERM 2 – SCORE AND HESSIAN ESTIMATION ERROR

We first bound the estimation error, which includes the errors that come from the score and the Hessian estimation. In particular, Assumption 5 guarantees that all higher Taylor terms are well controlled in expectation over  $X_t \sim Q_t$ .

**Lemma 4.** *Under Assumptions 3 and 4, with the  $\alpha_t$  satisfying Definition 1, we have*

$$\sum_{t=1}^T \mathbb{E}_{X_t, X_{t-1} \sim Q_{t,t-1}} \left[ \log \frac{p'_{t-1|t}(X_{t-1}|X_t)}{\tilde{p}'_{t-1|t}(X_{t-1}|X_t)} \right] \lesssim (\log T) \varepsilon^2 + \frac{\log^2 T}{T} \varepsilon_H^2.$$

*Remark 2.* Under Assumption 3, Lemma 4 guarantees that

$$\sum_{t=1}^T \mathbb{E}_{X_t, X_{t-1} \sim Q_{t,t-1}} \left[ \log \frac{p'_{t-1|t}(X_{t-1}|X_t)}{\tilde{p}'_{t-1|t}(X_{t-1}|X_t)} \right] = \tilde{O}\left(\frac{1}{T^2}\right).$$

*Proof.* See Appendix F.2. □

Before we proceed to the reverse-step error, we provide the following lemma to provide an upper bound when we use the  $\tilde{\Sigma}_t$  and its estimate according to (9).

**Corollary 2.** *Under the same conditions of Lemma 4, the upper bound in Lemma 4 on the estimation error still holds with the slightly perturbed  $\tilde{\Sigma}_t$  provided in (9).*

*Proof.* See Appendix F.3. □

## D.3 STEP 2: EXPRESSING LOG-LIKELIHOOD RATIO VIA TILTING FACTOR

Next we focus on the reverse-step error for the accelerated process. Recall that  $Q_0$  is smooth under Assumption 2. We introduce the following notations for analysis. Let

$$A_t(x_t) := (1 - \alpha_t) \nabla^2 \log q_t(x_t), \quad B_t(x_t) := I_d - (I_d + A_t(x_t))^{-1}, \quad (14)$$

which imply that

$$\Sigma_t(x_t) = \frac{1 - \alpha_t}{\alpha_t} (I_d + A_t(x_t)), \quad \Sigma_t^{-1}(x_t) = \frac{\alpha_t}{1 - \alpha_t} (I_d - B_t(x_t)).$$

Now, with the notation in Definition 2, for each  $i, j \in [d]$ ,  $A_t^{ij}(x_t) = \tilde{O}_{\mathcal{L}^r(Q_t)}(1 - \alpha_t)$  for all  $r \geq 1$  under Assumption 5. Also, when  $(1 - \alpha_t)$  is small, we can perform Taylor expansion on  $B_t(\cdot)$  around  $A_t(\cdot)$  and obtain, under Assumption 5,

$$B_t(X_t) = A_t(X_t) + \tilde{O}_{\mathcal{L}^r(Q_t)}((1 - \alpha_t)^2). \quad (15)$$

1134 *Remark 3.* In general, suppose that we choose  $P'_{t-1|t}$  whose conditional covariance satisfies

$$1135 \tilde{\Sigma}_t(X_t) = \frac{1 - \alpha_t}{\alpha_t} \left( I_d + A_t(X_t) + \tilde{O}_{\mathcal{L}^r(Q_t)} \left( (1 - \alpha_t)^2 \right) \right) = \Sigma_t(X_t) + \tilde{O}_{\mathcal{L}^r(Q_t)} \left( (1 - \alpha_t)^3 \right),$$

1136 where a small perturbation is added to the covariance matrix. An immediate consequence is that

$$1137 \tilde{\Sigma}_t^{-1}(X_t) = \frac{\alpha_t}{1 - \alpha_t} \left( I_d - B_t(X_t) + \tilde{O}_{\mathcal{L}^r(Q_t)} \left( (1 - \alpha_t)^2 \right) \right) = \Sigma_t^{-1}(X_t) + \tilde{O}_{\mathcal{L}^r(Q_t)} (1 - \alpha_t).$$

1138 Then, with such  $P'_{t-1|t}$  having a slightly perturbed covariance, the following Lemmas 5 and 7 still  
1139 hold with  $\tilde{A}_t(x_t)$  and  $\tilde{B}_t(x_t)$  such that

$$1140 \tilde{A}_t(x_t) := \frac{\alpha_t}{1 - \alpha_t} \tilde{\Sigma}_t(x_t) - I_d, \quad \tilde{B}_t(x_t) := I_d - (I_d + \tilde{A}_t(x_t))^{-1}.$$

1141 Note that  $\tilde{A}_t(X_t) = A_t(X_t) + \tilde{O}_{\mathcal{L}^r(Q_t)} \left( (1 - \alpha_t)^2 \right)$  and  $\tilde{B}_t(X_t) = B_t(X_t) + \tilde{O}_{\mathcal{L}^r(Q_t)} \left( (1 - \alpha_t)^2 \right)$ .

1142 In the following we write  $\mu_t = \mu_t(x_t)$ ,  $A_t = A_t(x_t)$ , and  $B_t = B_t(x_t)$  for brevity.

1143 **Lemma 5.** For any fixed  $x_t \in \mathbb{R}^d$ , as long as  $q_{t-1}$  is defined, we have

$$1144 q_{t-1|t}(x_{t-1}|x_t) = \frac{P'_{t-1|t}(x_{t-1}|x_t) e^{\zeta'_{t,t-1}(x_t, x_{t-1})}}{\mathbb{E}_{X_{t-1} \sim P'_{t-1|t}} [e^{\zeta'_{t,t-1}(x_t, X_{t-1})}]},$$

1145 where

$$1146 \zeta_{t,t-1}(x_t, x_{t-1}) := \log q_{t-1}(x_{t-1}) - \log q_{t-1}(\mu_t) - (x_{t-1} - \mu_t)^\top (\sqrt{\alpha_t} \nabla \log q_t(x_t)), \quad (16)$$

1147 and

$$1148 \begin{aligned} 1149 \zeta'_{t,t-1}(x_t, x_{t-1}) &:= \zeta_{t,t-1}(x_t, x_{t-1}) - \frac{\alpha_t}{2(1 - \alpha_t)} (x_{t-1} - \mu_t)^\top B_t (x_{t-1} - \mu_t) \\ 1150 &= \log q_{t-1}(x_{t-1}) - \log q_{t-1}(\mu_t) - (x_{t-1} - \mu_t)^\top (\sqrt{\alpha_t} \nabla \log q_t(x_t)) \\ 1151 &\quad - \frac{\alpha_t}{2(1 - \alpha_t)} (x_{t-1} - \mu_t)^\top B_t (x_{t-1} - \mu_t). \end{aligned} \quad (17)$$

1152 *Proof.* See Appendix F.4. □

1153 In the following we write  $\zeta_{t,t-1} = \zeta_{t,t-1}(x_t, x_{t-1})$  and  $\zeta'_{t,t-1} = \zeta'_{t,t-1}(x_t, x_{t-1})$  and omit dependencies on  $x_t$  and  $x_{t-1}$  for brevity. As we will see, (16) is the tilting factor for the regular diffusion process. Given the definition of  $\zeta'_{t,t-1}$  in (17), below we analyze  $\log q_{t-1}(x)$  around  $x = \mu_t$  using Taylor expansion. We first provide the following notations for the Taylor expansion.

1154 **Definition 3** (Taylor Expansion). Recall that  $x^i$  ( $1 \leq i \leq d$ ) denotes the  $i$ -th element of a vector  $x$ . Given an analytic function  $f(x)$ , its Taylor expansion around  $x = \mu$  is given by

$$1155 \begin{aligned} 1156 f(x) &= f(\mu) + \sum_{p=1}^{\infty} T_p(f, x, \mu) \\ 1157 &= f(\mu) + \nabla f(\mu)^\top (x - \mu) + \frac{1}{2} \sum_{i=1}^d \partial_{ii}^2 f(\mu) (x^i - \mu^i)^2 + \frac{1}{2} \sum_{\substack{i,j=1 \\ i \neq j}}^d \partial_{ij}^2 f(\mu) (x^i - \mu^i)(x^j - \mu^j) \\ 1158 &\quad + \sum_{p=3}^{\infty} T_p(f, x, \mu) \end{aligned}$$

1159 where, for  $p \geq 1$ , we define

$$1160 T_p(f, x, \mu) := \frac{1}{p!} \sum_{\gamma \in \mathbb{N}^d: \sum_i \gamma^i = p} \partial_{\mathbf{a}}^p f(\mu) \prod_{i=1}^d (x^i - \mu^i)^{\gamma^i} \quad (18)$$

1161 where in  $\mathbf{a} \in [d]^p$  the multiplicity of  $i \in [d]$  is  $\gamma^i$ .



If we specialize it to the case where  $f = \log q_{t-1}$ ,  $x = x_{t-1}$ , and  $\mu = \mu_t$ , we need the following lemma to guarantee the validity of Taylor expansion for  $t \geq 1$ .

**Lemma 6.** Fix  $t \geq 1$ . For any  $Q_0$  (not necessarily having a p.d.f. w.r.t. the Lebesgue measure), given any  $k \geq 1$  and any vector of indices  $\mathbf{a} \in [d]^k$ ,  $q_t$  exists and  $|\partial_{\mathbf{a}}^k \log q_t(x_t)| < \infty$ ,  $\forall x_t \in \mathbb{R}^d$  (which possibly depends on  $T$ ). Further,  $q_t$  and  $\log q_t$  are both analytic.

*Proof.* See Appendix F.5.  $\square$

Thus, by Assumption 2 and Lemma 6, since  $\log q_{t-1}$  is analytic, its Taylor expansion around  $x_{t-1} = \mu_t$  is equal to (cf. (16))

$$\zeta_{t,t-1} = (\nabla \log q_{t-1}(\mu_t) - \sqrt{\alpha_t} \nabla \log q_t(x_t))^\top (x_{t-1} - \mu_t) + \sum_{p=2}^{\infty} T_p(\log q_{t-1}, x_{t-1}, \mu_t), \quad (19)$$

and the Taylor expansion of  $\zeta'_{t,t-1}(x_t, x_{t-1})$  around  $x_{t-1} = \mu_t$  is (cf. (17))

$$\begin{aligned} \zeta'_{t,t-1} &= (\nabla \log q_{t-1}(\mu_t) - \sqrt{\alpha_t} \nabla \log q_t(x_t))^\top (x_{t-1} - \mu_t) \\ &\quad + \frac{1}{2} (x_{t-1} - \mu_t)^\top \left( \nabla^2 \log q_{t-1}(\mu_t) - \frac{\alpha_t}{1 - \alpha_t} B_t \right) (x_{t-1} - \mu_t) \\ &\quad + \sum_{p=3}^{\infty} T_p(\log q_{t-1}, x_{t-1}, \mu_t). \end{aligned} \quad (20)$$

In order to differentiate the second-order terms in (19) and (20), we reserve  $T_2$  for (19) and employ for (20):

$$T'_2(\log q_{t-1}, x_{t-1}, \mu_t) := \frac{1}{2} (x_{t-1} - \mu_t)^\top \left( \nabla^2 \log q_{t-1}(\mu_t) - \frac{\alpha_t}{1 - \alpha_t} B_t \right) (x_{t-1} - \mu_t).$$

Compared with the tilting factor for the regular process in  $\zeta_{t,t-1}$ , an additional term that is related to  $\Sigma_t$  (and thus  $B_t$ ) is introduced in  $\zeta'_{t,t-1}$ . From the perspective of Taylor expansion, we can further control the *second*-order term in the Taylor expansion of  $\log q_{t-1}$  around  $\mu_t$  through this extra term, which improves the accuracy of posterior approximation at each step.

To use Taylor expansion to upper-bound the reverse-step error in (13), we first note that, for any fixed  $x_t$ ,

$$\begin{aligned} &\mathbb{E}_{X_{t-1} \sim Q_{t-1|t}} \left[ \log \frac{q_{t-1|t}(X_{t-1}|x_t)}{p'_{t-1|t}(X_{t-1}|x_t)} \right] \\ &= \mathbb{E}_{X_{t-1} \sim Q_{t-1|t}} \left[ \zeta'_{t,t-1} - \log \mathbb{E}_{X_{t-1} \sim P'_{t-1|t}} [e^{\zeta'_{t,t-1}}] \right] \\ &= \mathbb{E}_{X_{t-1} \sim Q_{t-1|t}} [\zeta'_{t,t-1}] - \log \mathbb{E}_{X_{t-1} \sim P'_{t-1|t}} [e^{\zeta'_{t,t-1}}] \\ &\stackrel{(i)}{\leq} \mathbb{E}_{X_{t-1} \sim Q_{t-1|t}} [\zeta'_{t,t-1}] + \mathbb{E}_{X_{t-1} \sim P'_{t-1|t}} [-\log e^{\zeta'_{t,t-1}}] \\ &= \mathbb{E}_{X_{t-1} \sim Q_{t-1|t}} [\zeta'_{t,t-1}] - \mathbb{E}_{X_{t-1} \sim P'_{t-1|t}} [\zeta'_{t,t-1}] \end{aligned} \quad (21)$$

where in (i) we use Jensen's inequality and note that  $-\log(\cdot)$  is convex. In the remaining steps, we analyze the expected values of the tilting factor separately.

#### D.4 STEP 3: CONDITIONAL EXPECTATION OF $\zeta'_{t,t-1}$ UNDER $P'_{t-1|t}$

With Taylor expansion around the posterior mean, the calculation of the expected values is reduced to that of all the (centralized) moments. To start, it is useful to examine the rate of  $\frac{1 - \alpha_t}{\alpha_t}$ . A direct implication of Definition 1 is that, with some constant  $C_1$ , since  $\alpha_t \searrow 0$  as  $T \rightarrow \infty$ ,

$$\frac{(1 - \alpha_t)^p}{\alpha_t^q} \leq \frac{C_1^p \log^p T / T^p}{(1 - C_1 \log T / T)^q} \lesssim (1 - \alpha_t)^p, \quad \forall p, q \geq 1, t \geq 1. \quad (22)$$

Below, we first calculate the centralized moments under  $P'_{t-1|t}$ . We employ Isserlis's Theorem for our help, which constitutes the main idea in the lemma below. Note that the results in this subsection hold as long as  $Q_0$  has a p.d.f..

**Lemma 7.** Fix  $t \geq 1$ . For brevity write  $Z_i = X_{t-1}^i - \mu_t^i$ ,  $\forall i \in [d]$ ,  $A = A_t(x_t)$ , and  $\mathbb{E}[\cdot]$  as a shorthand for  $\mathbb{E}_{X_{t-1} \sim P'_{t-1|t}}[\cdot]$ . Note that we have  $A_t^{ij}(x_t) = \tilde{O}_{\mathcal{L}^p(Q_t)}(1 - \alpha_t)$  for all  $i, j \in [d]$  under Assumption 5. Thus, the following results hold:  $\forall p \geq 1$ ,

$$\begin{aligned} \mathbb{E} \left[ \prod_{i \in \mathbf{a}} Z_i \right] &= 0, \quad \forall \mathbf{a} : |\mathbf{a}| \text{ odd}, \\ \mathbb{E} \left[ \prod_{i \in \mathbf{a}} Z_i \right] &= \tilde{O}_{\mathcal{L}^p(Q_t)} \left( (1 - \alpha_t)^{\frac{|\mathbf{a}|}{2}} \right), \quad \forall \mathbf{a} : |\mathbf{a}| \text{ even}. \end{aligned}$$

Specifically, for  $i, j, k, l \in [d]$  all differ, the fourth moment is

$$\begin{aligned} \mathbb{E}[Z_i^4] &= 3 \left( \frac{1 - \alpha_t}{\alpha_t} \right)^2 (1 + A^{ii})^2 \\ \mathbb{E}[Z_i^3 Z_j] &= 3 \left( \frac{1 - \alpha_t}{\alpha_t} \right)^2 A^{ij} (1 + A^{ii}) \\ \mathbb{E}[Z_i^2 Z_j^2] &= \left( \frac{1 - \alpha_t}{\alpha_t} \right)^2 (1 + A^{ii})(1 + A^{jj}) + \tilde{O}_{\mathcal{L}^p(Q_t)}((1 - \alpha_t)^4) \\ \mathbb{E}[Z_i^2 Z_j Z_k] &= \left( \frac{1 - \alpha_t}{\alpha_t} \right)^2 (1 + A^{ii}) A^{jk} + \tilde{O}_{\mathcal{L}^p(Q_t)}((1 - \alpha_t)^4) \\ \mathbb{E}[Z_i Z_j Z_k Z_l] &= \tilde{O}_{\mathcal{L}^p(Q_t)}((1 - \alpha_t)^4). \end{aligned}$$

For  $i, j, k \in [d]$  all differ, the sixth moment is

$$\begin{aligned} \mathbb{E}[Z_i^6] &= 15 \left( \frac{1 - \alpha_t}{\alpha_t} \right)^3 (1 + A^{ii})^3 \\ \mathbb{E}[Z_i^4 Z_j^2] &= 3 \left( \frac{1 - \alpha_t}{\alpha_t} \right)^3 (1 + A^{ii})^2 (1 + A^{jj}) + \tilde{O}_{\mathcal{L}^p(Q_t)}((1 - \alpha_t)^4) \\ \mathbb{E}[Z_i^2 Z_j^2 Z_k^2] &= \left( \frac{1 - \alpha_t}{\alpha_t} \right)^3 (1 + A^{ii})(1 + A^{jj})(1 + A^{kk}) + \tilde{O}_{\mathcal{L}^p(Q_t)}((1 - \alpha_t)^4), \end{aligned}$$

and  $\mathbb{E} \left[ \prod_{i \in \mathbf{a}: |\mathbf{a}|=6} Z_i \right] = \tilde{O}_{\mathcal{L}^p(Q_t)}((1 - \alpha_t)^4)$  otherwise. All the rates are under Assumption 5.

*Proof.* See Appendix F.6. □

#### D.5 STEP 4: CONDITIONAL EXPECTATION OF $\zeta'_{t,t-1}$ UNDER $Q_{t-1|t}$

Although each  $Q_{t|t-1}$  is conditionally Gaussian, the posterior  $Q_{t-1|t}$  is not Gaussian in general. In the following, we analyze the posterior centralized moments under  $Q_{t-1|t}$  using the idea of Tweedie's formula Efron (2011). Then, we apply them to analyze  $\mathbb{E}_{X_{t-1} \sim Q_{t-1|t}}[\zeta_{t,t-1}]$ , again using the Taylor expansion in (19). Again, the result is more generally applicable to non-smooth  $Q_0$  at  $t \geq 2$  due to Lemma 6.

**Lemma 8.** Fix  $t \geq 1$  such that  $q_{t-1}$  exists. Define  $\tilde{x}_t := \frac{\sqrt{\alpha_t}}{1 - \alpha_t} x_t$ , and

$$\kappa(\tilde{x}_t) := \log q_t \left( \frac{1 - \alpha_t}{\sqrt{\alpha_t}} \tilde{x}_t \right) + \frac{1 - \alpha_t}{2\alpha_t} \|\tilde{x}_t\|^2 + \frac{d}{2} \log(2\pi(1 - \alpha_t)). \quad (23)$$

Let  $1 \leq i, j, k, l \leq d$ , which are possibly equal to each other. The first 3 centralized moments under  $Q_{t-1|t}$  satisfy

$$\begin{aligned} \mathbb{E}_{X_{t-1} \sim Q_{t-1|t}}[X_{t-1}] &= \nabla \kappa = \mu_t \\ \mathbb{E}_{X_{t-1} \sim Q_{t-1|t}}[(X_{t-1} - \mu_t)(X_{t-1} - \mu_t)^\top] &= \nabla^2 \kappa = \frac{1 - \alpha_t}{\alpha_t} I_d + \frac{(1 - \alpha_t)^2}{\alpha_t} \nabla^2 \log q_t(x_t) \\ \mathbb{E}_{X_{t-1}, X_t \sim Q_{t-1,t}} \left[ (X_{t-1}^i - \mu_t^i)(X_{t-1}^j - \mu_t^j)(X_{t-1}^k - \mu_t^k) \right] &= 0 \end{aligned}$$

$$= \mathbb{E}_{X_t \sim Q_t} [\partial_{ijk}^3 \kappa] = \frac{(1 - \alpha_t)^3}{\alpha_t^{3/2}} \mathbb{E}_{X_t \sim Q_t} [\partial_{ijk}^3 \log q_t(X_t)] = \tilde{O}((1 - \alpha_t)^3).$$

The fourth centralized moment satisfies

$$\begin{aligned} & \mathbb{E}_{X_{t-1}, X_t \sim Q_{t-1,t}} \left[ (X_{t-1}^i - \mu_t^i)(X_{t-1}^j - \mu_t^j)(X_{t-1}^k - \mu_t^k)(X_{t-1}^l - \mu_t^l) \right] \\ &= \mathbb{E}_{X_t \sim Q_t} [(\partial_{ij}^2 \kappa)(\partial_{kl}^2 \kappa) + (\partial_{ik}^2 \kappa)(\partial_{jl}^2 \kappa) + (\partial_{il}^2 \kappa)(\partial_{jk}^2 \kappa) + \partial_{ijkl}^4 \kappa] \\ &= \begin{cases} 3 \left( \frac{1 - \alpha_t}{\alpha_t} \right)^2 + \tilde{O}((1 - \alpha_t)^3), & \text{if } i = j = k = l, \\ \left( \frac{1 - \alpha_t}{\alpha_t} \right)^2 + \tilde{O}((1 - \alpha_t)^3), & \text{if } i = k \neq j = l, \\ \tilde{O}((1 - \alpha_t)^3), & \text{otherwise.} \end{cases} \end{aligned}$$

Note that all derivatives above are w.r.t.  $\tilde{x}_t$ . All the rates are under Assumption 5.

*Proof.* See Appendix F.7.  $\square$

Lemma 8 also justifies the expression of  $\mu_t$  and  $\Sigma_t$  in the diffusion process (i.e., (3) and (4)), which match the posterior mean and variance, respectively.

Next we turn to calculate the fifth and sixth centralized moment under  $Q_{t-1|t}$ , again drawing the idea of Tweedie's formula (Efron, 2011). This is a direct extension to Lemma 8.

**Lemma 9.** Fix  $t \geq 1$  such that  $q_{t-1}$  exists. Fix  $x_t \in \mathbb{R}^d$ . Under Assumption 5, with the same definitions of  $\tilde{x}_t$  and  $\kappa(\tilde{x}_t)$  as in Lemma 8, the fifth centralized moment is

$$\begin{aligned} & \mathbb{E}_{X_{t-1} \sim Q_{t-1|t}} \left[ (X_{t-1}^i - \mu_t^i)(X_{t-1}^j - \mu_t^j)(X_{t-1}^k - \mu_t^k)(X_{t-1}^l - \mu_t^l)(X_{t-1}^m - \mu_t^m) \right] \\ &= \sum_{\xi \in \binom{\{i,j,k,l,m\}}{2}} (\partial_{\xi}^2 \kappa)(\partial_{\{i,j,k,l,m\} \setminus \xi}^3 \kappa) + \partial_{ijklm}^5 \kappa = \tilde{O}_{\mathcal{L}^p(Q_t)}((1 - \alpha_t)^4) \end{aligned}$$

where, given a set  $A$ , we define

$$\binom{A}{2} := \left\{ \{a_1, a_2\} : a_1, a_2 \in A, a_1 \neq a_2 \right\}.$$

Let  $P_n^k$  be the set that contains all distinct size- $k$  partitions of  $[n]$ . Define

$$\text{part}_2(A) := \left\{ \{(a_i, a_j) : \{i, j\} \in p\} : p \in P_{|A|}^2 \right\}.$$

The sixth centralized moment is

$$\begin{aligned} & \mathbb{E}_{X_{t-1} \sim Q_{t-1|t}} \left[ (X_{t-1}^i - \mu_t^i)(X_{t-1}^j - \mu_t^j)(X_{t-1}^k - \mu_t^k)(X_{t-1}^l - \mu_t^l)(X_{t-1}^m - \mu_t^m)(X_{t-1}^n - \mu_t^n) \right] \\ &= \sum_{(\xi_1, \xi_2, \xi_3) \in \text{part}_2(\{i,j,k,l,m,n\})} (\partial_{\xi_1}^2 \kappa)(\partial_{\xi_2}^2 \kappa)(\partial_{\xi_3}^2 \kappa) + \tilde{O}_{\mathcal{L}^p(Q_t)}((1 - \alpha_t)^4) \\ &= \begin{cases} 15 \left( \frac{1 - \alpha_t}{\alpha_t} \right)^3 + \tilde{O}_{\mathcal{L}^p(Q_t)}((1 - \alpha_t)^4), & \text{if } i = j = k = l = m = n \\ 3 \left( \frac{1 - \alpha_t}{\alpha_t} \right)^3 + \tilde{O}_{\mathcal{L}^p(Q_t)}((1 - \alpha_t)^4), & \text{if } i = k = m = n \neq j = l \\ \left( \frac{1 - \alpha_t}{\alpha_t} \right)^3 + \tilde{O}_{\mathcal{L}^p(Q_t)}((1 - \alpha_t)^4), & \text{if } i = l, j = m, k = n \text{ while } i, j, k \text{ all differ} \\ \tilde{O}_{\mathcal{L}^p(Q_t)}((1 - \alpha_t)^4), & \text{otherwise} \end{cases} \end{aligned}$$

Again note that all derivatives above are w.r.t.  $\tilde{x}_t$ .

*Proof.* See Appendix F.8.  $\square$

The following lemma provides the correct order (in terms of  $(1 - \alpha_t)$ ) for all higher-order posterior centralized moments. In other words, this shows that  $Q_{t-1|t}$  has nice Gaussian-like concentration.

**Lemma 10.** Fix  $t \geq 1$  and  $p \geq 2$ . Let  $\mathbf{a} = (a_1, \dots, a_p) \in [d]^p$  be a vector of indices of length  $p$ . Under the same conditions as in Lemma 8, if  $p$  is odd,

$$\mathbb{E}_{X_{t-1}, X_t \sim Q_{t-1,t}} \left[ \prod_{i=1}^p (X_{t-1}^{a_i} - \mu_t^{a_i}) \right] = \tilde{O} \left( (1 - \alpha_t)^{\frac{p+3}{2}} \right), \forall \mathbf{a} \in [d]^p. \quad (24)$$

If  $p$  is even,

$$\mathbb{E}_{X_{t-1}, X_t \sim Q_{t-1,t}} \left[ \prod_{i=1}^p (X_{t-1}^{a_i} - \mu_t^{a_i}) \right] = \tilde{O} \left( (1 - \alpha_t)^{\frac{p}{2}} \right), \forall \mathbf{a} \in [d]^p. \quad (25)$$

*Proof.* See Appendix F.9.  $\square$

## D.6 STEP 5: BOUNDING TERM 3 – REVERSE-STEP ERROR

We are now ready to assemble the respective moments into the final convergence rate. In the following lemma, we use the results in the previous lemmas to control the difference  $\mathbb{E}_{X_{t-1} \sim Q_{t-1|t}} [\zeta'_{t,t-1}] - \mathbb{E}_{X_{t-1} \sim P'_{t-1|t}} [\zeta'_{t,t-1}]$  in (21).

**Lemma 11.** Suppose that Assumption 5 holds and that  $q_{t-1}$  exists. Then,

$$\begin{aligned} & \mathbb{E}_{X_t \sim Q_t} \left( \mathbb{E}_{X_{t-1} \sim Q_{t-1|t}} - \mathbb{E}_{X_{t-1} \sim P'_{t-1|t}} \right) [\zeta'_{t,t-1}] \\ &= \frac{(1 - \alpha_t)^3}{3! \alpha_t^{3/2}} \sum_{i,j,k=1}^d \mathbb{E}_{X_t \sim Q_t} [\partial_{ijk}^3 \log q_{t-1}(\mu_t(X_t)) \partial_{ijk}^3 \log q_t(X_t)] + \tilde{O}((1 - \alpha_t)^4). \end{aligned}$$

*Proof.* See Appendix F.10.  $\square$

Therefore, under Assumptions 2 and 5 we combine Lemma 11 and (21) and get

$$\begin{aligned} & \sum_{t=1}^T \mathbb{E}_{X_{t-1}, X_t \sim Q_{t-1|t}} \left[ \log \frac{q_{t-1|t}(X_{t-1}|X_t)}{p'_{t-1|t}(X_{t-1}|X_t)} \right] \\ & \lesssim (1 - \alpha_t)^3 \sum_{i,j,k=1}^d \mathbb{E}_{X_t \sim Q_t} [\partial_{ijk}^3 \log q_{t-1}(\mu_t(X_t)) \partial_{ijk}^3 \log q_t(X_t)]. \quad (26) \end{aligned}$$

This completes the proof of Theorem 1.

Before we end this section, we provide an upper bound of the reverse-step error when the conditional covariance of  $P'_{t-1|t}$  is slightly perturbed (see Remark 3).

**Corollary 3.** Suppose that Assumption 5 holds and that  $q_{t-1}$  exists. Suppose that the conditional covariance of  $P'_{t-1|t}$  is slightly perturbed, which satisfies

$$\tilde{\Sigma}_t(x_t) = \frac{1 - \alpha_t}{\alpha_t} (I_d + A_t(x_t) + \Xi_t(x_t)),$$

where  $\Xi_t(X_t) = \tilde{O}_{\mathcal{L}^r(Q_t)}((1 - \alpha_t)^2)$  for all  $r \geq 1$ . Then,

$$\begin{aligned} & \sum_{t=1}^T \mathbb{E}_{X_{t-1}, X_t \sim Q_{t-1|t}} \left[ \log \frac{q_{t-1|t}(X_{t-1}|X_t)}{p'_{t-1|t}(X_{t-1}|X_t)} \right] \\ & \lesssim -(1 - \alpha_t) \mathbb{E}_{X_t \sim Q_t} \text{Tr} \left( (\nabla^2 \log q_{t-1}(\mu_t(X_t)) - \alpha_t \nabla^2 \log q_t(X_t)) \Xi_t(X_t) \right) \\ & \quad + (1 - \alpha_t)^3 \sum_{i,j,k=1}^d \mathbb{E}_{X_t \sim Q_t} [\partial_{ijk}^3 \log q_{t-1}(\mu_t(X_t)) \partial_{ijk}^3 \log q_t(X_t)] \\ & = \tilde{O} \left( \frac{1}{T^2} \right). \end{aligned}$$

*Proof.* See Appendix F.11.  $\square$

## 1404 E PROOF OF COROLLARY 1

1405 Note that  $q_1$  always exists and is analytic by Lemma 6. Therefore, it remains to upper-bound the  
1406 mismatch between  $Q_0$  and  $Q_1$ . In the following lemma we provide such a common bound in  
1407 Wasserstein distance, which is provided only for completeness.

1408 **Lemma 12.** *For any  $Q_0$ ,*

$$1409 \quad W_2(Q_0, Q_1)^2 \leq (1 - \alpha_1)(M_2 + 1)d.$$

1410 *Remark 4.* If  $1 - \alpha_1 = \delta$ , this implies that

$$1411 \quad W_2(Q_0, Q_1)^2 \lesssim \delta d.$$

1412 *Proof.* See Appendix F.12. □

1413 The proof of this corollary is thus complete. A consequence of Lemma 12 is that, in order to obtain  
1414 convergence guarantees for general distributions, one can view  $1 - \alpha_1$  as controlling the mismatch  
1415 between  $Q_0$  and  $Q_1$  (in terms of the Wasserstein distance), and  $1 - \alpha_t, \forall t \geq 2$  as controlling the  
1416 mismatch between  $Q_1$  and  $\hat{P}'_1$  (in terms of the KL-divergence).

## 1420 F AUXILIARY PROOFS FOR THEOREM 1 AND COROLLARY 1

1421 In this section, we provide the proofs for those auxiliary lemmas in the proof of Theorem 1 and Corol-  
1422 lary 1.

### 1423 F.1 PROOF OF LEMMA 3

1424 First, note that

$$1425 \quad q_T(x_T) = \mathbb{E}_{X_0 \sim Q_0} [q_{T|0}(x_T|X_0)].$$

1426 Also note that the function  $f(x) = x \log(x)$  is convex. Thus, by Jensen's inequality,

$$\begin{aligned} 1427 \quad \mathbb{E}_{X_T \sim Q_T} [\log q_T(X_T)] &= \int \mathbb{E}_{X_0 \sim Q_0} [q_{T|0}(x_T|X_0)] \log \mathbb{E}_{X_0 \sim Q_0} [q_{T|0}(x_T|X_0)] dx_T \\ 1428 \quad &\leq \int \mathbb{E}_{X_0 \sim Q_0} [q_{T|0}(x_T|X_0) \log q_{T|0}(x_T|X_0)] dx_T \\ 1429 \quad &= \mathbb{E}_{X_0 \sim Q_0} \left[ \int q_{T|0}(x_T|X_0) \log q_{T|0}(x_T|X_0) dx_T \right]. \end{aligned}$$

1430 Since  $Q_{T|0}$  is conditional Gaussian  $\mathcal{N}(\sqrt{\bar{\alpha}_T}x_0, (1 - \bar{\alpha}_T)I_d)$ , its negative conditional entropy equals

$$1431 \quad \int q_{T|0}(x_T|x_0) \log q_{T|0}(x_T|x_0) dx_T = -\frac{d}{2} - \frac{d}{2} \log(2\pi(1 - \bar{\alpha}_T))$$

1432 for any  $x_0 \in \mathbb{R}^d$ . On the other hand, since  $P'_T = \mathcal{N}(0, I_d)$ ,

$$1433 \quad \mathbb{E}_{X_T \sim Q_T} [\log p'_T(X_T)] = -\frac{d}{2} \log(2\pi) - \frac{1}{2} \mathbb{E}_{X_T \sim Q_T} \|X_T\|^2$$

1434 where

$$\begin{aligned} 1435 \quad \mathbb{E}_{X_T \sim Q_T} \|X_T\|^2 &= \bar{\alpha}_T \mathbb{E}_{X_0 \sim Q_0} \|X_0\|^2 + (1 - \bar{\alpha}_T) \mathbb{E}_{\bar{W}_T \sim \mathcal{N}(0, I_d)} \|\bar{W}_T\|^2 \\ 1436 \quad &= \bar{\alpha}_T \mathbb{E}_{X_0 \sim Q_0} \|X_0\|^2 + (1 - \bar{\alpha}_T)d. \end{aligned}$$

1437 Putting the two together,

$$\begin{aligned} 1438 \quad \mathbb{E}_{X_T \sim Q_T} \left[ \log \frac{q_T(X_T)}{p'_T(X_T)} \right] &= \mathbb{E}_{X_T \sim Q_T} [\log q_T(X_T)] - \mathbb{E}_{X_T \sim Q_T} [\log p'_T(X_T)] \\ 1439 \quad &\leq -\frac{d}{2} - \frac{d}{2} \log(2\pi(1 - \bar{\alpha}_T)) + \frac{d}{2} \log(2\pi) + \frac{1}{2} \left( \bar{\alpha}_T \mathbb{E}_{X_0 \sim Q_0} \|X_0\|^2 + (1 - \bar{\alpha}_T)d \right) \\ 1440 \quad &= \frac{1}{2} \bar{\alpha}_T \mathbb{E}_{X_0 \sim Q_0} \|X_0\|^2 - \frac{d\bar{\alpha}_T}{2} - \frac{d}{2} \log(1 - \bar{\alpha}_T). \end{aligned}$$

1441 When  $T$  is large (and thus when  $\bar{\alpha}_T$  is small), the Taylor expansion w.r.t.  $\bar{\alpha}_T$  around 0 yields

$$1442 \quad \log(1 - \bar{\alpha}_T) = -\bar{\alpha}_T + O(\bar{\alpha}_T^2).$$

Therefore,

$$\begin{aligned} \mathbb{E}_{X_T \sim Q_T} \left[ \log \frac{q_T(X_T)}{p'_T(X_T)} \right] &\leq \frac{1}{2} \bar{\alpha}_T \mathbb{E}_{X_0 \sim Q_0} \|X_0\|^2 - \frac{d\bar{\alpha}_T}{2} - \frac{d}{2}(-\bar{\alpha}_T) + O(\bar{\alpha}_T^2) \\ &\leq \frac{1}{2} \bar{\alpha}_T M_2 d + O(\bar{\alpha}_T^2). \end{aligned}$$

## F.2 PROOF OF LEMMA 4

To start, note that both  $P'_{t-1|t}$  and  $\widehat{P}'_{t-1|t}$  are Gaussian (yet having different mean *and* variance). Thus, for each  $t = 1, \dots, T$ ,

$$\begin{aligned} &\log \frac{p'_{t-1|t}(x_{t-1}|x_t)}{\widehat{p}'_{t-1|t}(x_{t-1}|x_t)} \\ &= \log \left( \det(\Sigma_t)^{-\frac{1}{2}} \right) - \log \left( \det(\widehat{\Sigma}_t)^{-\frac{1}{2}} \right) \\ &\quad - \frac{1}{2} (x_{t-1} - \mu_t)^\top \Sigma_t^{-1} (x_{t-1} - \mu_t) + \frac{1}{2} (x_{t-1} - \widehat{\mu}_t)^\top \widehat{\Sigma}_t^{-1} (x_{t-1} - \widehat{\mu}_t) \\ &= \frac{1}{2} \left( \log(\det(\widehat{\Sigma}_t)) - \log(\det(\Sigma_t)) \right) + \frac{1}{2} (x_{t-1} - \mu_t)^\top (\widehat{\Sigma}_t^{-1} - \Sigma_t^{-1}) (x_{t-1} - \mu_t) \\ &\quad + \frac{1}{2} (x_{t-1} - \widehat{\mu}_t)^\top \widehat{\Sigma}_t^{-1} (x_{t-1} - \widehat{\mu}_t) - \frac{1}{2} (x_{t-1} - \mu_t)^\top \widehat{\Sigma}_t^{-1} (x_{t-1} - \mu_t) \\ &= \frac{1}{2} \left( \log(\det(\widehat{\Sigma}_t)) - \log(\det(\Sigma_t)) \right) + \frac{1}{2} (x_{t-1} - \mu_t)^\top (\widehat{\Sigma}_t^{-1} - \Sigma_t^{-1}) (x_{t-1} - \mu_t) \\ &\quad + \frac{1}{2} (\mu_t - \widehat{\mu}_t)^\top \widehat{\Sigma}_t^{-1} (x_{t-1} - \mu_t) + \frac{1}{2} (x_{t-1} - \mu_t)^\top \widehat{\Sigma}_t^{-1} (\mu_t - \widehat{\mu}_t) + \frac{1}{2} (\mu_t - \widehat{\mu}_t)^\top \widehat{\Sigma}_t^{-1} (\mu_t - \widehat{\mu}_t). \end{aligned} \tag{27}$$

There are five terms in (27). We first consider the third and the fourth term, for which we have

$$\begin{aligned} \mathbb{E}_{X_{t-1} \sim Q_{t-1|t}} \left[ (\mu_t - \widehat{\mu}_t)^\top \widehat{\Sigma}_t^{-1} (X_{t-1} - \mu_t) \right] &= (\mu_t - \widehat{\mu}_t)^\top \widehat{\Sigma}_t^{-1} \mathbb{E}_{X_{t-1} \sim Q_{t-1|t}} [X_{t-1} - \mu_t] = 0, \\ \mathbb{E}_{X_{t-1} \sim Q_{t-1|t}} \left[ (X_{t-1} - \mu_t)^\top \widehat{\Sigma}_t^{-1} (\mu_t - \widehat{\mu}_t) \right] &= \mathbb{E}_{X_{t-1} \sim Q_{t-1|t}} [X_{t-1} - \mu_t]^\top \widehat{\Sigma}_t^{-1} (\mu_t - \widehat{\mu}_t) = 0. \end{aligned}$$

Now consider the expectation of the last term in (27). From the definition of  $\widehat{\Sigma}_t$  in (6), for small  $1 - \alpha_t$  we have  $\widehat{\Sigma}_t \succ 0$ , and we can define  $\widehat{B}_t := I_d - (I_d + (1 - \alpha_t)H_t)^{-1}$ , and thus  $\widehat{\Sigma}_t^{-1} = \frac{\alpha_t}{1 - \alpha_t} (I_d - \widehat{B}_t)$ .

From Taylor expansion, we have  $\widehat{B}_t = (1 - \alpha_t)H_t + \tilde{O}_{\mathcal{L}^p(Q_t)}((1 - \alpha_t)^2)$ . Thus, for each  $t \geq 1$ ,

$$\begin{aligned} &\mathbb{E}_{X_t \sim Q_t} \left[ (\mu_t(X_t) - \widehat{\mu}_t(X_t))^\top \widehat{\Sigma}_t^{-1}(X_t) (\mu_t(X_t) - \widehat{\mu}_t(X_t)) \right] \\ &= (1 - \alpha_t) \mathbb{E}_{X_t \sim Q_t} \left[ (s_t(X_t) - \nabla \log q_t(X_t))^\top (I_d - \widehat{B}_t(X_t)) (s_t(X_t) - \nabla \log q_t(X_t)) \right] \\ &= (1 - \alpha_t) \mathbb{E}_{X_t \sim Q_t} \left[ (s_t(X_t) - \nabla \log q_t(X_t))^\top (I_d + (1 - \alpha_t)H_t(X_t))^{-1} (s_t(X_t) - \nabla \log q_t(X_t)) \right] \\ &\lesssim (1 - \alpha_t) \mathbb{E}_{X_t \sim Q_t} \|s_t(X_t) - \nabla \log q_t(X_t)\|^2 \end{aligned}$$

where the last line follows from the regularity condition on  $H_t$  in Assumption 3. Therefore, the expectation of the last term in (27) can be bounded as

$$\begin{aligned} &\sum_{t=1}^T \mathbb{E}_{X_t \sim Q_t} \left[ (\mu_t(X_t) - \widehat{\mu}_t(X_t))^\top \widehat{\Sigma}_t^{-1}(X_t) (\mu_t(X_t) - \widehat{\mu}_t(X_t)) \right] \\ &\lesssim \sum_{t=1}^T (1 - \alpha_t) \mathbb{E}_{X_t \sim Q_t} \|s_t(X_t) - \nabla \log q_t(X_t)\|^2 \\ &\lesssim (\log T) \varepsilon^2, \end{aligned} \tag{28}$$

where the last line follows by the score estimation error in Assumption 3.

Next we turn to the first two terms in (27). First, note that for all  $i, j \in [d]$ , we have  $(1 - \alpha_t)H_t^{ij}(X_t) = \tilde{O}_{\mathcal{L}^p(Q_t)}(1 - \alpha_t)$  under Assumption 3. Now, the first term of (27) is given by

$$\log(\det(\widehat{\Sigma}_t)) - \log(\det(\Sigma_t)) = \log(\det(I_d + (1 - \alpha_t)H_t)) - \log(\det(I_d + (1 - \alpha_t)\nabla^2 \log q_t(x_t))).$$

When  $(1 - \alpha_t)$  is small, we can use Taylor expansion for the functions  $\det(\cdot)$  and  $\log(\cdot)$  to get

$$\begin{aligned} & \log(\det(I_d + (1 - \alpha_t)H_t)) \\ &= \log\left(1 + (1 - \alpha_t)\text{Tr}(H_t) + \frac{(1 - \alpha_t)^2}{2}(\text{Tr}(H_t)^2 - \text{Tr}(H_t^2)) + \tilde{O}_{\mathcal{L}^p(Q_t)}((1 - \alpha_t)^3)\right) \\ &= (1 - \alpha_t)\text{Tr}(H_t) + \frac{(1 - \alpha_t)^2}{2}(\text{Tr}(H_t)^2 - \text{Tr}(H_t^2)) - \frac{(1 - \alpha_t)^2}{2}\text{Tr}(H_t)^2 + \tilde{O}_{\mathcal{L}^p(Q_t)}((1 - \alpha_t)^3) \\ &= (1 - \alpha_t)\text{Tr}(H_t) - \frac{(1 - \alpha_t)^2}{2}\text{Tr}(H_t^2) + \tilde{O}_{\mathcal{L}^p(Q_t)}((1 - \alpha_t)^3). \end{aligned}$$

Similar expression can be obtained for  $\log(\det(I_d + (1 - \alpha_t)\nabla^2 \log q_t(x_t)))$ . Thus, the first term in (27) is equal to

$$\begin{aligned} & \log(\det(\widehat{\Sigma}_t)) - \log(\det(\Sigma_t)) \\ &= (1 - \alpha_t)(\text{Tr}(H_t) - \text{Tr}(\nabla^2 \log q_t(x_t))) - \frac{(1 - \alpha_t)^2}{2}[\text{Tr}(H_t^2) - \text{Tr}((\nabla^2 \log q_t(x_t))^2)] \\ & \quad + \tilde{O}_{\mathcal{L}^p(Q_t)}((1 - \alpha_t)^3). \end{aligned}$$

For the second term in (27), we first take expectation over  $x_{t-1}$  and get

$$\mathbb{E}_{X_{t-1} \sim Q_{t-1}|t} \left[ (X_{t-1} - \mu_t)^\top (\widehat{\Sigma}_t^{-1} - \Sigma_t^{-1})(X_{t-1} - \mu_t) \right] = \text{Tr} \left( (\widehat{\Sigma}_t^{-1} - \Sigma_t^{-1})\Sigma_t \right).$$

To proceed, note that

$$(I_d + (1 - \alpha_t)H_t)^{-1} \stackrel{(iii)}{=} I_d - (1 - \alpha_t)H_t + (1 - \alpha_t)^2 H_t^2 + \tilde{O}_{\mathcal{L}^p(Q_t)}((1 - \alpha_t)^3). \quad (29)$$

To see (iii), we write  $S_t$  as the true inverse of  $I_d + (1 - \alpha_t)H_t$ . Its existence is guaranteed if  $(1 - \alpha_t)$  is small. Since

$$(I_d + (1 - \alpha_t)H_t)(I_d - (1 - \alpha_t)H_t + (1 - \alpha_t)^2 H_t^2) = I_d + \tilde{O}_{\mathcal{L}^p(Q_t)}((1 - \alpha_t)^3),$$

we have

$$(I_d + (1 - \alpha_t)H_t)(I_d - (1 - \alpha_t)H_t + (1 - \alpha_t)^2 H_t^2 - S_t) = \tilde{O}_{\mathcal{L}^p(Q_t)}((1 - \alpha_t)^3)$$

which implies that  $S_t = I_d - (1 - \alpha_t)H_t + (1 - \alpha_t)^2 H_t^2 + \tilde{O}_{\mathcal{L}^p(Q_t)}((1 - \alpha_t)^3)$ . This shows the validity of (iii). Therefore,

$$\begin{aligned} & \text{Tr} \left( (\widehat{\Sigma}_t^{-1} - \Sigma_t^{-1})\Sigma_t \right) = \text{Tr}(\widehat{\Sigma}_t^{-1}\Sigma_t - I_d) \\ &= \text{Tr} \left( \left[ I_d - (1 - \alpha_t)H_t + (1 - \alpha_t)^2 H_t^2 + \tilde{O}_{\mathcal{L}^p(Q_t)}((1 - \alpha_t)^3) \right] \right. \\ & \quad \left. [I_d + (1 - \alpha_t)\nabla^2 \log q_t(x_t)] - I_d \right) \\ &= (1 - \alpha_t) [\text{Tr}(\nabla^2 \log q_t(x_t)) - \text{Tr}(H_t)] \\ & \quad + (1 - \alpha_t)^2 [\text{Tr}(H_t^2) - \text{Tr}(H_t \nabla^2 \log q_t(x_t))] + \tilde{O}_{\mathcal{L}^p(Q_t)}((1 - \alpha_t)^3). \end{aligned}$$

Adding this to the first term of (27) and taking expectation over  $X_t \sim Q_t$  (noting Assumption 5 here), we get

$$\begin{aligned} & \mathbb{E}_{X_{t-1}, X_t \sim Q_{t-1}, t} \left[ \left( \log(\det(\widehat{\Sigma}_t(X_t))) - \log(\det(\Sigma_t(X_t))) \right) \right. \\ & \quad \left. + (X_{t-1} - \mu_t(X_t))^\top (\widehat{\Sigma}_t^{-1}(X_t) - \Sigma_t^{-1}(X_t))(X_{t-1} - \mu_t(X_t)) \right] \\ &= \frac{(1 - \alpha_t)^2}{2} \mathbb{E}_{X_t \sim Q_t} [\text{Tr}(H_t(X_t)^2) - 2\text{Tr}(H_t(X_t)\nabla^2 \log q_t(X_t)) + \text{Tr}((\nabla^2 \log q_t(X_t))^2)] \end{aligned}$$

$$\begin{aligned}
& + \tilde{O}((1 - \alpha_t)^3) \\
& \stackrel{(iv)}{=} \frac{(1 - \alpha_t)^2}{2} \mathbb{E}_{X_t \sim Q_t} \|H_t(X_t) - \nabla^2 \log q_t(X_t)\|_F^2 + \tilde{O}((1 - \alpha_t)^3),
\end{aligned}$$

where (iv) follows because for two symmetric matrices  $A$  and  $B$ ,

$$\begin{aligned}
& \text{Tr}(A^2) - 2\text{Tr}(AB) + \text{Tr}(B^2) = \text{Tr}(A^2) - \text{Tr}(AB) - \text{Tr}(BA) + \text{Tr}(B^2) \\
& = \text{Tr}((A - B)(A - B)) = \text{Tr}((A - B)^\top(A - B)) = \|A - B\|_F^2.
\end{aligned}$$

Thus, following from Assumption 3,

$$\begin{aligned}
& \sum_{t=1}^T \mathbb{E}_{X_{t-1}, X_t \sim Q_{t-1,t}} \left[ \left( \log(\det(\hat{\Sigma}_t(X_t))) - \log(\det(\Sigma_t(X_t))) \right) \right. \\
& \quad \left. + (X_{t-1} - \mu_t(X_t))^\top (\hat{\Sigma}_t^{-1}(X_t) - \Sigma_t^{-1}(X_t)) (X_{t-1} - \mu_t(X_t)) \right] \lesssim \frac{\log^2 T}{T} \varepsilon_H^2. \quad (30)
\end{aligned}$$

Here  $\varepsilon_H$  is the Hessian estimation error. Combining (28) and (30) yields the desired result for the accelerated estimation error, which is in the order  $\tilde{O}(1/T^2)$ .

### F.3 PROOF OF COROLLARY 2

Given the perturbed  $\tilde{\Sigma}_t$  in (9), following the definition in (14), we define,  $\forall p \geq 1$ ,

$$\begin{aligned}
\tilde{A}_t & := (1 - \alpha_t) \nabla^2 \log q_t(x_t) + \frac{(1 - \alpha_t)^2}{4} (\nabla^2 \log q_t(x_t))^2 \\
& = (1 - \alpha_t) \left( \nabla^2 \log q_t(x_t) + \frac{1 - \alpha_t}{4} \nabla^2 \log q_t(x_t) \right), \\
\tilde{B}_t & := I_d - \frac{1 - \alpha_t}{\alpha_t} \tilde{\Sigma}_t^{-1} = I_d - \tilde{A}_t + \tilde{A}_t^2 + \tilde{O}_{\mathcal{L}^p(Q_t)}((1 - \alpha_t)^3) \\
\tilde{H}_t & := H_t + \frac{1 - \alpha_t}{4} H_t.
\end{aligned}$$

Note that under Assumption 3,

$$(1 - \alpha_t) \|\tilde{H}_t\| \lesssim (1 - \alpha_t) \|H_t\| + (1 - \alpha_t)^2 \|H_t\|^2 = \tilde{O}_{\mathcal{L}^r(Q_t)}(1 - \alpha_t), \quad \forall r \geq 1.$$

Then, the rest of the proof Lemma 4 still holds with  $\nabla^2 \log q_t(x_t)$  and  $H_t$  replaced by  $\nabla^2 \log q_t(x_t) + \frac{1 - \alpha_t}{4} \nabla^2 \log q_t(x_t)$  and  $\tilde{H}_t$ . The proof is complete by noting that

$$\begin{aligned}
& \mathbb{E}_{X_t \sim Q_t} \left\| \tilde{H}_t(X_t) - \left( \nabla^2 \log q_t(X_t) + \frac{1 - \alpha_t}{4} \nabla^2 \log q_t(X_t) \right) \right\|_F^2 \\
& \lesssim (1 + (1 - \alpha_t)) \mathbb{E}_{X_t \sim Q_t} \|H_t(X_t) - \nabla^2 \log q_t(X_t)\|_F^2 \\
& \lesssim \varepsilon_H^2.
\end{aligned}$$

### F.4 PROOF OF LEMMA 5

By Bayes' rule, for any  $x_{t-1}$  given fixed  $x_t$ , we have

$$\begin{aligned}
& q_{t-1|t}(x_{t-1}|x_t) \\
& \propto q_{t-1}(x_{t-1}) \exp\left(-\frac{\|x_t - \sqrt{\alpha_t} x_{t-1}\|^2}{2(1 - \alpha_t)}\right) \\
& \propto q_{t-1}(x_{t-1}) p'_{t-1|t}(x_{t-1}|x_t) \exp\left(\frac{1}{2}(x_{t-1} - \mu_t)^\top \Sigma_t^{-1}(x_{t-1} - \mu_t) - \frac{\|x_{t-1} - x_t/\sqrt{\alpha_t}\|^2}{2(1 - \alpha_t)/\alpha_t}\right) \\
& = q_{t-1}(x_{t-1}) p'_{t-1|t}(x_{t-1}|x_t) \exp\left(\frac{\alpha_t}{2(1 - \alpha_t)}(x_{t-1} - \mu_t)^\top (I_d - B_t)(x_{t-1} - \mu_t) - \frac{\|x_{t-1} - x_t/\sqrt{\alpha_t}\|^2}{2(1 - \alpha_t)/\alpha_t}\right)
\end{aligned}$$



(by Equation (14))

$$\propto p'_{t-1|t}(x_{t-1}|x_t) \exp\left(\zeta_{t,t-1}(x_t, x_{t-1}) - \frac{\alpha_t}{2(1-\alpha_t)}(x_{t-1} - \mu_t)^\top B_t(x_{t-1} - \mu_t)\right),$$

where the last line follows from the definition of  $\zeta_{t,t-1}(x_t, x_{t-1})$  in (16). Now, with the definition of  $\zeta'_{t,t-1}(x_t, x_{t-1})$  in (17), we have

$$q_{t-1|t}(x_{t-1}|x_t) = \frac{p'_{t-1|t}(x_{t-1}|x_t) e^{\zeta'_{t,t-1}(x_t, x_{t-1})}}{\mathbb{E}_{X_{t-1} \sim P'_{t-1|t}}[e^{\zeta'_{t,t-1}(x_t, X_{t-1})}]}$$

## F.5 PROOF OF LEMMA 6

Recall Equation (2). Let  $\tilde{Q}_0$  denote the distribution of  $\sqrt{\bar{\alpha}_t}x_0$ , and let  $g(z)$  denote the p.d.f. (w.r.t. the Lebesgue measure) of the distribution of  $\sqrt{1 - \bar{\alpha}_t}w_t$ . Note that  $g$  is a scaled version of the unit Gaussian p.d.f., and  $\int_{z \in \mathbb{R}^d} g(z) dz = 1 < \infty$ . Now, for any event  $A \subseteq \mathcal{B}(\lambda)$ ,

$$Q_t(A) = \int_{x \in A} \int_{\tilde{x}_0 \in \mathbb{R}^d} g(x - \tilde{x}_0) d\tilde{Q}_0(\tilde{x}_0) dx = \int_{\tilde{x}_0 \in \mathbb{R}^d} \left( \int_{x \in A} g(x - \tilde{x}_0) dx \right) d\tilde{Q}_0(\tilde{x}_0)$$

by Fubini's theorem. If  $A$  has Lebesgue measure 0, by continuity of  $g(x)$  we get  $\int_{x \in A} g(x - \tilde{x}_0) dx = 0$ , and thus  $Q_t(A) = 0$ . This shows that  $Q_t$  is absolutely continuous w.r.t. the Lebesgue measure, and its p.d.f. exists, denoted as  $q_t$ .

Now, since any order of derivative of the Gaussian p.d.f. is bounded away from infinity and  $\tilde{Q}_0$  is a probability measure, we can invoke the dominated convergence theorem here to change the order of derivative and integral as

$$\partial_{\mathbf{a}}^k q_t(x) = \partial_{\mathbf{a}}^k \int_{\tilde{x}_0 \in \mathbb{R}^d} g(x - \tilde{x}_0) d\tilde{Q}_0(\tilde{x}_0) = \int_{\tilde{x}_0 \in \mathbb{R}^d} \partial_{\mathbf{a}}^k g(x - \tilde{x}_0) d\tilde{Q}_0(\tilde{x}_0). \quad (31)$$

Thus, for any  $k \geq 1$  and any vector of indices  $\mathbf{a} \in [d]^k$ , we have

$$|\partial_{\mathbf{a}}^k q_t(x)| \leq \sup_{x \in \mathbb{R}^d} |\partial_{\mathbf{a}}^k g(x)| \int_{\tilde{x}_0 \in \mathbb{R}^d} d\tilde{Q}_0(\tilde{x}_0) = \sup_{x \in \mathbb{R}^d} |\partial_{\mathbf{a}}^k g(x)| < \infty.$$

This also implies that the Taylor term  $|T_k(q_t, x, \mu)| < \infty$  for any  $x$  and  $\mu$ , and

$$\begin{aligned} q_t(x) &= \int_{\tilde{x}_0 \in \mathbb{R}^d} g(x - \tilde{x}_0) d\tilde{Q}_0(\tilde{x}_0) \stackrel{(i)}{=} \int_{\tilde{x}_0 \in \mathbb{R}^d} \lim_{p \rightarrow \infty} \sum_{k=0}^p T_k(g(x - \tilde{x}_0), x, \mu) d\tilde{Q}_0(\tilde{x}_0) \\ &\stackrel{(ii)}{=} \lim_{p \rightarrow \infty} \int_{\tilde{x}_0 \in \mathbb{R}^d} \sum_{k=0}^p T_k(g(x - \tilde{x}_0), x, \mu) d\tilde{Q}_0(\tilde{x}_0) \\ &\stackrel{(iii)}{=} \lim_{p \rightarrow \infty} \sum_{k=0}^p T_k(q_t, x, \mu) \end{aligned}$$

where (i) follows because (scaled) Gaussian density is analytic, (ii) follows from dominated convergence theorem and the fact that  $g$  is a Gaussian density and has an upper bound independent of  $\tilde{x}_0$ , and (iii) follows from (31). This shows that  $q_t$  is analytic.

Finally, since  $\partial_{\mathbf{a}}^k \log q_t$  is a smooth function of  $q_t, \partial^1 q_t, \dots, \partial^k q_t$ , we have  $\partial_{\mathbf{a}}^k \log q_t(x_t) < \infty$  (possibly depending on  $T$ ) for all  $k \geq 1$  and fixed (finite)  $x_t \in \mathbb{R}^d$ . Also,  $\log q_t$  is analytic because  $\log(\cdot)$  is analytic and  $q_t(x_t) > 0, \forall x_t \in \mathbb{R}^d$ .

## F.6 PROOF OF LEMMA 7

The result follows directly from Isserlis's Theorem, which says that

$$\mathbb{E} \left[ \prod_{i=1}^n Z_i \right] = \sum_{p \in P_n^2} \prod_{\{i,j\} \in p} \mathbb{E}[Z_i Z_j] = \sum_{p \in P_n^2} \prod_{\{i,j\} \in p} \text{Cov}(Z_i, Z_j)$$

since each  $Z_i$  is centered. Here  $P_n^2$  is the set that contains all distinct size-2 partitions of  $[n]$ . For example,  $P_4^2 = \{\{1, 2\}, \{3, 4\}\}, \{\{1, 3\}, \{2, 4\}\}, \{\{1, 4\}, \{2, 3\}\}$ . Thus, since  $A_t = \tilde{O}_{\mathcal{L}^p(Q)}(1 - \alpha_t)$  under Assumption 5,

$$\begin{aligned} \mathbb{E} \left[ \prod_{i=1}^n Z_i \right] &= 0, \text{ if } n \text{ is odd} \\ \mathbb{E} \left[ \prod_{i=1}^n Z_i \right] &= \tilde{O}_{\mathcal{L}^p(Q_t)} \left( \left( \frac{1 - \alpha_t}{\alpha_t} \right)^{\frac{n}{2}} \right) = \tilde{O}_{\mathcal{L}^p(Q_t)} \left( (1 - \alpha_t)^{\frac{n}{2}} \right), \text{ if } n \text{ is even.} \end{aligned}$$

More specifically, following from Isserlis's Theorem, the fourth moment is

$$\begin{aligned} \mathbb{E}[Z_i Z_j Z_k Z_l] &= \text{Cov}(Z_i, Z_j) \text{Cov}(Z_k, Z_l) + \\ &\quad \text{Cov}(Z_i, Z_k) \text{Cov}(Z_j, Z_l) + \text{Cov}(Z_i, Z_l) \text{Cov}(Z_j, Z_k), \forall i, j, k, l \in [d]. \end{aligned}$$

Here  $\text{Cov}(Z_i, Z_j) = \frac{1 - \alpha_t}{\alpha_t} (\mathbb{1}\{i = j\} + (1 - \alpha_t) A^{ij})$ . The fourth moment result follows immediately by plugging into the formula. Turning to the sixth moment, we note that we are interested only in the coefficients for the terms that grow at a rate  $\tilde{O}_{\mathcal{L}^p(Q_t)}((1 - \alpha_t)^3)$ . Since the sixth moment consists of sum of product terms in which three covariance matrices are multiplied (giving us a rate at least  $\tilde{O}_{\mathcal{L}^p(Q_t)}((1 - \alpha_t)^3)$ ), at least one product term in the sum must take covariance values only on the diagonal of the matrix. Therefore, only  $\mathbb{E}[Z_i^6]$ ,  $\mathbb{E}[Z_i^4 Z_j^2]$ , and  $\mathbb{E}[Z_i^2 Z_j^2 Z_k^2]$  with  $i, j, k$  all differ satisfy this requirement, and we immediately get the desired result from Isserlis's Theorem.

## F.7 PROOF OF LEMMA 8

We first fix  $x_t$  and will take expectation at the end. Note that  $q_{t|t-1}(x_t|x_{t-1}) = \frac{1}{(2\pi(1-\alpha_t))^{d/2}} \exp\left(-\frac{\|x_t - \sqrt{\alpha_t}x_{t-1}\|^2}{2(1-\alpha_t)}\right)$ . Following from the idea of Tweedie Efron (2011), we have

$$\begin{aligned} & q_{t-1|t}(x_{t-1}|x_t) \\ &= \frac{q_{t-1}(x_{t-1})}{q_t(x_t)} q_{t|t-1}(x_t|x_{t-1}) \\ &= \frac{q_{t-1}(x_{t-1})}{q_t(x_t)} q_{t|t-1}(x_t|0) \exp\left(\frac{\sqrt{\alpha_t}}{1 - \alpha_t} x_t^\top x_{t-1} - \frac{\alpha_t}{2(1 - \alpha_t)} \|x_{t-1}\|^2\right) \\ &= \left(q_{t-1}(x_{t-1}) e^{-\frac{\alpha_t}{2(1-\alpha_t)} \|x_{t-1}\|^2}\right) \exp\left(\frac{\sqrt{\alpha_t}}{1 - \alpha_t} x_t^\top x_{t-1} - \log q_t(x_t) + \log q_{t|t-1}(x_t|0)\right) \\ &=: f(x_{t-1}) \exp(x_{t-1}^\top \tilde{x}_t - \kappa(\tilde{x}_t)) \end{aligned} \tag{32}$$

where we have used the definitions of  $\tilde{x}_t$  and  $\kappa(\tilde{x}_t)$  in (23). This shows that  $x_{t-1}$  is a conditional exponential family given  $\tilde{x}_t$ . Thus, the first moment can be found as (cf. Prop. 11.1 in Moulin & Veeravalli (2018))

$$\begin{aligned} 0 &= \nabla_{\tilde{x}_t} \int q_{t-1|t}(x_{t-1}|x_t) dx_{t-1} = \nabla_{\tilde{x}_t} \int f(x_{t-1}) \exp(x_{t-1}^\top \tilde{x}_t - \kappa(\tilde{x}_t)) dx_{t-1} \\ &= \int f(x_{t-1}) \nabla_{\tilde{x}_t} \exp(x_{t-1}^\top \tilde{x}_t - \kappa(\tilde{x}_t)) dx_{t-1} \\ &= \int f(x_{t-1}) \exp(x_{t-1}^\top \tilde{x}_t - \kappa(\tilde{x}_t)) (x_{t-1} - \nabla_{\tilde{x}_t} \kappa(\tilde{x}_t)) dx_{t-1} \\ &= \int f(x_{t-1}) \exp(x_{t-1}^\top \tilde{x}_t - \kappa(\tilde{x}_t)) x_{t-1} dx_{t-1} - \nabla_{\tilde{x}_t} \kappa(\tilde{x}_t) \end{aligned}$$

which implies that

$$\mathbb{E}_{X_{t-1} \sim Q_{t-1|t}} [X_{t-1}] = \nabla \kappa. \tag{33}$$

For the second moment,

$$0 = \partial_{ij}^2 \int q_{t-1|t}(x_{t-1}|x_t) dx_{t-1}$$

$$\begin{aligned}
&= \int f(x_{t-1}) \frac{\partial}{\partial \tilde{x}_t^j} \left( \exp(x_{t-1}^\top \tilde{x}_t - \kappa(\tilde{x}_t)) (x_{t-1}^i - \partial_i \kappa(\tilde{x}_t)) \right) dx_{t-1} \\
&= \int f(x_{t-1}) \exp(x_{t-1}^\top \tilde{x}_t - \kappa(\tilde{x}_t)) \left( (x_{t-1}^i - \partial_i \kappa(\tilde{x}_t))(x_{t-1}^j - \partial_j \kappa(\tilde{x}_t)) - \partial_{ij}^2 \kappa(\tilde{x}_t) \right) dx_{t-1}
\end{aligned}$$

which yields

$$\mathbb{E}_{X_{t-1} \sim Q_{t-1|t}} [(X_{t-1} - \mu_t)(X_{t-1} - \mu_t)^\top] = \nabla^2 \kappa = \frac{1 - \alpha_t}{\alpha_t} I_d + \frac{(1 - \alpha_t)^2}{\alpha_t} \nabla^2 \log q_t(x_t). \quad (34)$$

Below, we write  $x = x_{t-1}$  and  $\kappa = \kappa(\tilde{x}_t)$  for brevity. We remind readers that all derivatives are w.r.t.  $\tilde{x}_t$  instead of  $x = x_{t-1}$ . For the third moment,

$$0 = \partial_{ijk}^3 \int q_{t-1|t} dx =: \int f(x) \exp(x^\top \tilde{x}_t - \kappa) D_3(x, \tilde{x}_t) dx$$

where

$$\begin{aligned}
D_3(x, \tilde{x}_t) &= \exp(-x^\top \tilde{x}_t + \kappa) \partial_k \left( \exp(x^\top \tilde{x}_t - \kappa) ((x^i - \partial_i \kappa)(x^j - \partial_j \kappa) - \partial_{ij}^2 \kappa) \right) \\
&= (x^k - \partial_k \kappa) ((x^i - \partial_i \kappa)(x^j - \partial_j \kappa) - \partial_{ij}^2 \kappa) \\
&\quad + (-\partial_{ik}^2 \kappa)(x^j - \partial_j \kappa) + (-\partial_{jk}^2 \kappa)(x^i - \partial_i \kappa) - \partial_{ijk}^3 \kappa.
\end{aligned} \quad (35)$$

Now, for any function  $\text{fn}(\tilde{x}_t)$  and  $1 \leq i \leq d$ ,

$$\int f(x) \exp(x^\top \tilde{x}_t - \kappa) \text{fn}(\tilde{x}_t) (x^i - \partial_i \kappa) dx = 0$$

by the first moment result (33). Thus, we get

$$\mathbb{E}_{X_{t-1} \sim Q_{t-1|t}} [(X_{t-1}^i - \mu_t^i)(X_{t-1}^j - \mu_t^j)(X_{t-1}^k - \mu_t^k)] = \partial_{ijk}^3 \kappa,$$

and by Assumption 5,  $\mathbb{E}_{X_t \sim Q_t} [\partial_{ijk}^3 \kappa] = \tilde{O}((1 - \alpha_t)^3)$ .

For the fourth moment, we have

$$0 = \partial_{ijkl}^4 \int q_{t-1|t} dx =: \int f(x) \exp(x^\top \tilde{x}_t - \kappa) D_4(x, \tilde{x}_t) dx$$

where

$$\begin{aligned}
D_4(x, \tilde{x}_t) &= \exp(-x^\top \tilde{x}_t + \kappa) \partial_l \left( \exp(x^\top \tilde{x}_t - \kappa) ((x^i - \partial_i \kappa)(x^j - \partial_j \kappa)(x^k - \partial_k \kappa) \right. \\
&\quad \left. - \partial_{ij}^2 \kappa(x^k - \partial_k \kappa) - \partial_{ik}^2 \kappa(x^j - \partial_j \kappa) - \partial_{jk}^2 \kappa(x^i - \partial_i \kappa) - \partial_{ijk}^3 \kappa) \right) \\
&= (x^i - \partial_i \kappa)(x^j - \partial_j \kappa)(x^k - \partial_k \kappa)(x^l - \partial_l \kappa) + \partial_l \left( (x^i - \partial_i \kappa)(x^j - \partial_j \kappa)(x^k - \partial_k \kappa) \right) \\
&\quad - \partial_{ij}^2 \kappa(x^k - \partial_k \kappa)(x^l - \partial_l \kappa) - \partial_{ijl}^3 \kappa(x^k - \partial_k \kappa) + \partial_{ij}^2 \kappa \partial_{kl}^2 \kappa \\
&\quad - \partial_{ik}^2 \kappa(x^j - \partial_j \kappa)(x^l - \partial_l \kappa) - \partial_{ikl}^3 \kappa(x^j - \partial_j \kappa) + \partial_{ik}^2 \kappa \partial_{jl}^2 \kappa \\
&\quad - \partial_{jk}^2 \kappa(x^i - \partial_i \kappa)(x^l - \partial_l \kappa) - \partial_{jkl}^3 \kappa(x^i - \partial_i \kappa) + \partial_{jk}^2 \kappa \partial_{il}^2 \kappa \\
&\quad - \partial_{ijk}^3 \kappa(x^l - \partial_l \kappa) - \partial_{ijkl}^4 \kappa
\end{aligned} \quad (36)$$

and

$$\begin{aligned}
&\partial_l \left( (x^i - \partial_i \kappa)(x^j - \partial_j \kappa)(x^k - \partial_k \kappa) \right) \\
&= -\partial_{il}^2 \kappa(x^j - \partial_j \kappa)(x^k - \partial_k \kappa) - \partial_{jl}^2 \kappa(x^i - \partial_i \kappa)(x^k - \partial_k \kappa) - \partial_{kl}^2 \kappa(x^i - \partial_i \kappa)(x^j - \partial_j \kappa).
\end{aligned}$$

Using the first and second moment results in (33) and (34), we get

$$\begin{aligned}
\mathbb{E}_{X_{t-1} \sim Q_{t-1|t}} [(X_{t-1}^i - \mu_t^i)(X_{t-1}^j - \mu_t^j)(X_{t-1}^k - \mu_t^k)(X_{t-1}^l - \mu_t^l)] &= \\
&(\partial_{ij}^2 \kappa)(\partial_{kl}^2 \kappa) + (\partial_{ik}^2 \kappa)(\partial_{jl}^2 \kappa) + (\partial_{il}^2 \kappa)(\partial_{jk}^2 \kappa) + \partial_{ijkl}^4 \kappa.
\end{aligned}$$

And the fourth moment result follows directly by applying (34) to each of the terms and taking the expectation over  $X_t \sim Q_t$ . The rate follows from Assumption 5 (cf. Definition 2).

## F.8 PROOF OF LEMMA 9

The proof continues the idea of Lemma 8. The idea is to use the inductive relationship (provided in the proof of Lemmas 8 and 10):

$$\begin{aligned} D_5(x, \tilde{x}_t) &= \exp(-x^\top \tilde{x}_t + \kappa) \partial_m \left( \exp(x^\top \tilde{x}_t - \kappa) D_4(x, \tilde{x}_t) \right) \\ &= (x^m - \partial_m \kappa) D_4(x, \tilde{x}_t) + \partial_m D_4(x, \tilde{x}_t) \\ D_6(x, \tilde{x}_t) &= \exp(-x^\top \tilde{x}_t + \kappa) \partial_n \left( \exp(x^\top \tilde{x}_t - \kappa) D_5(x, \tilde{x}_t) \right) \\ &= (x^n - \partial_n \kappa) D_5(x, \tilde{x}_t) + \partial_n D_5(x, \tilde{x}_t). \end{aligned}$$

Let  $P_\ell^k$  be the set that contains all distinct size- $k$  partitions of  $[\ell]$ . We use the definitions:

$$\begin{aligned} \binom{A}{k} &:= \left\{ \{a_1, \dots, a_k\} : a_1, \dots, a_k \in A, a_1, \dots, a_k \text{ all differ} \right\}, k \leq |A| \\ \text{part}_k(A) &:= \left\{ (a_i, a_j) : \{i, j\} \in p : p \in P_{|A|}^k \right\}. \end{aligned}$$

Recall the formula for  $D_4$  in (36), which can be abbreviated as (here  $|\mathbf{a}| = 4$ ):

$$\begin{aligned} D_4(x, \tilde{x}_t) &= \prod_{i \in \mathbf{a}} (x^i - \partial_i \kappa) - \sum_{\mathbf{b} \in \binom{\mathbf{a}}{2}} \partial_{\mathbf{b}}^2 \kappa \prod_{i \in \mathbf{a} \setminus \mathbf{b}} (x^i - \partial_i \kappa) + \sum_{(\mathbf{b}, \mathbf{c}) \in \text{part}_2(\mathbf{a})} \partial_{\mathbf{b}}^2 \kappa \partial_{\mathbf{c}}^2 \kappa \\ &\quad - \sum_{i \in \mathbf{a}} \partial_{\mathbf{a} \setminus \{i\}}^3 \kappa (x^i - \partial_i \kappa) - \partial_{\mathbf{a}}^4 \kappa. \end{aligned}$$

Also recall the definition of  $f(x)$  in Lemma 8 and that  $\int f(x) e^{x^\top \tilde{x}_t - \kappa} D_p(x, \tilde{x}_t) dx = 0$ , through which we can find the expected  $p$ -th moments of  $\mathbb{E}_{X_{t-1} \sim Q_{t-1|t}} \left[ \prod_{i \in \mathbf{a}} (X_{t-1}^i - \mu_t^i) \right]$ . For reference, the first four moments are

$$\begin{aligned} \int f(x) \exp(x^\top \tilde{x}_t - \kappa) (x^i - \partial_i \kappa) dx &= 0 \\ \int f(x) \exp(x^\top \tilde{x}_t - \kappa) (x^i - \partial_i \kappa) (x^j - \partial_j \kappa) dx &= \partial_{ij}^2 \kappa = \tilde{O}_{\mathcal{L}^p(Q_t)}(1 - \alpha_t) \\ \int f(x) \exp(x^\top \tilde{x}_t - \kappa) (x^i - \partial_i \kappa) (x^j - \partial_j \kappa) (x^k - \partial_k \kappa) dx &= \partial_{ijk}^3 \kappa = \tilde{O}_{\mathcal{L}^p(Q_t)}((1 - \alpha_t)^3) \\ \int f(x) \exp(x^\top \tilde{x}_t - \kappa) (x^i - \partial_i \kappa) (x^j - \partial_j \kappa) (x^k - \partial_k \kappa) (x^l - \partial_l \kappa) dx \\ &= (\partial_{ij}^2 \kappa)(\partial_{kl}^2 \kappa) + (\partial_{ik}^2 \kappa)(\partial_{jl}^2 \kappa) + (\partial_{il}^2 \kappa)(\partial_{jk}^2 \kappa) + \partial_{ijkl}^4 \kappa = \tilde{O}_{\mathcal{L}^p(Q_t)}((1 - \alpha_t)^2) \end{aligned}$$

where we note that  $\partial_{\mathbf{a}}^k \kappa = \tilde{O}_{\mathcal{L}^p(Q_t)}((1 - \alpha_t)^k)$  for all  $k \geq 3$ .

We can calculate  $D_5$  as (with  $|\mathbf{a}| = 5$ ):

$$\begin{aligned} D_5(x, \tilde{x}_t) &= (x^{a_5} - \partial_{a_5} \kappa) D_4(x, \tilde{x}_t) + \partial_{a_5} D_4(x, \tilde{x}_t) \\ &= \prod_{i \in \mathbf{a}} (x^i - \partial_i \kappa) - \sum_{\mathbf{b} \in \binom{\mathbf{a}}{2}} \partial_{\mathbf{b}}^2 \kappa \prod_{i \in \mathbf{a} \setminus \mathbf{b}} (x^i - \partial_i \kappa) - \sum_{\mathbf{b} \in \binom{\mathbf{a}}{2}} \partial_{\mathbf{a} \setminus \mathbf{b}}^3 \kappa \prod_{i \in \mathbf{b}} (x^i - \partial_i \kappa) \\ &\quad + \sum_{\substack{i \in \mathbf{a} \\ (\mathbf{b}, \mathbf{c}) \in \text{part}_2(\mathbf{a} \setminus \{i\})}} \partial_{\mathbf{b}}^2 \kappa \partial_{\mathbf{c}}^2 \kappa (x^i - \partial_i \kappa) \\ &\quad - \sum_{i \in \mathbf{a}} \partial_{\mathbf{a} \setminus \{i\}}^4 \kappa (x^i - \partial_i \kappa) + \sum_{\mathbf{b} \in \binom{\mathbf{a}}{2}} \partial_{\mathbf{b}}^2 \kappa \partial_{\mathbf{a} \setminus \mathbf{b}}^3 \kappa - \partial_{\mathbf{a}}^5 \kappa. \end{aligned}$$

Therefore,

$$\mathbb{E}_{X_{t-1} \sim Q_{t-1|t}} \left[ \prod_{i \in \mathbf{a}: |\mathbf{a}|=5} (X_{t-1}^i - \mu_t^i) \right]$$

$$\begin{aligned}
&= \sum_{\mathbf{b} \in \binom{\mathbf{a}}{2}} \partial_{\mathbf{b}}^2 \kappa \partial_{\mathbf{a} \setminus \mathbf{b}}^3 \kappa + \sum_{\mathbf{b} \in \binom{\mathbf{a}}{2}} \partial_{\mathbf{a} \setminus \mathbf{b}}^3 \kappa \partial_{\mathbf{b}}^2 \kappa - \sum_{\mathbf{b} \in \binom{\mathbf{a}}{2}} \partial_{\mathbf{b}}^2 \kappa \partial_{\mathbf{a} \setminus \mathbf{b}}^3 \kappa + \partial_{\mathbf{a}}^5 \kappa \\
&= \sum_{\mathbf{b} \in \binom{\mathbf{a}}{2}} \partial_{\mathbf{b}}^2 \kappa \partial_{\mathbf{a} \setminus \mathbf{b}}^3 \kappa + \partial_{\mathbf{a}}^5 \kappa = \tilde{O}_{\mathcal{L}^p(Q_t)}((1 - \alpha_t)^4).
\end{aligned}$$

Now we turn to calculate  $D_6$  (and let  $|\mathbf{a}| = 6$ ):

$$\begin{aligned}
D_6(x, \tilde{x}_t) &= (x^{a_6} - \partial_{a_6} \kappa) D_5(x, \tilde{x}_t) + \partial_{a_6} D_5(x, \tilde{x}_t) \\
&= \prod_{i \in \mathbf{a}} (x^i - \partial_i \kappa) - \sum_{\mathbf{b} \in \binom{\mathbf{a}}{2}} \partial_{\mathbf{b}}^2 \kappa \prod_{i \in \mathbf{a} \setminus \mathbf{b}} (x^i - \partial_i \kappa) - \sum_{\mathbf{b} \in \binom{\mathbf{a}}{3}} \partial_{\mathbf{a} \setminus \mathbf{b}}^3 \kappa \prod_{i \in \mathbf{b}} (x^i - \partial_i \kappa) \\
&\quad - \sum_{\mathbf{b} \in \binom{\mathbf{a}}{2}} \partial_{\mathbf{a} \setminus \mathbf{b}}^4 \kappa \prod_{i \in \mathbf{b}} (x^i - \partial_i \kappa) + \sum_{(\mathbf{c}, \mathbf{e}) \in \text{part}_2(\mathbf{a} \setminus \mathbf{b})} \partial_{\mathbf{c}}^2 \kappa \partial_{\mathbf{e}}^2 \kappa \prod_{i \in \mathbf{b}} (x^i - \partial_i \kappa) + \sum_{i \in \mathbf{a}} \text{fn}(\kappa) (x^i - \partial_i \kappa) \\
&\quad - \sum_{(\mathbf{b}, \mathbf{c}, \mathbf{e}) \in \text{part}_2(\mathbf{a})} \partial_{\mathbf{b}}^2 \kappa \partial_{\mathbf{c}}^2 \kappa \partial_{\mathbf{e}}^2 \kappa + \sum_{\mathbf{b} \in \binom{\mathbf{a}}{2}} \partial_{\mathbf{b}}^2 \kappa \partial_{\mathbf{a} \setminus \mathbf{b}}^4 \kappa + \sum_{(\mathbf{b}, \mathbf{c}) \in \text{part}_3(\mathbf{a})} \partial_{\mathbf{b}}^3 \kappa \partial_{\mathbf{c}}^3 \kappa - \partial_{\mathbf{a}}^6 \kappa.
\end{aligned}$$

Here  $\text{fn}(\kappa)$  is a function of  $\kappa$  which does not depend on  $x$ . Note that  $\text{fn}$  does not affect the expected value because  $\mathbb{E}_{X_{t-1} \sim Q_{t-1|t}} [X_{t-1} - \mu_t] = 0$ . Therefore, we have

$$\begin{aligned}
&\mathbb{E}_{X_{t-1} \sim Q_{t-1|t}} \left[ \prod_{i \in \mathbf{a}: |\mathbf{a}|=6} (X_{t-1}^i - \mu_t^i) \right] \\
&= \sum_{\mathbf{b} \in \binom{\mathbf{a}}{2}} \partial_{\mathbf{b}}^2 \kappa \left( \sum_{(\mathbf{c}, \mathbf{e}) \in \text{part}_2(\mathbf{a} \setminus \mathbf{b})} \partial_{\mathbf{c}}^2 \kappa \partial_{\mathbf{e}}^2 \kappa + \partial_{\mathbf{a} \setminus \mathbf{b}}^4 \kappa \right) + \sum_{\mathbf{b} \in \binom{\mathbf{a}}{3}} \partial_{\mathbf{a} \setminus \mathbf{b}}^3 \kappa \partial_{\mathbf{b}}^3 \kappa \\
&\quad + \sum_{\mathbf{b} \in \binom{\mathbf{a}}{2}} \partial_{\mathbf{a} \setminus \mathbf{b}}^4 \kappa \partial_{\mathbf{b}}^2 \kappa - \sum_{(\mathbf{c}, \mathbf{e}) \in \text{part}_2(\mathbf{a} \setminus \mathbf{b})} \partial_{\mathbf{b}}^2 \kappa \partial_{\mathbf{c}}^2 \kappa \partial_{\mathbf{e}}^2 \kappa \\
&\quad + \sum_{(\mathbf{b}, \mathbf{c}, \mathbf{e}) \in \text{part}_2(\mathbf{a})} \partial_{\mathbf{b}}^2 \kappa \partial_{\mathbf{c}}^2 \kappa \partial_{\mathbf{e}}^2 \kappa - \sum_{\mathbf{b} \in \binom{\mathbf{a}}{2}} \partial_{\mathbf{b}}^2 \kappa \partial_{\mathbf{a} \setminus \mathbf{b}}^4 \kappa - \sum_{(\mathbf{b}, \mathbf{c}) \in \text{part}_3(\mathbf{a})} \partial_{\mathbf{b}}^3 \kappa \partial_{\mathbf{c}}^3 \kappa + \partial_{\mathbf{a}}^6 \kappa \\
&= \sum_{\mathbf{b} \in \binom{\mathbf{a}}{2}} \partial_{\mathbf{b}}^2 \kappa \partial_{\mathbf{a} \setminus \mathbf{b}}^4 \kappa + \sum_{(\mathbf{b}, \mathbf{c}) \in \text{part}_3(\mathbf{a})} \partial_{\mathbf{b}}^3 \kappa \partial_{\mathbf{c}}^3 \kappa + \sum_{(\mathbf{b}, \mathbf{c}, \mathbf{e}) \in \text{part}_2(\mathbf{a})} \partial_{\mathbf{b}}^2 \kappa \partial_{\mathbf{c}}^2 \kappa \partial_{\mathbf{e}}^2 \kappa + \partial_{\mathbf{a}}^6 \kappa \\
&= \sum_{(\mathbf{b}, \mathbf{c}, \mathbf{e}) \in \text{part}_2(\mathbf{a})} \partial_{\mathbf{b}}^2 \kappa \partial_{\mathbf{c}}^2 \kappa \partial_{\mathbf{e}}^2 \kappa + \tilde{O}_{\mathcal{L}^p(Q_t)}((1 - \alpha_t)^5).
\end{aligned}$$

The proof is now complete.

## F.9 PROOF OF LEMMA 10

We fix  $x_t$  first and will take the expectation at the end. We first introduce some notations used in the proof. We write  $x = x_{t-1}$  and  $\kappa = \kappa(\tilde{x}_t)$ . Given a set of indices  $A$ , define its bipartition as

$$\text{bipart}(A) := \{(B, C) : A = B \sqcup C\}$$

where  $B$  and  $C$  are both *sets* of indices (and therefore the order of indices within each of  $B$  and  $C$  does not matter). Here  $\sqcup$  refers to the *disjoint* union of the two sets (which is only defined when the two sets are disjoint). Next, given a set  $B$ , define  $\text{allpart}_{\geq 2}(B)$  as a set containing all partitions of  $B$  such that there are *at least 2* elements in each part of the partition. As an example,  $\text{allpart}_{\geq 2}(\{1, 2, 3, 4\}) = \{\{\{1, 2\}, \{3, 4\}\}, \{\{1, 3\}, \{2, 4\}\}, \{\{1, 4\}, \{2, 3\}\}, \text{ and } \{\{1\}, \{2, 3, 4\}\} \notin \text{allpart}_{\geq 2}(\{1, 2, 3, 4\})$  despite the fact that it is a valid partition. For each partition  $b \in \text{allpart}_{\geq 2}(B)$ , define

$$\partial_b \kappa := \prod_{\xi \in b} \partial_{a_\xi}^{|\xi|} \kappa.$$

Here note that  $\xi$  is also a set, and  $\partial_b \kappa$  is well defined since the order of indices to take partial derivative with does not matter. Define

$$D_0(x, \tilde{x}_t) := 1$$

$$D_p(x, \tilde{x}_t) := \exp(-x^\top \tilde{x}_t + \kappa) \partial_{a_p} \left( \exp(x^\top \tilde{x}_t - \kappa) D_{p-1}(x, \tilde{x}_t) \right)$$

for all  $p \geq 1$ . We again remind readers that all derivatives are w.r.t.  $\tilde{x}_t$  instead of  $x = x_{t-1}$ .

By working out the derivative, a direct implication of the definition of  $D_p$  is a recursive relationship:

$$D_p(x, \tilde{x}_t) = (x^{a_p} - \partial_{a_p} \kappa) D_{p-1}(x, \tilde{x}_t) + \partial_{a_p} D_{p-1}(x, \tilde{x}_t).$$

Also, if we unroll the recursion of  $D_p$ , we get

$$\begin{aligned} D_p(x, \tilde{x}_t) &= \exp(-x^\top \tilde{x}_t + \kappa) \partial_{a_p} \left( \exp(x^\top \tilde{x}_t - \kappa) D_{p-1}(x, \tilde{x}_t) \right) \\ &= \exp(-x^\top \tilde{x}_t + \kappa) \partial_{a_p} \left( \exp(x^\top \tilde{x}_t - \kappa) \exp(-x^\top \tilde{x}_t + \kappa) \right. \\ &\quad \left. \partial_{a_{p-1}} \left( \exp(x^\top \tilde{x}_t - \kappa) D_{p-2}(x, \tilde{x}_t) \right) \right) \\ &= \exp(-x^\top \tilde{x}_t + \kappa) \partial_{a_p, a_{p-1}}^2 \left( \exp(x^\top \tilde{x}_t - \kappa) D_{p-2}(x, \tilde{x}_t) \right) \\ &= \exp(-x^\top \tilde{x}_t + \kappa) \partial_{a_p, \dots, a_1}^p \left( \exp(x^\top \tilde{x}_t - \kappa) \right) \end{aligned}$$

and thus

$$\begin{aligned} 0 &= \partial_{a_1, \dots, a_p}^p \int q_{t-1|t} dx = \int f(x) \partial_{a_1, \dots, a_p}^p \left( \exp(x^\top \tilde{x}_t - \kappa) \right) dx \\ &= \int f(x) \exp(x^\top \tilde{x}_t - \kappa) D_p(x, \tilde{x}_t) dx \end{aligned} \quad (37)$$

where we recall the definition of  $f(x)$  back in (32).

In the following, we present the entire proof into two parts. In part 1, we inductively show that each  $D_p(x, \tilde{x}_t)$  satisfies a particular polynomial form. In part 2, we inductively show that this polynomial form results in the desired rates.

**Part 1 of the proof of Lemma 10:** The first step toward proving the desired results is to obtain the form of  $D_p$  for all  $p \geq 2$ . Now, we aim to show inductively that

$$D_p(x, \tilde{x}_t) = \prod_{i=1}^p (x^{a_i} - \partial_{a_i} \kappa) - \sum_{(B,C) \in \text{bipart}([p])} \sum_{b \in \text{allpart}_{\geq 2}(B)} d_p(b, C) (\partial_b \kappa) \prod_{c \in C} (x^{a_c} - \partial_{a_c} \kappa) \quad (38)$$

where  $d_p(b, C)$  is a constant from combinatorics, which is possibly 0 and which only depends on  $p$ . From Lemma 8, the bases cases have been established that (cf. (35) and (36))

$$D_2(x, \tilde{x}_t) = (x^i - \partial_i \kappa)(x^j - \partial_j \kappa) - \partial_{ij}^2 \kappa$$

$$D_3(x, \tilde{x}_t) = (x^i - \partial_i \kappa)(x^j - \partial_j \kappa)(x^k - \partial_k \kappa)$$

$$- \partial_{ij}^2 \kappa (x^k - \partial_k \kappa) - \partial_{ik}^2 \kappa (x^j - \partial_j \kappa) - \partial_{jk}^2 \kappa (x^i - \partial_i \kappa) - \partial_{ijk}^3 \kappa$$

$$D_4(x, \tilde{x}_t) = (x^i - \partial_i \kappa)(x^j - \partial_j \kappa)(x^k - \partial_k \kappa)(x^l - \partial_l \kappa)$$

$$- \partial_{ij}^2 \kappa (x^k - \partial_k \kappa)(x^l - \partial_l \kappa) - \partial_{ik}^2 \kappa (x^j - \partial_j \kappa)(x^l - \partial_l \kappa) - \partial_{jk}^2 \kappa (x^i - \partial_i \kappa)(x^l - \partial_l \kappa)$$

$$+ \partial_l((x^i - \partial_i \kappa)(x^j - \partial_j \kappa)(x^k - \partial_k \kappa)) - \partial_{ijk}^3 \kappa (x^l - \partial_l \kappa) - \partial_{ijl}^3 \kappa (x^k - \partial_k \kappa)$$

$$- \partial_{ikl}^3 \kappa (x^j - \partial_j \kappa) - \partial_{jkl}^3 \kappa (x^i - \partial_i \kappa) + \partial_{ij}^2 \kappa \partial_{kl}^2 \kappa + \partial_{ik}^2 \kappa \partial_{jl}^2 \kappa + \partial_{jk}^2 \kappa \partial_{il}^2 \kappa - \partial_{ijkl}^4 \kappa.$$

In particular, each term of  $D_p$  ( $p = 2, 3, 4$ ) is in the form of either  $\prod_{i=1}^p (x^{a_i} - \partial_{a_i} \kappa)$  or  $(\partial_b \kappa) \prod_{c \in C} (x^{a_c} - \partial_{a_c} \kappa)$ , where  $|\xi| \geq 2$ ,  $\forall \xi \in b$ , and  $(\sqcup_{\xi \in b} \xi) \sqcup C = [p]$ . Therefore,  $D_2, D_3, D_4$  all satisfy the hypothesis (38).

Turning to the inductive step, we suppose that  $D_k$  satisfies (38), i.e.,

$$D_k(x, \tilde{x}_t) = \prod_{i=1}^k (x^{a_i} - \partial_{a_i} \kappa) - \sum_{(B,C) \in \text{bipart}([k])} \sum_{b \in \text{allpart}_{\geq 2}(B)} d_k(b, C) (\partial_b \kappa) \prod_{c \in C} (x^{a_c} - \partial_{a_c} \kappa).$$

Then, using the recursive relationship, we have

$$\begin{aligned} D_{k+1}(x, \tilde{x}_t) &= (x^{a_{k+1}} - \partial_{a_{k+1}} \kappa) D_k(x, \tilde{x}_t) + \partial_{a_{k+1}} D_k(x, \tilde{x}_t) \\ &= \underbrace{\prod_{i=1}^{k+1} (x^{a_i} - \partial_{a_i} \kappa)}_{T_1} - \underbrace{\sum_{(B,C) \in \text{bipart}([k])} \sum_{b \in \text{allpart}_{\geq 2}(B)} d_k(b, C) (\partial_b \kappa) \prod_{c \in C} (x^{a_c} - \partial_{a_c} \kappa) (x^{a_{k+1}} - \partial_{a_{k+1}} \kappa)}_{T_2} \\ &\quad - \underbrace{\partial_{a_{k+1}} \left( - \prod_{i=1}^k (x^{a_i} - \partial_{a_i} \kappa) \right)}_{T_3} - \underbrace{\sum_{(B,C) \in \text{bipart}([k])} \sum_{b \in \text{allpart}_{\geq 2}(B)} d_k(b, C) (\partial_b \kappa) \left( \partial_{a_{k+1}} \prod_{c \in C} (x^{a_c} - \partial_{a_c} \kappa) \right)}_{T_4} \\ &\quad - \underbrace{\sum_{(B,C) \in \text{bipart}([k])} \sum_{b \in \text{allpart}_{\geq 2}(B)} d_k(b, C) (\partial_{a_{k+1}} (\partial_b \kappa)) \prod_{c \in C} (x^{a_c} - \partial_{a_c} \kappa)}_{T_5} \\ &= T_1 - T_2 - T_3 - T_4 - T_5 \end{aligned}$$

where we define each term as  $T_1, \dots, T_5$ . Now we discuss these terms separately:

1.  $T_1$  (and only  $T_1$ ) is in the form  $\prod_{i=1}^{k+1} (x^{a_i} - \partial_{a_i} \kappa)$ .
2.  $T_2$  is a summation of individual terms:  $(\partial_b \kappa) \prod_{c \in C} (x^{a_c} - \partial_{a_c} \kappa) (x^{a_{k+1}} - \partial_{a_{k+1}} \kappa)$ . Here  $b \in \text{allpart}_{\geq 2}(B)$  and  $(B, C) \in \text{bipart}([k])$ . Thus, by definition of bipart and  $\text{allpart}_{\geq 2}$ , for each  $\xi \in b$ ,  $|\xi| \geq 2$  and  $(\sqcup_{\xi \in b} \xi) \sqcup C = [k]$ . Therefore,  $k+1 \notin B \sqcup C$  and

$$(\sqcup_{\xi \in b} \xi) \sqcup C \sqcup \{k+1\} = [k] \sqcup \{k+1\} = [k+1].$$

This implies that each individual term of  $T_2$  is in the form of  $(\partial_b \kappa) \prod_{c \in C_2} (x^c - \partial_c \kappa)$  where  $b \in \text{allpart}_{\geq 2}(B_2)$ , such that  $B_2 := B$  and  $C_2 := C \sqcup \{k+1\}$ . Here  $C_2$  is well defined because  $k+1 \notin C$ . Since  $(B_2, C_2) \in \text{bipart}([k+1])$ ,

$$T_2 = \sum_{(B,C) \in \text{bipart}([k+1])} \sum_{b \in \text{allpart}_{\geq 2}(B)} d_2(b, C) (\partial_b \kappa) \prod_{c \in C} (x^{a_c} - \partial_{a_c} \kappa)$$

for some constant  $d_2(b, C)$ .

3.  $T_3$  is the derivative of product, which is a summation of individual terms:  $(\partial_{a_j, a_{k+1}}^2 \kappa) \prod_{i=1, i \neq j}^k (x^{a_i} - \partial_{a_i} \kappa)$ ,  $j = 1, \dots, k$ . Therefore, for each  $j = 1, \dots, k$ , each term is of the form  $(\partial_b \kappa) \prod_{c \in C_3} (x^{a_c} - \partial_{a_c} \kappa)$  where  $b \in \text{allpart}_{\geq 2}(B_3)$ , such that  $B_3 := \{j, k+1\}$  and  $C_3 := [k] \setminus \{j\}$ . Since  $(B_3, C_3) \in \text{bipart}([k+1])$ ,

$$T_3 = \sum_{(B,C) \in \text{bipart}([k+1])} \sum_{b \in \text{allpart}_{\geq 2}(B)} d_3(b, C) (\partial_b \kappa) \prod_{c \in C} (x^{a_c} - \partial_{a_c} \kappa)$$

for some constant  $d_3(b, C)$ .

4.  $T_4$  is a summation of individual terms:  $(\partial_b \kappa) (\partial_{a_{k+1}} \prod_{c \in C} (x^{a_c} - \partial_{a_c} \kappa))$  where  $b \in \text{allpart}_{\geq 2}(B)$  and  $(B, C) \in \text{bipart}([k])$ . Now,

$$(\partial_b \kappa) \left( \partial_{a_{k+1}} \prod_{c \in C} (x^{a_c} - \partial_{a_c} \kappa) \right) = -(\partial_b \kappa) (\partial_{a_j, a_{k+1}}^2 \kappa) \prod_{\substack{i \in C \\ i \neq c}} (x^{a_i} - \partial_{a_i} \kappa)$$

1998  
1999  
2000  
2001  
2002  
2003  
2004  
2005  
2006  
2007  
2008  
2009  
2010  
2011  
2012  
2013  
2014  
2015  
2016  
2017  
2018  
2019  
2020  
2021  
2022  
2023  
2024  
2025  
2026  
2027  
2028  
2029  
2030  
2031  
2032  
2033  
2034  
2035  
2036  
2037  
2038  
2039  
2040  
2041  
2042  
2043  
2044  
2045  
2046  
2047  
2048  
2049  
2050  
2051

$$= -(\partial_{b_4} \kappa) \prod_{i \in C_4} (x^{a_i} - \partial_{a_i} \kappa)$$

where  $b_4 := b \sqcup \{k+1, c\}$  and  $C_4 := C \setminus \{c\}$ . Here  $b_4$  is well defined because  $k+1, c \notin b$ . Define  $B_4 := [k+1] \setminus C_4$ , and we have  $b_4 \in \text{allpart}_{\geq 2}(B_4)$ . Since  $(B_4, C_4)$  is a valid partition of  $[k+1]$ , we have

$$T_4 = \sum_{(B,C) \in \text{bipart}([k+1])} \sum_{b \in \text{allpart}_{\geq 2}(B)} d_4(b, C) (\partial_b \kappa) \prod_{c \in C} (x^{a_c} - \partial_{a_c} \kappa)$$

for some constant  $d_4(b, C)$ .

5.  $T_5$  is a summation of individual terms:  $(\partial_{a_{k+1}} (\partial_b \kappa)) \prod_{c \in C} (x^{a_c} - \partial_{a_c} \kappa)$ , where  $b \in \text{allpart}_{\geq 2}(B)$  and  $(B, C) \in \text{bipart}([k])$ . From definition of  $\partial_b \kappa$ ,

$$\partial_{a_{k+1}} (\partial_b \kappa) = \partial_{a_{k+1}} \left( \prod_{\xi \in b} \partial_{a_\xi}^{|\xi|} \kappa \right) = \sum_{\xi \in b} \left( \partial_{a_\xi, a_{k+1}}^{|\xi|+1} \kappa \right) \prod_{\substack{\zeta \in b \\ \zeta \neq \xi}} \partial_{a_\zeta}^{|\zeta|} \kappa = \sum_{\xi \in b} \partial_{b_\xi} \kappa$$

where, for each  $\xi \in b$ , we have defined a new partition  $b_\xi$  such that  $k+1$  is added to the  $\xi$  in the partition  $b$ . Formally, define  $b_\xi := b \setminus \xi \sqcup \{\xi \sqcup \{k+1\}\}$ , which is well defined because  $\xi \notin (b \setminus \xi)$  and  $k+1 \notin B$ . Define  $B_5 := B \sqcup \{k+1\}$  and  $C_5 := C$ , and note that  $(B_5, C_5)$  is a valid partition of  $[k+1]$ . Since  $|\zeta| \geq 2, \forall \zeta \in b$ , we have  $|\zeta'| \geq 2, \forall \zeta' \in b_\xi$ . Since  $b \in \text{allpart}_{\geq 2}(B)$ , we have  $b_\xi \in \text{allpart}_{\geq 2}(B_5)$  for all  $\xi \in b$ . Therefore, for any fixed  $C (= C_5)$

$$\begin{aligned} \sum_{b \in \text{allpart}_{\geq 2}(B)} d_k(b, C) (\partial_{a_{k+1}} (\partial_b \kappa)) &= \sum_{b \in \text{allpart}_{\geq 2}(B)} \sum_{\xi \in b} d_k(b, C) \partial_{b_\xi} \kappa \\ &= \sum_{b_5 \in \text{allpart}_{\geq 2}(B_5)} d_5(b_5, C) \partial_{b_5} \kappa \end{aligned}$$

for some constant  $d_5(b_5, C)$ , and thus

$$T_5 = \sum_{(B,C) \in \text{bipart}([k+1])} \sum_{b \in \text{allpart}_{\geq 2}(B)} d_5(b, C) (\partial_b \kappa) \prod_{c \in C} (x^{a_c} - \partial_{a_c} \kappa).$$

Finally, letting

$$d_{k+1}(b, C) := \sum_{j=2}^5 d_j(b, C)$$

for each  $b \in \text{allpart}_{\geq 2}(B)$  and  $C$  such that  $(B, C) \in \text{bipart}([k+1])$ , we have shown that if  $D_k(x, \tilde{x}_t)$  is in the form of (38),  $D_{k+1}(x, \tilde{x}_t)$  is also in this form. Thus, claim (38) is valid for all  $p \geq 2$ .

**Part 2 of the proof of Lemma 10:** First, we remind readers of the definition of  $\kappa(\tilde{x}_t)$  in (23). Also, the partial derivatives within the expectation over  $X_t \sim Q_t$  do not affect the rate by Assumption 5. Note that  $\nabla \kappa = \mu_t$  from direct differentiation. From (37) and (38), for fixed  $x_t$ , we have

$$\begin{aligned} &\mathbb{E}_{X_{t-1} \sim Q_{t-1|t}} \left[ \prod_{i=1}^p (X_{t-1}^{a_i} - \mu_t^{a_i}) \right] \\ &= \tilde{O} \left( \sup_{\substack{(B,C) \in \text{bipart}([p]) \\ b \in \text{allpart}_{\geq 2}(B)}} \partial_b \kappa(\tilde{x}_t) \mathbb{E}_{X_{t-1} \sim Q_{t-1|t}} \left[ \prod_{c \in C} (X_{t-1}^{a_c} - \mu_t^{a_c}) \right] \right) \\ &= \tilde{O} \left( \sup_{(B,C) \in \text{bipart}([p])} \left( \sup_{b \in \text{allpart}_{\geq 2}(B)} \partial_b \kappa(\tilde{x}_t) \right) \mathbb{E}_{X_{t-1} \sim Q_{t-1|t}} \left[ \prod_{c \in C} (X_{t-1}^{a_c} - \mu_t^{a_c}) \right] \right). \quad (39) \end{aligned}$$



We first consider the term  $\sup_{b \in \text{allpart}_{\geq 2}(B)} \partial_b \kappa(\tilde{x}_t)$ . Given a partition  $b \in \text{allpart}_{\geq 2}(B)$ , direct differentiation yields

$$\partial_{\alpha_\xi}^{|\xi|} \kappa = \frac{1 - \alpha_t}{\alpha_t} + \frac{(1 - \alpha_t)^2}{\alpha_t} \partial_{\alpha_\xi}^2 \log q_t(x_t) = \tilde{O}(1 - \alpha_t), \quad \text{if } |\xi| = 2 \text{ and } \xi_1 = \xi_2$$

$$\partial_{\alpha_\xi}^{|\xi|} \kappa = \frac{(1 - \alpha_t)^{|\xi|}}{\alpha_t^{|\xi|/2}} \partial_\xi^{|\xi|} \log q_t(x_t) = \tilde{O}((1 - \alpha_t)^{|\xi|}), \quad \text{for all other } \xi.$$

Since by definition  $\partial_b \kappa = \prod_{\xi \in b} \partial_{\alpha_\xi}^{|\xi|} \kappa$  and  $\sqcup_{\xi \in b} \xi = B$ , the slowest rate of  $\partial_b \kappa$  (as a function of  $B$ ) is determined by the partition  $b$  containing the most number of equal pairs. The slowest rate is

$$\sup_{b \in \text{allpart}_{\geq 2}(B)} \partial_b \kappa(\tilde{x}_t) = \begin{cases} \tilde{O}((1 - \alpha_t)^{(|B|-1)/2} (1 - \alpha_t)^3) = \tilde{O}((1 - \alpha_t)^{(|B|+5)/2}) & \text{if } |B| \text{ is odd} \\ \tilde{O}((1 - \alpha_t)^{|B|/2}) & \text{if } |B| \text{ is even} \end{cases}$$

To proceed, we will again use induction to find the overall rate. From Lemma 8, base cases have been established that

$$\mathbb{E}_{X_{t-1}, X_t \sim Q_{t-1,t}} \left[ \prod_{i=1}^2 (X_{t-1}^{a_i} - \mu_t^{a_i}) \right] = \tilde{O}(1 - \alpha_t), \quad \forall a \in [d]^2$$

$$\mathbb{E}_{X_{t-1}, X_t \sim Q_{t-1,t}} \left[ \prod_{i=1}^3 (X_{t-1}^{a_i} - \mu_t^{a_i}) \right] = \tilde{O}((1 - \alpha_t)^3), \quad \forall a \in [d]^3$$

$$\mathbb{E}_{X_{t-1}, X_t \sim Q_{t-1,t}} \left[ \prod_{i=1}^4 (X_{t-1}^{a_i} - \mu_t^{a_i}) \right] = \tilde{O}((1 - \alpha_t)^2), \quad \forall a \in [d]^4.$$

These rates satisfy (24) and (25) when  $p = 2, 3, 4$ . Now we turn to the inductive step. Suppose  $k \geq 4$  is even. For purpose of induction, suppose (24) and (25) hold for all  $p = 2, \dots, k$ . Then, following (39), for  $p = k + 1$  (odd number), we have

$$\begin{aligned} & \mathbb{E}_{X_{t-1}, X_t \sim Q_{t-1,t}} \left[ \prod_{i=1}^{k+1} (X_{t-1}^{a_i} - \mu_t^{a_i}) \right] \\ &= O \left( \sup_{\substack{(B,C) \in \text{bipart}([k+1]) \\ |B| \text{ odd}, |C| \text{ even}}} (1 - \alpha_t)^{(|B|+5)/2} (1 - \alpha_t)^{|C|/2} \right. \\ & \quad \left. + \sup_{\substack{(B,C) \in \text{bipart}([k+1]) \\ |B| \text{ even}, |C| \text{ odd}}} (1 - \alpha_t)^{|B|/2} (1 - \alpha_t)^{(|C|+3)/2} \right) \\ &= O \left( (1 - \alpha_t)^{(k+1)/2+5/2} + (1 - \alpha_t)^{(k+1)/2+3/2} \right) \\ &= O \left( (1 - \alpha_t)^{(k+1)/2+3/2} \right). \end{aligned}$$

Then, for  $p = k + 2$  (even number), we have

$$\begin{aligned} & \mathbb{E}_{X_{t-1}, X_t \sim Q_{t-1,t}} \left[ \prod_{i=1}^{k+2} (X_{t-1}^{a_i} - \mu_t^{a_i}) \right] \\ &= O \left( \sup_{\substack{(B,C) \in \text{bipart}([k+2]) \\ |B| \text{ odd}, |C| \text{ odd}}} (1 - \alpha_t)^{(|B|+5)/2} (1 - \alpha_t)^{(|C|+3)/2} \right. \\ & \quad \left. + \sup_{\substack{(B,C) \in \text{bipart}([k+1]) \\ |B| \text{ even}, |C| \text{ even}}} (1 - \alpha_t)^{|B|/2} (1 - \alpha_t)^{|C|/2} \right) \\ &= O \left( (1 - \alpha_t)^{(k+2)/2+4} + (1 - \alpha_t)^{(k+2)/2} \right) \\ &= O \left( (1 - \alpha_t)^{(k+2)/2} \right). \end{aligned}$$

These show the validity of the claims (24) and (25). The proof is now complete.

## F.10 PROOF OF LEMMA 11

Before analyzing the rate of each moment, we need to guarantee the validity of exchanging the limit (in the Taylor expansion) and the expectation operator. Intuitively, this is achievable under Assumption 5, where the Taylor series is absolutely convergent in expectation due to its Gaussian-like moments. Specifically, since  $\log q_{t-1}$  is analytic, all its partial derivatives exist. Following from the Taylor expansion of  $\zeta'_{t,t-1}$  in (20),

$$\begin{aligned}
& \lim_{k \rightarrow \infty} \left| \mathbb{E}_{\substack{X_t \sim Q_t \\ X_{t-1} \sim P'_{t-1|t}}} [\zeta'_{t,t-1}] - \mathbb{E}_{\substack{X_t \sim Q_t \\ X_{t-1} \sim P'_{t-1|t}}} \left[ T_1(\log q_{t-1}, X_{t-1}, \mu_t) + T_2'(\log q_{t-1}, X_{t-1}, \mu_t) \right. \right. \\
& \quad \left. \left. + \sum_{p=3}^k T_p(\log q_{t-1}, X_{t-1}, \mu_t) \right] \right| \\
& \leq \lim_{k \rightarrow \infty} \mathbb{E}_{\substack{X_t \sim Q_t \\ X_{t-1} \sim P'_{t-1|t}}} \left| \zeta'_{t,t-1} - T_1(\log q_{t-1}, X_{t-1}, \mu_t) - T_2'(\log q_{t-1}, X_{t-1}, \mu_t) \right. \\
& \quad \left. - \sum_{p=3}^k T_p(\log q_{t-1}, X_{t-1}, \mu_t) \right| \\
& \leq \lim_{k \rightarrow \infty} \mathbb{E}_{\substack{X_t \sim Q_t \\ X_{t-1} \sim P'_{t-1|t}}} \left[ \sum_{p=k+1}^{\infty} |T_p(\log q_{t-1}, X_{t-1}, \mu_t)| \right] \\
& \stackrel{(i)}{\leq} \lim_{k \rightarrow \infty} \liminf_{\ell \rightarrow \infty} \sum_{p=k+1}^{\ell} \mathbb{E}_{\substack{X_t \sim Q_t \\ X_{t-1} \sim P'_{t-1|t}}} |T_p(\log q_{t-1}, X_{t-1}, \mu_t)| \\
& \stackrel{(ii)}{=} 0.
\end{aligned}$$

Here (i) follows from Fatou's lemma, and (ii) is because, under Assumption 5 and Lemma 7, we have  $\mathbb{E}_{\substack{X_t \sim Q_t \\ X_{t-1} \sim P'_{t-1|t}}} |T_p(\log q_{t-1}, X_{t-1}, \mu_t)| = \tilde{O}(T^{-p/2})$ , and thus the infinite sum is convergent for all  $(k, \ell)$  such that  $1 \leq k < \ell < \infty$  since

$$\sum_{p=1}^{\infty} \mathbb{E}_{\substack{X_t \sim Q_t \\ X_{t-1} \sim P'_{t-1|t}}} |T_p(\log q_{t-1}, x_{t-1}, \mu_t)| = \tilde{O} \left( \sum_{p=1}^{\infty} \frac{1}{p!} \cdot \frac{d^p}{T^{p/2}} \right) < \infty.$$

The proof for  $\mathbb{E}_{\substack{X_t \sim Q_t \\ X_{t-1} \sim Q_{t-1|t}}}$  is similar due to its Gaussian-like concentration of all centralized moments (see Lemma 10). Thus, we are able to exchange the infinite sum and the expectation under either  $P'_{t-1|t} \times Q_t$  or  $Q_{t-1,t}$ .

Next, we put together the rates of the conditional moments. We use abbreviated notations as  $T_p = T_p(\log q_{t-1}, X_{t-1}, \mu_t)$ . To investigate the dominant term, we analyze the expected difference of the first 8 moments in the Taylor expansion (20) separately. First, for any fixed  $x_t$ ,

$$\mathbb{E}_{X_{t-1} \sim Q_{t-1|t}} [T_1] = 0 = \mathbb{E}_{X_{t-1} \sim P'_{t-1|t}} [T_1].$$

Also, for  $T_2'$ , note that for any random variable  $Z$  (regardless of its distribution) with  $\mathbb{E}Z = 0$  and  $\text{Cov}(Z) = \Sigma$ , the mean of the quadratic form (with fixed matrix  $\Xi$ ) is

$$\mathbb{E}[Z^\top \Xi Z] = \mathbb{E}[\text{Tr}(Z^\top \Xi Z)] = \text{Tr}(\Xi \Sigma).$$

This implies that, for any fixed  $x_t$ ,

$$\begin{aligned}
\mathbb{E}_{X_{t-1} \sim P'_{t-1|t}} [T_2'] &= \frac{1}{2} \mathbb{E}_{X_{t-1} \sim P'_{t-1|t}} \left[ (X_{t-1} - \mu_t)^\top \left( \nabla^2 \log q_{t-1}(\mu_t) - \frac{\alpha_t}{1 - \alpha_t} B_t \right) (X_{t-1} - \mu_t) \right] \\
&= \frac{1}{2} \text{Tr} \left( \left( \nabla^2 \log q_{t-1}(\mu_t) - \frac{\alpha_t}{1 - \alpha_t} B_t \right) \Sigma_t \right) \\
&= \frac{1}{2} \mathbb{E}_{X_{t-1} \sim Q_{t-1|t}} \left[ (X_{t-1} - \mu_t)^\top \left( \nabla^2 \log q_{t-1}(\mu_t) - \frac{\alpha_t}{1 - \alpha_t} B_t \right) (X_{t-1} - \mu_t) \right]
\end{aligned}$$

2160  
2161  
2162  
2163  
2164  
2165  
2166  
2167  
2168  
2169  
2170  
2171  
2172  
2173  
2174  
2175  
2176  
2177  
2178  
2179  
2180  
2181  
2182  
2183  
2184  
2185  
2186  
2187  
2188  
2189  
2190  
2191  
2192  
2193  
2194  
2195  
2196  
2197  
2198  
2199  
2200  
2201  
2202  
2203  
2204  
2205  
2206  
2207  
2208  
2209  
2210  
2211  
2212  
2213

$$= \mathbb{E}_{X_{t-1} \sim Q_{t-1|t}} [T'_2].$$

Using Lemmas 7 and 8, the rate for  $T_3$  is

$$\begin{aligned} & \mathbb{E}_{X_t \sim Q_t} \left( \mathbb{E}_{X_{t-1} \sim Q_{t-1|t}} - \mathbb{E}_{X_{t-1} \sim P'_{t-1|t}} \right) [T_3(\log q_{t-1}, X_{t-1}, \mu_t)] \\ &= \mathbb{E}_{X_{t-1}, X_t \sim Q_{t-1,t}} [T_3(\log q_{t-1}, X_{t-1}, \mu_t)] \\ &= \frac{(1 - \alpha_t)^3}{3! \alpha_t^{3/2}} \sum_{i,j,k=1}^d \mathbb{E}_{X_t \sim Q_t} [\partial_{ijk}^3 \log q_{t-1}(\mu_t(X_t)) \partial_{ijk}^3 \log q_t(X_t)]. \end{aligned}$$

Using Lemmas 7 and 10, and when the partial derivatives satisfy Assumption 5, the rate for  $T_5$ ,  $T_7$ , and  $T_p$  ( $p \geq 8$ ) can also be determined:

$$\begin{aligned} & \mathbb{E}_{X_t \sim Q_t} \left( \mathbb{E}_{X_{t-1} \sim Q_{t-1|t}} - \mathbb{E}_{X_{t-1} \sim P'_{t-1|t}} \right) [T_5(\log q_{t-1}, X_{t-1}, \mu_t)] \\ &= \mathbb{E}_{X_{t-1}, X_t \sim Q_{t-1,t}} [T_5(\log q_{t-1}, X_{t-1}, \mu_t)] \\ &= \tilde{O}((1 - \alpha_t)^4), \\ & \mathbb{E}_{X_t \sim Q_t} \left( \mathbb{E}_{X_{t-1} \sim Q_{t-1|t}} - \mathbb{E}_{X_{t-1} \sim P'_{t-1|t}} \right) [T_7(\log q_{t-1}, X_{t-1}, \mu_t)] \\ &= \mathbb{E}_{X_{t-1}, X_t \sim Q_{t-1,t}} [T_7(\log q_{t-1}, X_{t-1}, \mu_t)] \\ &= \tilde{O}((1 - \alpha_t)^5), \\ & \mathbb{E}_{X_t \sim Q_t} \left( \mathbb{E}_{X_{t-1} \sim Q_{t-1|t}} - \mathbb{E}_{X_{t-1} \sim P'_{t-1|t}} \right) [T_p(\log q_{t-1}, X_{t-1}, \mu_t)] \\ &= \tilde{O}((1 - \alpha_t)^4), \quad \forall p \geq 8. \end{aligned}$$

The remaining orders are  $T_4$  and  $T_6$ . The following proof will draw from the results in Lemmas 7 to 9. Fix  $p \geq 1$ . Write  $Z_i = X_{t-1}^i - \mu_t^i$  and  $A^{ij} = [A_t]^{ij}$  for  $i, j \in [d]$ . For  $T_4$ , let  $i, j, k, l \in [d]$  all differ, and the difference (in expectation) of each term of  $T_4$  is

$$\begin{aligned} & \mathbb{E}_{X_{t-1} \sim Q_{t-1|t}} [Z_i^4] - \mathbb{E}_{X_{t-1} \sim P'_{t-1|t}} [Z_i^4] \\ &= 3 \left( \frac{1 - \alpha_t}{\alpha_t} \right)^2 + 6 \frac{(1 - \alpha_t)^3}{\alpha_t^2} \partial_{ii}^2 \log q_t(x_t) - 3 \left( \frac{1 - \alpha_t}{\alpha_t} \right)^2 (1 + A^{ii})^2 + \tilde{O}_{\mathcal{L}^p(Q_t)}((1 - \alpha_t)^4) \\ &= -3 \left( \frac{1 - \alpha_t}{\alpha_t} \right)^2 (A^{ii})^2 + \tilde{O}_{\mathcal{L}^p(Q_t)}((1 - \alpha_t)^4), \\ & \mathbb{E}_{X_{t-1} \sim Q_{t-1|t}} [Z_i^3 Z_j] - \mathbb{E}_{X_{t-1} \sim P'_{t-1|t}} [Z_i^3 Z_j] \\ &= 3 \frac{(1 - \alpha_t)^3}{\alpha_t^2} \partial_{ij}^2 \log q_t(x_t) - 3 \left( \frac{1 - \alpha_t}{\alpha_t} \right)^2 A^{ij} (1 + A^{ii}) + \tilde{O}_{\mathcal{L}^p(Q_t)}((1 - \alpha_t)^4) \\ &= -3 \left( \frac{1 - \alpha_t}{\alpha_t} \right)^2 A^{ij} A^{ii} + \tilde{O}_{\mathcal{L}^p(Q_t)}((1 - \alpha_t)^4), \\ & \mathbb{E}_{X_{t-1} \sim Q_{t-1|t}} [Z_i^2 Z_j^2] - \mathbb{E}_{X_{t-1} \sim P'_{t-1|t}} [Z_i^2 Z_j^2] \\ &= \left( \frac{1 - \alpha_t}{\alpha_t} \right)^2 + \frac{(1 - \alpha_t)^3}{\alpha_t^2} (\partial_{ii}^2 \log q_t(x_t) + \partial_{jj}^2 \log q_t(x_t)) - \left( \frac{1 - \alpha_t}{\alpha_t} \right)^2 (1 + A^{ii})(1 + A^{jj}) \\ &\quad + \tilde{O}_{\mathcal{L}^p(Q_t)}((1 - \alpha_t)^4) \\ &= - \left( \frac{1 - \alpha_t}{\alpha_t} \right)^2 A^{ii} A^{jj} + \tilde{O}_{\mathcal{L}^p(Q_t)}((1 - \alpha_t)^4), \\ & \mathbb{E}_{X_{t-1} \sim Q_{t-1|t}} [Z_i^2 Z_j Z_k] - \mathbb{E}_{X_{t-1} \sim P'_{t-1|t}} [Z_i^2 Z_j Z_k] \\ &= \frac{(1 - \alpha_t)^3}{\alpha_t^2} \partial_{jk}^2 \log q_t(x_t) - \left( \frac{1 - \alpha_t}{\alpha_t} \right)^2 (1 + A^{ii}) A^{jk} + \tilde{O}_{\mathcal{L}^p(Q_t)}((1 - \alpha_t)^4) \\ &= - \frac{(1 - \alpha_t)^2}{\alpha_t^2} A^{ii} A^{jk} + \tilde{O}_{\mathcal{L}^p(Q_t)}((1 - \alpha_t)^4), \end{aligned}$$

$$\mathbb{E}_{X_{t-1} \sim Q_{t-1|t}}[Z_i Z_j Z_k Z_l] - \mathbb{E}_{X_{t-1} \sim P'_{t-1|t}}[Z_i Z_j Z_k Z_l] = \tilde{O}_{\mathcal{L}^p(Q_t)}((1 - \alpha_t)^4).$$

Recall from (14) that  $A_t = (1 - \alpha_t) \nabla^2 \log q_t(x_t) = \tilde{O}_{\mathcal{L}^p(Q_t)}(1 - \alpha_t)$  under Assumption 5. Hence, many low-order terms above are cancelled, and we get

$$\left( \mathbb{E}_{X_{t-1} \sim Q_{t-1|t}} - \mathbb{E}_{X_{t-1} \sim P'_{t-1|t}} \right) [T_4(\log q_{t-1}, X_{t-1}, \mu_t)] = \tilde{O}_{\mathcal{L}^p(Q_t)}((1 - \alpha_t)^4).$$

Now we turn to  $T_6$ . Let  $i, j, k \in [d]$  all differ, and the difference (in expectation) of each lowest-order term of  $T_6$  is

$$\begin{aligned} & \mathbb{E}_{X_{t-1} \sim Q_{t-1|t}}[Z_i^6] - \mathbb{E}_{X_{t-1} \sim P'_{t-1|t}}[Z_i^6] \\ &= 15 \left( \frac{1 - \alpha_t}{\alpha_t} \right)^3 - 15 \left( \frac{1 - \alpha_t}{\alpha_t} \right)^3 (1 + A^{ii})^3 + \tilde{O}_{\mathcal{L}^p(Q_t)}((1 - \alpha_t)^4), \\ & \mathbb{E}_{X_{t-1} \sim Q_{t-1|t}}[Z_i^4 Z_j^2] - \mathbb{E}_{X_{t-1} \sim P'_{t-1|t}}[Z_i^4 Z_j^2] \\ &= 3 \left( \frac{1 - \alpha_t}{\alpha_t} \right)^3 - 3 \left( \frac{1 - \alpha_t}{\alpha_t} \right)^3 (1 + A^{ii})^2 (1 + A^{jj}) + \tilde{O}_{\mathcal{L}^p(Q_t)}((1 - \alpha_t)^4), \\ & \mathbb{E}_{X_{t-1} \sim Q_{t-1|t}}[Z_i^2 Z_j^2 Z_k^2] - \mathbb{E}_{X_{t-1} \sim P'_{t-1|t}}[Z_i^2 Z_j^2 Z_k^2] \\ &= \left( \frac{1 - \alpha_t}{\alpha_t} \right)^3 - \left( \frac{1 - \alpha_t}{\alpha_t} \right)^3 (1 + A^{ii})(1 + A^{jj})(1 + A^{kk}) + \tilde{O}_{\mathcal{L}^p(Q_t)}((1 - \alpha_t)^4). \end{aligned}$$

Also, by Lemmas 7 and 9, the rest of the terms already satisfy  $\tilde{O}_{\mathcal{L}^p(Q_t)}((1 - \alpha_t)^4)$  under Assumption 5. The low-order terms cancel in the same way as for  $T_4$ , and thus,

$$\left( \mathbb{E}_{X_{t-1} \sim Q_{t-1|t}} - \mathbb{E}_{X_{t-1} \sim P'_{t-1|t}} \right) [T_6(\log q_{t-1}, X_{t-1}, \mu_t)] = \tilde{O}_{\mathcal{L}^p(Q_t)}((1 - \alpha_t)^4).$$

Therefore, the lowest order term above is  $T_3$ , whose order is  $\tilde{O}_{\mathcal{L}^p(Q_t)}((1 - \alpha_t)^3)$ . The proof is now complete.

### F.11 PROOF OF COROLLARY 3

The proof is very similar to Lemma 11 and (21), except with a perturbed covariance matrix. We employ the notations  $\tilde{A}_t$  and  $\tilde{B}_t$  from Remark 3. Here we have that  $\tilde{A}_t(X_t) = A_t(X_t) + \Xi_t(X_t)$ , and thus,  $\forall r \geq 1$ ,

$$\begin{aligned} \tilde{B}_t(X_t) &= B_t(X_t) + \tilde{O}_{\mathcal{L}^r(Q_t)}((1 - \alpha_t)^2) = A_t(X_t) + \tilde{O}_{\mathcal{L}^r(Q_t)}((1 - \alpha_t)^2) \\ &= (1 - \alpha_t) \nabla^2 \log q_t(X_t) + \tilde{O}_{\mathcal{L}^r(Q_t)}((1 - \alpha_t)^2). \end{aligned}$$

Compare with the proof of Lemma 11, the only difference is the expected difference of  $T'_2$ . Since  $\tilde{A}_t(X_t) = A_t(X_t) + \tilde{O}_{\mathcal{L}^r(Q_t)}((1 - \alpha_t)^2)$  and  $\tilde{B}_t(X_t) = B_t(X_t) + \tilde{O}_{\mathcal{L}^r(Q_t)}((1 - \alpha_t)^2)$ , the expected differences of all higher order  $T'_p$ 's have the same rate as the non-perturbed case.

Now, for any fixed  $x_t$  and  $r \geq 1$ ,

$$\begin{aligned} & \mathbb{E}_{X_{t-1} \sim P'_{t-1|t}}[T'_2] \\ &= \frac{1}{2} \mathbb{E}_{X_{t-1} \sim P'_{t-1|t}} \left[ (X_{t-1} - \mu_t)^\top \left( \nabla^2 \log q_{t-1}(\mu_t) - \frac{\alpha_t}{1 - \alpha_t} \tilde{B}_t \right) (X_{t-1} - \mu_t) \right] \\ &= \frac{1}{2} \text{Tr} \left( \left( \nabla^2 \log q_{t-1}(\mu_t) - \frac{\alpha_t}{1 - \alpha_t} \tilde{B}_t \right) \tilde{\Sigma}_t \right), \end{aligned}$$

and, from Lemma 8,

$$\begin{aligned} & \mathbb{E}_{X_{t-1} \sim Q_{t-1|t}}[T'_2] \\ &= \frac{1}{2} \mathbb{E}_{X_{t-1} \sim Q_{t-1|t}} \left[ (X_{t-1} - \mu_t)^\top \left( \nabla^2 \log q_{t-1}(\mu_t) - \frac{\alpha_t}{1 - \alpha_t} \tilde{B}_t \right) (X_{t-1} - \mu_t) \right] \\ &= \frac{1}{2} \text{Tr} \left( \left( \nabla^2 \log q_{t-1}(\mu_t) - \frac{\alpha_t}{1 - \alpha_t} \tilde{B}_t \right) \Sigma_t \right). \end{aligned}$$

Thus,

$$\begin{aligned}
& \left( \mathbb{E}_{X_{t-1} \sim Q_{t-1|t}} - \mathbb{E}_{X_{t-1} \sim P'_{t-1|t}} \right) [T'_2(\log q_{t-1}, X_{t-1}, \mu_t)] \\
&= \frac{1}{2} \text{Tr} \left( \left( \nabla^2 \log q_{t-1}(\mu_t) - \frac{\alpha_t}{1 - \alpha_t} \tilde{B}_t \right) (\Sigma_t - \tilde{\Sigma}_t) \right) \\
&= -\frac{1 - \alpha_t}{2\alpha_t} \text{Tr} \left( \left( \nabla^2 \log q_{t-1}(\mu_t) - \frac{\alpha_t}{1 - \alpha_t} \tilde{B}_t \right) \Xi_t \right) \\
&= -\frac{1 - \alpha_t}{2\alpha_t} \text{Tr} \left( (\nabla^2 \log q_{t-1}(\mu_t) - \alpha_t \nabla^2 \log q_t(X_t)) \Xi_t \right) + \tilde{O}_{\mathcal{L}^r(Q_t)}((1 - \alpha_t)^4).
\end{aligned}$$

Note that here the first term is in the order  $\tilde{O}_{\mathcal{L}^r(Q_t)}((1 - \alpha_t)^3)$  under Assumption 5 since  $\Xi_t(X_t) = \tilde{O}_{\mathcal{L}^r(Q_t)}((1 - \alpha_t)^2)$ . Therefore, under the perturbed case,

$$\begin{aligned}
& \mathbb{E}_{X_t \sim Q_t} \left( \mathbb{E}_{X_{t-1} \sim Q_{t-1|t}} - \mathbb{E}_{X_{t-1} \sim P'_{t-1|t}} \right) [\zeta'_{t,t-1}] \\
&= -\frac{1 - \alpha_t}{2\alpha_t} \mathbb{E}_{X_t \sim Q_t} \text{Tr} \left( (\nabla^2 \log q_{t-1}(\mu_t(X_t)) - \alpha_t \nabla^2 \log q_t(X_t)) \Xi_t(X_t) \right) \\
&+ \frac{(1 - \alpha_t)^3}{3! \alpha_t^{3/2}} \sum_{i,j,k=1}^d \mathbb{E}_{X_t \sim Q_t} [\partial_{ijk}^3 \log q_{t-1}(\mu_t(X_t)) \partial_{ijk}^3 \log q_t(X_t)] \\
&+ \tilde{O}((1 - \alpha_t)^4).
\end{aligned}$$

The final result can be achieved using (21). The proof is complete.

## F.12 PROOF OF LEMMA 12

From (1), the forward process at the first step is

$$x_1 = \sqrt{\alpha_1} x_0 + \sqrt{1 - \alpha_1} w_1$$

where  $w_1 \sim \mathcal{N}(0, I_d)$  is independent of  $Q_0$ . Thus,

$$\begin{aligned}
\mathbb{E}_{X_1 \sim Q_1, X_0 \sim Q_0} \|X_1 - X_0\|^2 &= \mathbb{E}_{W_1 \sim \mathcal{N}(0, I_d), X_0 \sim Q_0} \|\sqrt{1 - \alpha_1} W_1 + (\sqrt{\alpha_1} - 1) X_0\|^2 \\
&\stackrel{(i)}{=} \mathbb{E}_{W_1 \sim \mathcal{N}(0, I_d)} \|\sqrt{1 - \alpha_1} W_1\|^2 + \mathbb{E}_{X_0 \sim Q_0} \|(\sqrt{\alpha_1} - 1) X_0\|^2 \\
&\stackrel{(ii)}{\leq} (1 - \alpha_1) d + (\sqrt{\alpha_1} - 1)^2 M_2 d \\
&\stackrel{(iii)}{\leq} (1 - \alpha_1) (M_2 + 1) d
\end{aligned}$$

where (i) follows from independence, (ii) follows from Assumption 1, and (iii) follows because  $(\sqrt{z} - 1)^2 \leq 1 - z$  for all  $z \in [0, 1]$ . The proof is complete since  $W_2(Q_0, Q_1)^2 \leq \mathbb{E}_{X_1 \sim Q_1, X_0 \sim Q_0} \|X_1 - X_0\|^2$  by the definition of Wasserstein-2 distance.

## G PROOF OF THEOREMS 2 TO 4 AND 5

In this section, we instantiate Theorem 1 (along with Corollary 1) to provide upper bounds that have explicit parameter dependency for a number of interesting distribution classes. In order to obtain an upper bound that explicitly depends on system parameters, we need only to provide an explicit bound on the reverse-step error, which is the main topic that we address in the following subsections.

### G.1 PROOF OF THEOREM 2

We first introduce some relevant notations. Given that  $Q_0$  is Gaussian mixture, the p.d.f. of  $q_t$  at each time  $t \geq 1$  can be calculated as

$$\begin{aligned}
q_t(x) &= \int_{x_0 \in \mathbb{R}^d} q_{t|0}(x|x_0) \sum_{n=1}^N \pi_n q_{0,n}(x_0) dx_0 \\
&= \sum_{n=1}^N \pi_n \int_{x_0 \in \mathbb{R}^d} q_{t|0}(x|x_0) q_{0,n}(x_0) dx_0 =: \sum_{n=1}^N \pi_n q_{t,n}(x).
\end{aligned}$$

Since the convolution of two Gaussian density is still Gaussian, we have that  $q_{t,n}$  is the p.d.f. of  $\mathcal{N}(\mu_{t,n}, \Sigma_{t,n})$ , where  $\mu_{t,n} := \sqrt{\bar{\alpha}_t} \mu_{0,n}$  and  $\Sigma_{t,n} := \bar{\alpha}_t \Sigma_{0,n} + (1 - \bar{\alpha}_t) I_d$ . Note that  $\Sigma_{t,n}$  has full rank.

### G.1.1 CHECKING ASSUMPTION 4

We first verify Assumption 4 for Gaussian mixture  $Q_0$  for any  $\alpha_t$  that satisfies Definition 1. The intuition is that its Gaussian-like tail (for all  $t \geq 0$ ) is sufficient to control all higher-order derivatives of  $\log q_t$ .

In the following, Lemma 13 provides an upper bound on any order of partial derivative of a Gaussian mixture density for any fixed  $x_t$ , as long as each mixture component is well controlled. This directly implies that the partial derivatives are also well controlled in expectation, and thus we verify Assumption 4 for Gaussian mixture in Lemma 14.

**Lemma 13.** *Let  $g(x|z)$  be the conditional Gaussian p.d.f. of  $\mathcal{N}(\mu_z, \Sigma_z)$ . Define  $q(x) := \int g(x|z)d\Pi(z)$ , where  $\Pi(z)$  is a mixing distribution (and denote  $\mathcal{Z}$  its support). Suppose  $b := \sup_{z \in \mathcal{Z}} \|\mu_z\| < \infty$ , and suppose the following conditions on  $\Sigma_z$  hold for all  $z \in \mathcal{Z}$ :*

1. *There exist  $u, U \in \mathbb{R}$  such that  $u \leq \det(\Sigma_z) \leq U$ ;*
2. *There exists  $V \in \mathbb{R}$  such that  $\|\Sigma_z^{-1}\| \leq V$ ;*
3. *There exists  $w \in \mathbb{R}$  such that  $\sup_{z \in \mathcal{Z}, i, j \in [d]^2} \left| [\Sigma_z^{-\frac{1}{2}}]^{ij} \right| \leq w$ .*

Then,

$$|\partial_a^k \log q(x)| \leq \min \left\{ C^k B_k \frac{d^{2k} \max\{w, 1\}^k}{u^{k/2}} U^k e^{k \frac{V}{2} (\|x\|^2 + b^2)}, B_k \frac{d^{2k} \max\{w, 1\}^k}{u^{k/2}} |\text{poly}_k(x)| \right\},$$

where  $B_k$  is the Bell number,  $C$  is some constant, and  $\text{poly}_k(x)$  is some  $k$ -th order polynomial in  $x$ .

*Proof.* See Appendix H.1. □

**Lemma 14.** *When  $Q_0$  is Gaussian mixture (see Theorem 2), Assumption 4 is satisfied.*

*Proof.* See Appendix H.2. □

### G.1.2 EXPRESSING $\partial_{ijk}^3 \log q_t$

Now we continue from Theorem 1 to work for an explicit dependency on  $d$ . We first calculate the second partial derivative of its log-p.d.f. as

$$\begin{aligned} & \nabla^2 \log q_t(x) \\ &= \frac{1}{q_t^2(x)} \left( q_t(x) \left( \sum_n \pi_n q_{t,n}(x) (\Sigma_{t,n}^{-1}(x - \mu_{t,n})(x - \mu_{t,n})^\top \Sigma_{t,n}^{-1} - \Sigma_{t,n}^{-1}) \right) \right. \\ & \quad \left. - \left( \sum_n \pi_n q_{t,n}(x) \Sigma_{t,n}^{-1}(x - \mu_{t,n}) \right) \left( \sum_n \pi_n q_{t,n}(x) \Sigma_{t,n}^{-1}(x - \mu_{t,n}) \right)^\top \right). \end{aligned} \quad (40)$$

Now write  $z_{t,n}(x) := \Sigma_{t,n}^{-1}(x - \mu_{t,n})$ . Note that  $\partial_k z_{t,n}^i = [\Sigma_{t,n}^{-1}]^{ik}$ , and that  $\partial_k q_{t,n}(x) = q_{t,n}(x)(-z_{t,n}^k(x))$ . We can rewrite (40) as

$$\begin{aligned} \partial_{ij}^2 \log q_t(x) &= \frac{1}{q_t^2(x)} \left( q_t(x) \underbrace{\sum_{n=1}^N \pi_n q_{t,n}(x) \left( z_{t,n}^i(x) z_{t,n}^j(x) - [\Sigma_{t,n}^{-1}]^{ij} \right)}_{\text{N1}} \right. \\ & \quad \left. - \underbrace{\left( \sum_n \pi_n q_{t,n}(x) z_{t,n}^i(x) \right)}_{\text{N2}} \left( \sum_n \pi_n q_{t,n}(x) z_{t,n}^j(x) \right) \right). \end{aligned}$$

To calculate the third partial derivative of its log-p.d.f., we need first to calculate the partial derivative of N1 and N2. The derivative for N1 is given by

$$\partial_k \sum_{n=1}^N \pi_n q_{t,n}(x) \left( z_{t,n}^i(x) z_{t,n}^j(x) - [\Sigma_{t,n}^{-1}]^{ij} \right)$$

$$\begin{aligned}
&= \sum_{n=1}^N \pi_n q_{t,n}(x) (-z_{t,n}^k(x)) \left( z_{t,n}^i(x) z_{t,n}^j(x) - [\Sigma_{t,n}^{-1}]^{ij} \right) \\
&\quad + \sum_{n=1}^N \pi_n q_{t,n}(x) [\Sigma_{t,n}^{-1}]^{ik} z_{t,n}^j(x) + \pi_n q_{t,n}(x) [\Sigma_{t,n}^{-1}]^{jk} z_{t,n}^i(x),
\end{aligned}$$

and the derivative for term N2 is given by

$$\begin{aligned}
&\partial_k \left( \sum_{n=1}^N \pi_n q_{t,n}(x) z_{t,n}^i(x) \sum_{n=1}^N \pi_n q_{t,n}(x) z_{t,n}^j(x) \right) \\
&= \sum_{n=1}^N \pi_n q_{t,n}(x) \left( (-z_{t,n}^k(x)) z_{t,n}^i(x) + [\Sigma_{t,n}^{-1}]^{ik} \right) \sum_{n=1}^N \pi_n q_{t,n}(x) z_{t,n}^j(x) \\
&\quad + \sum_{n=1}^N \pi_n q_{t,n}(x) z_{t,n}^i(x) \sum_{n=1}^N \pi_n q_{t,n}(x) \left( (-z_{t,n}^k(x)) z_{t,n}^j(x) + [\Sigma_{t,n}^{-1}]^{jk} \right).
\end{aligned}$$

Combining these, the derivative for the numerator is

$$\begin{aligned}
&\partial_k (q_t(x) \text{N1} - \text{N2}) = \partial_k (q_t(x)) \text{N1} + q_t(x) \partial_k (\text{N1}) - \partial_k (\text{N2}) \\
&= - \sum_{n=1}^N \pi_n q_{t,n}(x) z_{t,n}^k(x) \sum_{n=1}^N \pi_n q_{t,n}(x) \left( z_{t,n}^i(x) z_{t,n}^j(x) - [\Sigma_{t,n}^{-1}]^{ij} \right) \\
&\quad + q_t(x) \left( \sum_{n=1}^N \pi_n q_{t,n}(x) (-z_{t,n}^k(x)) \left( z_{t,n}^i(x) z_{t,n}^j(x) - [\Sigma_{t,n}^{-1}]^{ij} \right) \right. \\
&\quad \left. + \pi_n q_{t,n}(x) [\Sigma_{t,n}^{-1}]^{ik} z_{t,n}^j(x) + \pi_n q_{t,n}(x) [\Sigma_{t,n}^{-1}]^{jk} z_{t,n}^i(x) \right) \\
&\quad - \sum_{n=1}^N \pi_n q_{t,n}(x) \left( (-z_{t,n}^k(x)) z_{t,n}^i(x) + [\Sigma_{t,n}^{-1}]^{ik} \right) \sum_{n=1}^N \pi_n q_{t,n}(x) z_{t,n}^j(x) \\
&\quad - \sum_{n=1}^N \pi_n q_{t,n}(x) z_{t,n}^i(x) \sum_{n=1}^N \pi_n q_{t,n}(x) \left( (-z_{t,n}^k(x)) z_{t,n}^j(x) + [\Sigma_{t,n}^{-1}]^{jk} \right) \\
&= -q_t(x) \sum_{n=1}^N \pi_n q_{t,n}(x) z_{t,n}^i(x) z_{t,n}^j(x) z_{t,n}^k(x) - \sum_{n=1}^N \pi_n q_{t,n}(x) z_{t,n}^k(x) \sum_{n=1}^N \pi_n q_{t,n}(x) z_{t,n}^i(x) z_{t,n}^j(x) \\
&\quad + \sum_{n=1}^N \pi_n q_{t,n}(x) z_{t,n}^j(x) \sum_{n=1}^N \pi_n q_{t,n}(x) z_{t,n}^i(x) z_{t,n}^k(x) + \sum_{n=1}^N \pi_n q_{t,n}(x) z_{t,n}^i(x) \sum_{n=1}^N \pi_n q_{t,n}(x) z_{t,n}^j(x) z_{t,n}^k(x) \\
&\quad + q_t(x) \sum_{n=1}^N \pi_n q_{t,n}(x) [\Sigma_{t,n}^{-1}]^{ij} z_{t,n}^k(x) + \sum_{n=1}^N \pi_n q_{t,n}(x) [\Sigma_{t,n}^{-1}]^{ij} \sum_{n=1}^N \pi_n q_{t,n}(x) z_{t,n}^k(x) \\
&\quad + q_t(x) \sum_{n=1}^N \pi_n q_{t,n}(x) [\Sigma_{t,n}^{-1}]^{ik} z_{t,n}^j(x) - \sum_{n=1}^N \pi_n q_{t,n}(x) [\Sigma_{t,n}^{-1}]^{ik} \sum_{n=1}^N \pi_n q_{t,n}(x) z_{t,n}^j(x) \\
&\quad + q_t(x) \sum_{n=1}^N \pi_n q_{t,n}(x) [\Sigma_{t,n}^{-1}]^{jk} z_{t,n}^i(x) - \sum_{n=1}^N \pi_n q_{t,n}(x) z_{t,n}^i(x) \sum_{n=1}^N \pi_n q_{t,n}(x) [\Sigma_{t,n}^{-1}]^{jk}.
\end{aligned}$$

Since

$$\begin{aligned}
&\partial_{ijk}^3 \log q_t(x) = \partial_k \left( \frac{q_t(x) \text{N1} - \text{N2}}{q_t^2(x)} \right) \\
&= \frac{1}{q_t^3(x)} \left( \partial_k (q_t(x) \text{N1} - \text{N2}) q_t(x) + 2(q_t(x) \text{N1} - \text{N2}) \sum_{n=1}^N \pi_n q_{t,n}(x) z_{t,n}^k(x) \right),
\end{aligned}$$

2430  
2431  
2432  
2433  
2434  
2435  
2436  
2437  
2438  
2439  
2440  
2441  
2442  
2443  
2444  
2445  
2446  
2447  
2448  
2449  
2450  
2451  
2452  
2453  
2454  
2455  
2456  
2457  
2458  
2459  
2460  
2461  
2462  
2463  
2464  
2465  
2466  
2467  
2468  
2469  
2470  
2471  
2472  
2473  
2474  
2475  
2476  
2477  
2478  
2479  
2480  
2481  
2482  
2483

we get

$$\begin{aligned}
& q_t^3(x) \partial_{ijk}^3 \log q_t(x) \\
&= -q_t^2(x) \sum_{n=1}^N \pi_n q_{t,n}(x) z_{t,n}^i(x) z_{t,n}^j(x) z_{t,n}^k(x) + q_t(x) \sum_{n=1}^N \pi_n q_{t,n}(x) z_{t,n}^k(x) \sum_{n=1}^N \pi_n q_{t,n}(x) z_{t,n}^i(x) z_{t,n}^j(x) \\
&\quad + q_t(x) \sum_{n=1}^N \pi_n q_{t,n}(x) z_{t,n}^j(x) \sum_{n=1}^N \pi_n q_{t,n}(x) z_{t,n}^i(x) z_{t,n}^k(x) \\
&\quad + q_t(x) \sum_{n=1}^N \pi_n q_{t,n}(x) z_{t,n}^i(x) \sum_{n=1}^N \pi_n q_{t,n}(x) z_{t,n}^j(x) z_{t,n}^k(x) \\
&\quad - 2 \left( \sum_n \pi_n q_{t,n}(x) z_{t,n}^i(x) \right) \left( \sum_n \pi_n q_{t,n}(x) z_{t,n}^j(x) \right) \left( \sum_{n=1}^N \pi_n q_{t,n}(x) z_{t,n}^k(x) \right) \\
&\quad + q_t^2(x) \sum_{n=1}^N \pi_n q_{t,n}(x) [\Sigma_{t,n}^{-1}]^{ij} z_{t,n}^k(x) - q_t(x) \sum_{n=1}^N \pi_n q_{t,n}(x) [\Sigma_{t,n}^{-1}]^{ij} \sum_{n=1}^N \pi_n q_{t,n}(x) z_{t,n}^k(x) \\
&\quad + q_t^2(x) \sum_{n=1}^N \pi_n q_{t,n}(x) [\Sigma_{t,n}^{-1}]^{ik} z_{t,n}^j(x) - q_t(x) \sum_{n=1}^N \pi_n q_{t,n}(x) [\Sigma_{t,n}^{-1}]^{ik} \sum_{n=1}^N \pi_n q_{t,n}(x) z_{t,n}^j(x) \\
&\quad + q_t^2(x) \sum_{n=1}^N \pi_n q_{t,n}(x) [\Sigma_{t,n}^{-1}]^{jk} z_{t,n}^i(x) - q_t(x) \sum_{n=1}^N \pi_n q_{t,n}(x) z_{t,n}^i(x) \sum_{n=1}^N \pi_n q_{t,n}(x) [\Sigma_{t,n}^{-1}]^{jk}.
\end{aligned}$$

Below, we write  $\xi_t(x, i) := \max_n |z_{t,n}^i(x)|$  and  $\bar{\Sigma}$  to be a matrix such that  $\bar{\Sigma}^{ij} := \max_n |[\Sigma_{t,n}^{-1}]^{ij}|$ . Also write  $h_{t,n}(x) = \pi_n q_{t,n}(x)/q_t(x)$ . Note that for any  $x$ ,  $\sum_{n=1}^N h_{t,n}(x) = 1$ . Therefore, we take  $\max_n$  within each summation above and get

$$|\partial_{ijk}^3 \log q_t(x)| \leq 6\xi_t(x, i)\xi_t(x, j)\xi_t(x, k) + 2\bar{\Sigma}^{ij}\xi_t(x, k) + 2\bar{\Sigma}^{ik}\xi_t(x, j) + 2\bar{\Sigma}^{jk}\xi_t(x, i).$$

### G.1.3 ASYMPTOTIC EQUIVALENCE OF $\mu_t(x_t)$ AND $x_t$

Intuitively,  $\mu_t(x_t)$  and  $x_t$  are asymptotically close when  $1 - \alpha_t$  is small, which will be useful for later analysis. In this subsection, we will show that  $\xi_{t-1}(\mu_t, i) - \xi_t(x_t, i) = \tilde{O}(1 - \alpha_t)$ .

Note that for each  $n$  and fixed  $x_t$  (writing  $\mu_t(x_t) = \mu_t$ ),

$$\begin{aligned}
& z_{t-1,n}(\mu_t) - z_{t,n}(x_t) \\
&= \Sigma_{t-1,n}^{-1}(\mu_t - \mu_{t-1,n}) - \Sigma_{t,n}^{-1}(x_t - \mu_{t,n}) \\
&= (\Sigma_{t-1,n}^{-1} - \Sigma_{t,n}^{-1})(\mu_t - \mu_{t-1,n}) - \Sigma_{t,n}^{-1}((x_t - \mu_{t,n}) - (\mu_t - \mu_{t-1,n})). \tag{41}
\end{aligned}$$

Here, since  $\Sigma_{t-1,n}$  is real symmetric, we can write the eigen-decomposition as  $\Sigma_{t-1,n} = UDU^\top$ , where  $U$  is an orthonormal matrix (having unit 2-norm) and  $D$  is a diagonal matrix (with all diagonal elements positive). In the same notation,  $\Sigma_{t-1,n}^{-1} = UD^{-1}U^\top$ , and  $\Sigma_{t,n}^{-1} = (\alpha_t \Sigma_{t-1,n} + (1 - \alpha_t)I_d)^{-1} = U(\alpha_t D + (1 - \alpha_t)I_d)^{-1}U^\top$ . Since

$$\begin{aligned}
& |[D^{-1}]^{ii} - [(\alpha_t D + (1 - \alpha_t)I_d)^{-1}]^{ii}| = \left| \frac{1}{D^{ii}} - \frac{1}{\alpha_t D^{ii} + (1 - \alpha_t)} \right| \\
&\leq \frac{(1 - \alpha_t)(|D^{ii}| + 1)}{\alpha_t (D^{ii})^2 + (1 - \alpha_t)D^{ii}} \\
&= \tilde{O}(1 - \alpha_t),
\end{aligned}$$

the following holds:

$$\|\Sigma_{t-1,n}^{-1} - \Sigma_{t,n}^{-1}\| = \tilde{O}(1 - \alpha_t).$$

Denote  $[A]^{i*}$  as the  $i$ -th row of a matrix  $A$ . Thus, following from (41), for any  $i \in [d]$ ,

$$\|[\Sigma_{t-1,n}^{-1}]^{i*} - [\Sigma_{t,n}^{-1}]^{i*}\| \stackrel{(i)}{\leq} \|\Sigma_{t-1,n}^{-1} - \Sigma_{t,n}^{-1}\| = \tilde{O}(1 - \alpha_t), \tag{42}$$



$$\begin{aligned}
2484 \quad |\mu_t^i - x_t^i| &= \left| \frac{1 - \sqrt{\alpha_t}}{\sqrt{\alpha_t}} x_t^i - \frac{1 - \alpha_t}{\sqrt{\alpha_t}} \partial_i \log q_t(x_t) \right| = \tilde{O}(1 - \alpha_t), \\
2485 \quad & \\
2486 \quad |\mu_{t-1,n}^i - \mu_{t-1,n}^i| &= |(1 - \sqrt{\alpha_t}) \mu_{t-1,n}^i| = \tilde{O}(1 - \alpha_t), \\
2487 \quad &
\end{aligned}$$

2488 where (i) follows from the definition of matrix 2-norm and from the fact that  $[\Sigma_{t,n}^{-1}]^{i*} = \Sigma_{t,n}^{-1} \mathbf{1}_i$  ( $\mathbf{1}_i$   
2489 is the unit vector where the  $i$ -th element is 1, and recall that  $\Sigma_{t,n}^{-1}$  is symmetric). This implies that  
2490  $|z_{t-1,n}^i(\mu_t) - z_{t,n}^i(x_t)| = \tilde{O}(1 - \alpha_t), \forall i$ . Thus,

$$\begin{aligned}
2492 \quad \xi_{t-1}(\mu_t, i) - \xi_t(x_t, i) &= \max_n |z_{t-1,n}^i(\mu_t)| - \max_n |z_{t,n}^i(x_t)| \\
2493 \quad &\leq \max_n |z_{t-1,n}^i(\mu_t) - z_{t,n}^i(x_t)| = \tilde{O}(1 - \alpha_t), \quad (43) \\
2494 \quad &
\end{aligned}$$

2495 where the last inequality follows because  $\max_n |a_n| + \max_n |b_n| \geq \max_n (|a_n| + |b_n|) \geq \max_n |a_n + b_n|$ .

2497 Following from Theorem 1, we have

$$\begin{aligned}
2499 \quad \mathbb{E}_{X_t \sim Q_t} &\left[ \sum_{i,j,k=1}^d \partial_{ijk}^3 \log q_{t-1}(\mu_t(X_t)) \partial_{ijk}^3 \log q_t(X_t) \right] \\
2500 \quad & \\
2501 \quad &\leq \mathbb{E}_{X_t \sim Q_t} \left[ \sum_{i,j,k=1}^d \left( 6\xi(\mu_t(X_t), i)\xi(\mu_t(X_t), j)\xi(\mu_t(X_t), k) + 2\bar{\Sigma}^{ij}\xi(\mu_t(X_t), k) + 2\bar{\Sigma}^{ik}\xi(\mu_t(X_t), j) \right. \right. \\
2502 \quad & \\
2503 \quad &\left. \left. + 2\bar{\Sigma}^{jk}\xi(\mu_t(X_t), i) \right) \left( 6\xi(X_t, i)\xi(X_t, j)\xi(X_t, k) + 2\bar{\Sigma}^{ij}\xi(X_t, k) + 2\bar{\Sigma}^{ik}\xi(X_t, j) + 2\bar{\Sigma}^{jk}\xi(X_t, i) \right) \right] \\
2504 \quad & \\
2505 \quad & \\
2506 \quad & \\
2507 \quad & \\
2508 \quad & \\
2509 \quad \stackrel{(ii)}{\lesssim} \mathbb{E}_{X_t \sim Q_t} &\left[ \sum_{i,j,k=1}^d \left( \xi(X_t, i)\xi(X_t, j)\xi(X_t, k) + \bar{\Sigma}^{ij}\xi(X_t, k) + \bar{\Sigma}^{ik}\xi(X_t, j) + \bar{\Sigma}^{jk}\xi(X_t, i) \right)^2 \right] \\
2510 \quad & \\
2511 \quad & \\
2512 \quad &\leq 2\mathbb{E}_{X_t \sim Q_t} \left[ \sum_{i,j,k=1}^d \xi(X_t, i)^2 \xi(X_t, j)^2 \xi(X_t, k)^2 + (\bar{\Sigma}^{ij})^2 \xi(X_t, k)^2 + (\bar{\Sigma}^{ik})^2 \xi(X_t, j)^2 + (\bar{\Sigma}^{jk})^2 \xi(X_t, i)^2 \right] \\
2513 \quad & \\
2514 \quad & \\
2515 \quad & \quad \quad \quad (44)
\end{aligned}$$

2516 where (ii) follows from (43).

#### 2517 G.1.4 EXPLICIT PARAMETER DEPENDENCY

2518 We are now ready for the explicit parameter dependency for Gaussian mixture  $Q_0$ . In the following,  
2519 we provide two different ways to upper-bound the terms in (44) depending on how  $N$  is compared to  
2520  $d$ . The first approach can be applied when  $N < d$ . For the  $\xi(x, \cdot)$  ( $\forall x \in \mathbb{R}^d$ ) terms,

$$\begin{aligned}
2522 \quad \sum_{i=1}^d \xi(x, i)^2 &= \sum_{i=1}^d \max_n ([\Sigma_{t,n}^{-1}]^{i*} (x - \mu_{t,n}))^2 \leq \sum_{i=1}^d \sum_{n=1}^N ([\Sigma_{t,n}^{-1}]^{i*} (x - \mu_{t,n}))^2 \\
2523 \quad & \\
2524 \quad &= \sum_{n=1}^N \|\Sigma_{t,n}^{-1} (x - \mu_{t,n})\|^2 \leq N \max_n \|\Sigma_{t,n}^{-1}\|^2 \max_n \|x - \mu_{t,n}\|^2 \\
2525 \quad & \\
2526 \quad & \\
2527 \quad & \\
2528 \quad &\stackrel{(i)}{\lesssim} N \max_n \|x - \mu_{t,n}\|^2, \\
2529 \quad &
\end{aligned}$$

2530 where (i) follows because of the following. Since  $\Sigma_{t,n}$  is a (full-rank) covariance matrix, all its  
2531 eigenvalues are positive. Let  $\lambda_{n,\min} > 0$  be the smallest eigenvalue of  $\Sigma_{0,n}$ , and thus

$$\begin{aligned}
2532 \quad \max_n \|\Sigma_{t,n}^{-1}\|_2 &\leq \frac{1}{\bar{\alpha}_t \min_n \lambda_{n,\min} + (1 - \bar{\alpha}_t)} \leq \frac{1}{\min\{1, \min_n \lambda_{n,\min}\}} < \infty. \quad (45) \\
2533 \quad & \\
2534 \quad &
\end{aligned}$$

2535 In particular, this bound does not depend on  $d$  or  $T$ . Also, for the  $\bar{\Sigma}$  terms,

$$\begin{aligned}
2536 \quad \sum_{i,j=1}^d (\bar{\Sigma}^{ij})^2 &= \sum_{i,j=1}^d \max_n ([\Sigma_{t,n}^{-1}]^{ij})^2 \leq \sum_{i,j=1}^d \sum_{n=1}^N ([\Sigma_{t,n}^{-1}]^{ij})^2 = \sum_{n=1}^N \|\Sigma_{t,n}^{-1}\|_F^2 \lesssim Nd, \\
2537 \quad &
\end{aligned}$$

where the last inequality follows from (45) and the fact that for any matrix full-rank  $A$ ,  $\|A\|_F \leq \sqrt{d} \|A\|_2$ . The second approach can be applied when  $N \geq d$ , where we can bound the  $\xi(x, \cdot)$  ( $\forall x \in \mathbb{R}^d$ ) terms instead as

$$\begin{aligned} \sum_{i=1}^d \xi(x, i)^2 &= \sum_{i=1}^d \max_n ([\Sigma_{t,n}^{-1}]^{i*} (x - \mu_{t,n}))^2 \\ &\stackrel{(ii)}{\leq} \sum_{i=1}^d \max_n \left( \|[\Sigma_{t,n}^{-1}]^{i*}\|^2 \|x - \mu_{t,n}\|^2 \right) \leq \sum_{i=1}^d \max_n \|[\Sigma_{t,n}^{-1}]^{i*}\|^2 \max_n \|x - \mu_{t,n}\|^2 \\ &\stackrel{(iii)}{\leq} \sum_{i=1}^d \max_n \|\Sigma_{t,n}^{-1}\|^2 \max_n \|x - \mu_{t,n}\|^2 \stackrel{(iv)}{\lesssim} d \max_n \|x - \mu_{t,n}\|^2. \end{aligned}$$

Here (ii) follows from Cauchy-Schwartz inequality, (iii) follows from definition of matrix 2-norm and the fact that  $[\Sigma_{t,n}^{-1}]^{i*} = \Sigma_{t,n}^{-1} \mathbf{1}_i$  ( $\mathbf{1}_i$  is the unit vector where the  $i$ -th element is 1), and (iv) follows from (45). Also, for the second term, we can obtain an alternative upper bound as follows. Write the eigen-decomposition as  $\Sigma_{0,n} = Q_n \text{diag}(\lambda_{n,1}, \dots, \lambda_{n,d}) Q_n^\top$ , where  $Q_n$  here is an orthonormal matrix (that does not depend on  $T$ ). Then,

$$\begin{aligned} \Sigma_{t,n}^{-1} &= Q_n (\bar{\alpha}_t \text{diag}(\lambda_{n,1}, \dots, \lambda_{n,d}) + (1 - \bar{\alpha}_t) I_d)^{-1} Q_n^\top \\ &= Q_n \text{diag}((\bar{\alpha}_t \lambda_{n,1} + (1 - \bar{\alpha}_t))^{-1}, \dots, (\bar{\alpha}_t \lambda_{n,d} + (1 - \bar{\alpha}_t))^{-1}) Q_n^\top, \end{aligned}$$

and thus

$$\begin{aligned} \max_{n \in [N]} |[\Sigma_{t,n}^{-1}]^{ij}| &= \max_{n \in [N]} \left| \sum_{k=1}^d (\bar{\alpha}_t \lambda_{n,k} + (1 - \bar{\alpha}_t))^{-1} Q_n^{ik} Q_n^{kj} \right| \\ &\leq (\min\{1, \min_n \lambda_{n,\min}\})^{-1} \max_{n \in [N], i, j \in [d]} |(Q_n^{i*})^\top (Q_n^{j*})| \\ &\leq (\min\{1, \min_n \lambda_{n,\min}\})^{-1} \max_{n \in [N], i \in [d]} \|Q_n^{i*}\|^2 \\ &= (\min\{1, \min_n \lambda_{n,\min}\})^{-1}, \end{aligned}$$

where the last line follows because  $Q_n$  is orthonormal for all  $n \in [N]$ . Note that this is a uniform bound that does not depend on  $N$ ,  $T$  or  $d$ , which further implies that

$$\sum_{i,j=1}^d (\bar{\Sigma}^{ij})^2 \lesssim d^2.$$

Combining the two cases, we get

$$\sum_{i=1}^d \xi(x, i)^2 \lesssim \min\{d, N\} \max_n \|x - \mu_{t,n}\|^2, \quad (46)$$

$$\sum_{i,j=1}^d (\bar{\Sigma}^{ij})^2 \lesssim d \min\{d, N\}. \quad (47)$$

Therefore, using (46) and (47), we can continue from (44) and get

$$\begin{aligned} \mathbb{E}_{X_t \sim Q_t} \left[ \sum_{i,j,k=1}^d \partial_{ijk}^3 \log q_{t-1}(\mu_t(X_t)) \partial_{ijk}^3 \log q_t(X_t) \right] \\ \lesssim \min\{d, N\}^3 \mathbb{E}_{X_t \sim Q_t} \left[ \|X_t\|^6 + \max_n \|\mu_{t,n}\|^6 \right] + (d \min\{d, N\})(d \min\{d, N\}). \end{aligned}$$

Now, note that

$$\max_n \|\mu_{t,n}\|^6 \leq \max_n \|\mu_{0,n}\|^6 \lesssim d^3$$

since  $\mu_{0,n} < \infty$  is a fixed vector. Also, the expected sixth power of the norm can be bounded as

$$\mathbb{E} \|X_t\|^6 = \mathbb{E} \left[ \left( \|\sqrt{\bar{\alpha}_t} X_0 + \sqrt{1 - \bar{\alpha}_t} \bar{W}_t\|^2 \right)^3 \right] \lesssim \mathbb{E} \|X_0\|^6 + \mathbb{E} \|\bar{W}_t\|^6 \lesssim \mathbb{E} \|X_0\|^6 + d^3,$$

and, when  $Q_0$  is a Gaussian mixture,

$$\int \|x_0\|^6 q_0(x_0) dx_0 = \sum_{n=1}^N \pi_n \int \|x_0\|^6 q_{0,n}(x_0) dx_0 \asymp d^3.$$

Therefore, we finally obtain a bound on the reverse-step error with explicit system parameters:

$$\sum_{t=1}^T \mathbb{E}_{X_{t-1}, X_t \sim Q_{t-1,t}} \left[ \log \frac{q_{t-1|t}(X_{t-1}|X_t)}{p'_{t-1|t}(X_{t-1}|X_t)} \right] \lesssim \frac{d^3 \min\{d, N\}^3 \log^3 T}{T^2}.$$

## G.2 PROOF OF THEOREM 3

Throughout the proof of Theorem 3 we adopt the noise schedule  $\alpha_t$  defined in (10). We first investigate some nice properties of the noise schedule in (10). Since  $c \asymp \log(1/\delta)$ , we have  $1 - \alpha_t \lesssim \log(1/\delta) \log T/T$ . Using a similar argument from (Li et al., 2024c, Equation (39)),

$$\begin{aligned} \frac{1 - \alpha_t}{\alpha_t - \bar{\alpha}_t}, \frac{1 - \alpha_t}{1 - \bar{\alpha}_t}, \frac{1 - \alpha_t}{1 - \bar{\alpha}_{t-1}} &\lesssim \frac{\log(1/\delta) \log T}{T}, \quad \forall 2 \leq t \leq T, \\ \frac{1 - \bar{\alpha}_t}{1 - \bar{\alpha}_{t-1}} - 1 &= \frac{\bar{\alpha}_{t-1}(1 - \alpha_t)}{1 - \bar{\alpha}_{t-1}} \leq \frac{1 - \alpha_t}{1 - \bar{\alpha}_{t-1}} = \tilde{O}\left(\frac{\log T}{T}\right), \quad \forall 2 \leq t \leq T. \end{aligned} \quad (48)$$

We note that Li et al. (2024c) does not highlight  $\delta$  dependency in their results. Also, note that if  $T$  is large,

$$\delta \left(1 + \frac{c \log T}{T}\right)^{\frac{T}{\log T}} \asymp \delta e^c \geq 1.$$

Thus, with any fixed  $r \in (0, 1)$  such that  $t \geq rT$  ( $\geq \frac{T}{\log T}$ ), we have

$$1 - \alpha_t = \frac{c \log T}{T} \min \left\{ \delta \left(1 + \frac{c \log T}{T}\right)^t, 1 \right\} = \frac{c \log T}{T}.$$

As a result,

$$\bar{\alpha}_T \leq \prod_{t=\lceil rT \rceil}^T \alpha_t = \left(1 - \frac{c \log T}{T}\right)^{\lceil(1-r)T\rceil} \asymp \exp \left( \lceil(1-r)T\rceil \left(-\frac{c \log T}{T}\right) \right) = \tilde{O}(T^{-(1-r)c}). \quad (49)$$

Given any  $c > 2$ , we can always find some  $r$  such that  $(1-r)c > 2$ . For example, this is satisfied when  $r = (c-2)/4$  if  $c \in (2, 4)$  and  $r = 1/4$  otherwise. This shows that the  $\alpha_t$  in (10) satisfies  $\bar{\alpha}_T = o(T^{-2})$  if  $c > 2$ . Therefore, the  $\alpha_t$  in (10) satisfies Definition 1.

Since the parameter dependency is clear in the bound for the initialization and estimation errors (Lemmas 3 and 4), it remains to provide a bound on the reverse-step error that depends explicitly on the system parameters, which is the main topic below.

### G.2.1 CHECKING ASSUMPTION 5

Instead of Assumption 4, we check the more general Assumption 5 below. In particular, we verify Assumption 5 with the  $\alpha_t$  in (10). In the following, Lemma 15 is used to establish the first half of Assumption 5. Next, the following Lemma 16 is used to establish the behavior of the expected moments under the perturbed posterior  $Q_{0|t-1}(\cdot|\mu_t(X_t))$  when  $X_t \sim Q_t$ . Both Lemmas 15 and 17 will be useful for establishing the second half of Assumption 5 with the  $\alpha_t$  in (10).

**Lemma 15.** For all  $t \geq 1$ ,  $\ell \geq 1$ , and  $\mathbf{a} \in [d]^p$  such that  $|\mathbf{a}| = p \geq 1$ ,

$$\mathbb{E}_{X_t \sim Q_t} |\partial_{\mathbf{a}}^p \log q_t(X_t)|^\ell \lesssim \frac{d^{p\ell/2}}{(1 - \bar{\alpha}_t)^{p\ell/2}}.$$

2646 *Proof.* See Appendix H.3. □

2647 **Lemma 16.** For all  $t \geq 2$  and  $p \geq 1$ , with the  $\alpha_t$  in (10),

$$2648 \int_{x_0, x_t} \|\mu_t(x_t) - \sqrt{\bar{\alpha}_t} x_0\|^p dQ_{0|t-1}(x_0|\mu_t(x_t))dQ_t(x_t) \lesssim d^{p/2}(1 - \bar{\alpha}_{t-1})^{p/2}.$$

2651 *Proof.* See Appendix H.4. □

2652 Finally, the following Lemma 17 verifies the second half of Assumption 5 with the  $\alpha_t$  defined in (10).

2653 **Lemma 17.** For all  $t \geq 2$ ,  $\ell \geq 1$ , and  $\mathbf{a} \in [d]$  such that  $|\mathbf{a}| = p \geq 1$ , with the  $\alpha_t$  in (10),

$$2654 \mathbb{E}_{X_t \sim Q_t} |\partial_{\mathbf{a}}^p \log q_{t-1}(\mu_t(X_t))|^\ell \lesssim \frac{d^{p\ell/2}}{(1 - \bar{\alpha}_{t-1})^{p\ell/2}}.$$

2655 Combining this with Lemma 15, Assumption 5 holds.

2656 *Proof.* See Appendix H.5. □

2657 Now, Assumption 5 is satisfied since  $\frac{1}{1 - \bar{\alpha}_t} \leq \frac{1}{1 - \bar{\alpha}_1} = \delta^{-1}$  for all  $t \geq 1$  if  $\delta$  is constant. Thus, if  $\delta$  is a constant, Assumption 4 is already satisfied, as is Assumption 5. When  $\delta = 1/\text{poly}(T)$  is vanishing with  $T$ , from (48), we still get  $\frac{1 - \alpha_t}{1 - \bar{\alpha}_{t-1}} = \tilde{O}(1 - \alpha_t)$ . Thus, Assumption 5 is satisfied.

### 2660 G.2.2 EXPRESSING $\partial_{i_j k}^3 \log q_t$

2661 We begin by investigating  $\nabla^2 \log q_t$  ( $t \geq 2$ ), for which we can derive the Hessian of  $\log q_t(x)$  as

$$2662 \begin{aligned} 2663 \nabla^2 \log q_t(x) &= \frac{\partial}{\partial x} \left( \frac{\int_{x_0 \in \mathbb{R}^d} \nabla q_{t|0}(x|x_0) dQ_0(x_0)}{\int_{x_0 \in \mathbb{R}^d} q_{t|0}(x|x_0) dQ_0(x_0)} \right) \\ 2664 &= \frac{q_t(x) \int_{x_0 \in \mathbb{R}^d} \nabla^2 q_{t|0}(x|x_0) dQ_0(x_0) - \left( \int_{x_0 \in \mathbb{R}^d} \nabla q_{t|0}(x|x_0) dQ_0(x_0) \right) \left( \int_{x_0 \in \mathbb{R}^d} \nabla q_{t|0}(x|x_0) dQ_0(x_0) \right)^\top}{q_t^2(x)} \\ 2665 &= \frac{1}{(1 - \bar{\alpha}_t)^2 q_t^2(x)} \left( q_t(x) \int_{x_0 \in \mathbb{R}^d} q_{t|0}(x|x_0) \left( (x - \sqrt{\bar{\alpha}_t} x_0)(x - \sqrt{\bar{\alpha}_t} x_0)^\top - (1 - \bar{\alpha}_t) I_d \right) dQ_0(x_0) \right. \\ 2666 &\quad \left. - \left( \int_{x_0 \in \mathbb{R}^d} q_{t|0}(x|x_0)(x - \sqrt{\bar{\alpha}_t} x_0) dQ_0(x_0) \right) \left( \int_{x_0 \in \mathbb{R}^d} q_{t|0}(x|x_0)(x - \sqrt{\bar{\alpha}_t} x_0) dQ_0(x_0) \right)^\top \right) \\ 2667 &= -\frac{1}{1 - \bar{\alpha}_t} I_d + \frac{1}{(1 - \bar{\alpha}_t)^2} \left( \mathbb{E}_{X_0 \sim Q_{0|t}(\cdot|x)} \left[ (x - \sqrt{\bar{\alpha}_t} X_0)(x - \sqrt{\bar{\alpha}_t} X_0)^\top \right] \right. \\ 2668 &\quad \left. - \left( \mathbb{E}_{X_0 \sim Q_{0|t}(\cdot|x)} [x - \sqrt{\bar{\alpha}_t} X_0] \right) \left( \mathbb{E}_{X_0 \sim Q_{0|t}(\cdot|x)} [x - \sqrt{\bar{\alpha}_t} X_0] \right)^\top \right). \end{aligned} \quad (50)$$

2669 For the third-order partial derivatives, we employ the notation

$$2670 z := \frac{x - \sqrt{\bar{\alpha}_t} x_0}{1 - \bar{\alpha}_t}.$$

2671 Note that  $\partial_k q_{t|0}(x|x_0) = q_{t|0}(x|x_0)(-z^k)$ . Then, we can write (50) as

$$2672 \begin{aligned} 2673 \partial_{ij}^2 \log q_t(x) &= \frac{1}{q_t^2(x)} \left( q_t(x) \underbrace{\int q_{t|0}(x|x_0) z^i z^j dQ_0(x_0)}_{\text{N1}} \right. \\ 2674 &\quad \left. - \underbrace{\int q_{t|0}(x|x_0) z^i dQ_0(x_0) \int q_{t|0}(x|x_0) z^j dQ_0(x_0)}_{\text{N2}} \right) - \frac{1}{1 - \bar{\alpha}_t} I_d. \end{aligned}$$

2675 Note that the last term is a constant. The derivative for term N1 is given by

$$2676 \partial_k \int q_{t|0}(x|x_0) z^i z^j dQ_0(x_0)$$

$$\begin{aligned}
&= \int q_{t|0}(x|x_0)(-z^k)z^i z^j + \mathbf{1}(k=i)q_{t|0}(x|x_0)(1-\bar{\alpha}_t)^{-1}z^j \\
&\quad + \mathbf{1}(k=j)q_{t|0}(x|x_0)(1-\bar{\alpha}_t)^{-1}z^i dQ_0(x_0),
\end{aligned}$$

and the derivative for term N2 is given by

$$\begin{aligned}
&\partial_k \left( \int q_{t|0}(x|x_0)z^i dQ_0(x_0) \int q_{t|0}(x|x_0)z^j dQ_0(x_0) \right) \\
&= \int q_{t|0}(x|x_0) \left( (-z^k)z^i + \mathbf{1}(k=i)(1-\bar{\alpha}_t)^{-1} \right) dQ_0(x_0) \int q_{t|0}(x|x_0)z^j dQ_0(x_0) \\
&\quad + \int q_{t|0}(x|x_0)z^i dQ_0(x_0) \int q_{t|0}(x|x_0) \left( (-z^k)z^j + \mathbf{1}(k=j)(1-\bar{\alpha}_t)^{-1} \right) dQ_0(x_0) \\
&= \left( \int q_{t|0}(x|x_0)(-z^k)z^i dQ_0(x_0) + \mathbf{1}(k=i)(1-\bar{\alpha}_t)^{-1}q_t(x) \right) \int q_{t|0}(x|x_0)z^j dQ_0(x_0) \\
&\quad + \int q_{t|0}(x|x_0)z^i dQ_0(x_0) \left( \int q_{t|0}(x|x_0)(-z^k)z^j dQ_0(x_0) + \mathbf{1}(k=j)(1-\bar{\alpha}_t)^{-1}q_t(x) \right).
\end{aligned}$$

Combining these, the derivative for the numerator is given by

$$\begin{aligned}
&\partial_k(q_t(x)\text{N1} - \text{N2}) = \partial_k(q_t(x))\text{N1} + q_t(x)\partial_k(\text{N1}) - \partial_k(\text{N2}) \\
&= -q_t(x) \int q_{t|0}(x|x_0)z^i z^j z^k dQ_0(x_0) \\
&\quad - \int q_{t|0}(x|x_0)z^k dQ_0(x_0) \int q_{t|0}(x|x_0)z^i z^j dQ_0(x_0) \\
&\quad + \int q_{t|0}(x|x_0)z^j dQ_0(x_0) \int q_{t|0}(x|x_0)z^i z^k dQ_0(x_0) \\
&\quad + \int q_{t|0}(x|x_0)z^i dQ_0(x_0) \int q_{t|0}(x|x_0)z^j z^k dQ_0(x_0).
\end{aligned}$$

Thus,

$$\begin{aligned}
&\partial_{ijk}^3 \log q_t(x) = \partial_k \frac{q_t(x)\text{N1} - \text{N2}}{q_t^2(x)} \\
&= \frac{1}{q_t^3(x)} \left( \partial_k(q_t(x)\text{N1} - \text{N2})q_t(x) + 2(q_t(x)\text{N1} - \text{N2}) \int q_{t|0}(x|x_0)z^k dQ_0(x_0) \right) \\
&= \frac{1}{q_t^3(x)} \left( -q_t^2(x) \int q_{t|0}(x|x_0)z^i z^j z^k dQ_0(x_0) \right. \\
&\quad + q_t(x) \sum_{\substack{a_1=i,j,k \\ a_2 < a_3, a_2, a_3 \neq a_1}} \int q_{t|0}(x|x_0)z^{a_1} dQ_0(x_0) \int q_{t|0}(x|x_0)z^{a_2} z^{a_3} dQ_0(x_0) \\
&\quad \left. - 2 \int q_{t|0}(x|x_0)z^i dQ_0(x_0) \int q_{t|0}(x|x_0)z^j dQ_0(x_0) \int q_{t|0}(x|x_0)z^k dQ_0(x_0) \right) \\
&= - \int z^i z^j z^k dQ_{0|t}(x_0|x) \\
&\quad + \sum_{\substack{a_1=i,j,k \\ a_2 < a_3, a_2, a_3 \neq a_1}} \int z^{a_1} dQ_{0|t}(x_0|x) \int z^{a_2} z^{a_3} dQ_{0|t}(x_0|x) \\
&\quad - 2 \int z^i dQ_{0|t}(x_0|x) \int z^j dQ_{0|t}(x_0|x) \int z^k dQ_{0|t}(x_0|x)
\end{aligned} \tag{51}$$

### G.2.3 EXPLICIT PARAMETER DEPENDENCY

By Cauchy-Schwartz inequality, we have

$$\mathbb{E}_{X_t \sim Q_t} \left[ \sum_{i,j,k=1}^d \partial_{ijk}^3 \log q_{t-1}(\mu_t(X_t)) \partial_{ijk}^3 \log q_t(X_t) \right]$$

$$\leq \sqrt{\mathbb{E}_{X_t \sim Q_t} \left[ \sum_{i,j,k=1}^d \left( \partial_{ijk}^3 \log q_{t-1}(\mu_t(X_t)) \right)^2 \right]} \times \sqrt{\mathbb{E}_{X_t \sim Q_t} \left[ \sum_{i,j,k=1}^d \left( \partial_{ijk}^3 \log q_t(X_t) \right)^2 \right]}.$$
(52)

We now analyze the two terms in (52) separately.

We begin with the second term in (52). Recall that  $Z = \frac{X_t - \sqrt{\bar{\alpha}_t} X_0}{1 - \bar{\alpha}_t}$  is standard Gaussian under  $Q_{0,t}$ . Also note that for a standard Gaussian random variable  $Z$ ,  $\mathbb{E} \|Z\|^6 = d(d+2)(d+4) \lesssim d^3$ . Now, substituting (51) into the second term of (52), we get

$$\begin{aligned} & \sum_{i,j,k=1}^d \mathbb{E}_{X_t \sim Q_t} \left( \int z^i z^j z^k dQ_{0|t}(x_0|X_t) \right)^2 \\ & \leq \frac{1}{(1 - \bar{\alpha}_t)^3} \mathbb{E}_{X_0, X_t \sim Q_{0,t}} \left[ \sum_{i,j,k=1}^d \left( \frac{X_t^i - \sqrt{\bar{\alpha}_t} X_0^i}{\sqrt{1 - \bar{\alpha}_t}} \right)^2 \left( \frac{X_t^j - \sqrt{\bar{\alpha}_t} X_0^j}{\sqrt{1 - \bar{\alpha}_t}} \right)^2 \left( \frac{X_t^k - \sqrt{\bar{\alpha}_t} X_0^k}{\sqrt{1 - \bar{\alpha}_t}} \right)^2 \right] \\ & = \frac{1}{(1 - \bar{\alpha}_t)^3} \mathbb{E}_{X_0, X_t \sim Q_{0,t}} \left\| \frac{X_t - \sqrt{\bar{\alpha}_t} X_0}{\sqrt{1 - \bar{\alpha}_t}} \right\|^6 \\ & = \frac{1}{(1 - \bar{\alpha}_t)^3} \mathbb{E} \|Z\|^6 \\ & \lesssim \frac{d^3}{(1 - \bar{\alpha}_t)^3}, \end{aligned}$$

and

$$\begin{aligned} & \sum_{i,j,k=1}^d \mathbb{E}_{X_t \sim Q_t} \left( \int z^i dQ_{0|t}(x_0|x) \int z^j z^k dQ_{0|t}(x_0|x) \right)^2 \\ & = \mathbb{E}_{X_t \sim Q_t} \left[ \left\| \int z dQ_{0|t}(x_0|x) \right\|^2 \sum_{j,k=1}^d \left( \int z^j z^k dQ_{0|t}(x_0|x) \right)^2 \right] \\ & \leq \left( \mathbb{E}_{X_t \sim Q_t} \left\| \int z dQ_{0|t}(x_0|x) \right\|^6 \right)^{1/3} \left( \mathbb{E}_{X_t \sim Q_t} \left( \sum_{j,k=1}^d \left( \int z^j z^k dQ_{0|t}(x_0|x) \right)^2 \right)^{3/2} \right)^{2/3} \\ & \leq \mathbb{E}_{X_0, X_t \sim Q_{0,t}} \left\| \frac{X_t - \sqrt{\bar{\alpha}_t} X_0}{1 - \bar{\alpha}_t} \right\|^6 \\ & = \frac{1}{(1 - \bar{\alpha}_t)^3} \mathbb{E} \|Z\|^6 \\ & \lesssim \frac{d^3}{(1 - \bar{\alpha}_t)^3}, \end{aligned}$$

and

$$\begin{aligned} & \sum_{i,j,k=1}^d \mathbb{E}_{X_t \sim Q_t} \left( \int z^i dQ_{0|t}(x_0|X_t) \int z^j dQ_{0|t}(x_0|X_t) \int z^k dQ_{0|t}(x_0|X_t) \right)^2 \\ & = \mathbb{E}_{X_t \sim Q_t} \left( \sum_{i=1}^d \left( \int \frac{X_t^i - \sqrt{\bar{\alpha}_t} x_0^i}{1 - \bar{\alpha}_t} dQ_{0|t}(x_0|X_t) \right)^2 \right)^3 \\ & = \frac{1}{(1 - \bar{\alpha}_t)^3} \mathbb{E}_{X_t \sim Q_t} \left\| \int \frac{X_t - \sqrt{\bar{\alpha}_t} x_0}{\sqrt{1 - \bar{\alpha}_t}} dQ_{0|t}(x_0|X_t) \right\|^6 \\ & \leq \frac{1}{(1 - \bar{\alpha}_t)^3} \mathbb{E} \|Z\|^6 \end{aligned}$$

$$\lesssim \frac{d^3}{(1 - \bar{\alpha}_t)^3}.$$

Thus, the second term of (52) satisfies that

$$\mathbb{E}_{X_t \sim Q_t} \left[ \sum_{i,j,k=1}^d \left( \partial_{ijk}^3 \log q_t(X_t) \right)^2 \right] \lesssim \frac{d^3}{(1 - \bar{\alpha}_t)^3}.$$

Now we turn to the first term in (52). Note that  $Z = \frac{\mu_t(X_t) - \sqrt{\bar{\alpha}_{t-1}}X_0}{1 - \bar{\alpha}_{t-1}}$ . While  $Z$  is no longer standard Gaussian under  $Q_{0,t}$ , we can still achieve moment bounds using Lemma 16. Now, substituting (51) into the first term of (52), we apply Lemma 16 and get

$$\begin{aligned} & \sum_{i,j,k=1}^d \mathbb{E}_{X_t \sim Q_t} \left( \int z^i z^j z^k dQ_{0|t-1}(x_0 | \mu_t(X_t)) \right)^2 \\ & \leq \frac{1}{(1 - \bar{\alpha}_{t-1})^3} \mathbb{E}_{\substack{X_0 \sim Q_{0|t-1}(\cdot | \mu_t(X_t)) \\ X_t \sim Q_t}} \left\| \frac{\mu_t(X_t) - \sqrt{\bar{\alpha}_{t-1}}X_0}{\sqrt{1 - \bar{\alpha}_{t-1}}} \right\|^6 \lesssim \frac{d^3}{(1 - \bar{\alpha}_{t-1})^3}, \end{aligned}$$

and similarly,

$$\begin{aligned} & \sum_{i,j,k=1}^d \mathbb{E}_{X_t \sim Q_t} \left( \int z^i dQ_{0|t-1}(x_0 | \mu_t(X_t)) \int z^j z^k dQ_{0|t-1}(x_0 | \mu_t(X_t)) \right)^2 \\ & \lesssim \frac{d^3}{(1 - \bar{\alpha}_{t-1})^3}, \\ & \sum_{i,j,k=1}^d \mathbb{E}_{X_t \sim Q_t} \left( \int z^i dQ_{0|t-1}(x_0 | \mu_t(X_t)) \int z^j dQ_{0|t-1}(x_0 | \mu_t(X_t)) \int z^k dQ_{0|t-1}(x_0 | \mu_t(X_t)) \right)^2 \\ & \lesssim \frac{d^3}{(1 - \bar{\alpha}_{t-1})^3}. \end{aligned}$$

Thus, the first term of (52) satisfies that

$$\mathbb{E}_{X_t \sim Q_t} \left[ \sum_{i,j,k=1}^d \left( \partial_{ijk}^3 \log q_{t-1}(\mu_t(X_t)) \right)^2 \right] \lesssim \frac{d^3}{(1 - \bar{\alpha}_{t-1})^3}.$$

Finally, since  $\frac{1 - \alpha_t}{1 - \bar{\alpha}_t} \frac{1 - \alpha_t}{1 - \bar{\alpha}_{t-1}} \lesssim \frac{\log(1/\delta) \log T}{T}$ , we arrive at

$$(1 - \alpha_t)^3 \mathbb{E}_{X_t \sim Q_t} \left[ \sum_{i,j,k=1}^d \partial_{ijk}^3 \log q_{t-1}(\mu_t(X_t)) \partial_{ijk}^3 \log q_t(X_t) \right] \lesssim \frac{d^3 \log^3(1/\delta) \log^3 T}{T^3}.$$

Summation over  $t \geq 2$  gives us the desirable result.

### G.3 THEOREM 5 AND ITS PROOF

Before we enter the proof of Theorem 4, we introduce an intermediate result which might have independent interest. Previously, for regular samplers, linear dimensional dependency can be shown when all  $Q_t$ 's ( $\forall t \geq 0$ ) have Lipschitz score (Chen et al., 2023a;d). The following Theorem 5 provides an accelerated convergence guarantee when all  $Q_t$ 's ( $\forall t \geq 0$ ) have Lipschitz Hessians.

**Theorem 5** (Accelerated Sampler for All-Path Lipschitz Hessians). *Suppose that  $\nabla^2 \log q_t(x)$ ,  $\forall t \geq 0$  is 2-norm  $M$ -Lipschitz, i.e.,  $\exists M > 0$  such that*

$$\|\nabla^2 \log q_t(x) - \nabla^2 \log q_t(y)\| \leq M \|x - y\| \quad (53)$$

for all  $x, y \in \mathbb{R}^d$  and  $t \geq 0$ . Then, under Assumptions 1, 3 and 4, if the  $\alpha_t$  satisfies Definition 1, the distribution  $\hat{P}'_0$  from the accelerated sampler satisfies

$$\text{KL}(Q_0 \| \hat{P}'_0) \lesssim \frac{d^2 M^2 \log^3 T}{T^2} + (\log T) \varepsilon^2 + \frac{\log^2 T}{T} \varepsilon_H^2.$$

### 2862 G.3.1 PROOF OF THEOREM 5

2863 In order to continue from Theorem 1 (in particular, the reverse-step error in (26)), we need to introduce  
 2864 some useful notations for the distribution class in (53). For a matrix  $A$ , define its vectorization as  
 2865  $\text{vec}(A) := [A^{11}, \dots, A^{1d}, \dots, A^{d1}, \dots, A^{dd}]^\top \in \mathbb{R}^{d^2}$ . Define  $K_t \in \mathbb{R}^{d^2 \times d}$  to be the matrix that  
 2866 reorganizes the third-order partial derivative tensor, i.e.,  
 2867

$$2868 [K_t(x)]^{mk} := \partial_{ijk}^3 \log q_t(x), \text{ s.t. } m = (i-1)d + j, \forall i, j, k \in [d].$$

2869 With these notations, consider  $y = x + \xi u$  where  $u \in \mathbb{R}^d$  satisfies  $\|u\|^2 = 1$  and  $\xi \in \mathbb{R}$  is some small  
 2870 constant. Then,  
 2871

$$2872 \text{vec}(\nabla^2 \log q_t(y)) - \text{vec}(\nabla^2 \log q_t(x)) = K_t(x^*)(y - x) = \xi K_t(x^*)u.$$

2873 Here  $x^* = \gamma x + (1 - \gamma)y$  for some  $\gamma \in (0, 1)$ . Also, we have  
 2874

$$\begin{aligned} 2875 & \|\text{vec}(\nabla^2 \log q_t(y)) - \text{vec}(\nabla^2 \log q_t(x))\| \\ 2876 &= \|\nabla^2 \log q_t(y) - \nabla^2 \log q_t(x)\|_F \\ 2877 &\leq \sqrt{d} \|\nabla^2 \log q_t(y) - \nabla^2 \log q_t(x)\| \leq \sqrt{d}M \|y - x\| \end{aligned}$$

2878 where the last inequality comes from (53). Thus, noting that  $y = x + \xi u$  and that  $\|u\|^2 = 1$ , we take  
 2880 the limit of  $\xi$  to 0 and get  
 2881

$$2882 \|K_t(x)\| \leq \sqrt{d}M, \quad \forall x \in \mathbb{R}^d, \forall t \geq 0. \quad (54)$$

2884 We now derive an explicit upper bound on the reverse-step error. Using Cauchy-Schwartz inequality,  
 2885 for any  $t \geq 1$  and  $x_t \in \mathbb{R}^d$ , we have  
 2886

$$\begin{aligned} 2887 & \sum_{i,j,k=1}^d \partial_{ijk}^3 \log q_{t-1}(\mu_t) \partial_{ijk}^3 \log q_t(x_t) \\ 2888 &\leq \sqrt{\sum_{i,j,k=1}^d (\partial_{ijk}^3 \log q_{t-1}(\mu_t))^2} \sqrt{\sum_{i,j,k=1}^d (\partial_{ijk}^3 \log q_t(x_t))^2} \\ 2889 &= \|K_{t-1}(\mu_t)\|_F \times \|K_t(x_t)\|_F \\ 2890 &\leq (\sqrt{d} \|K_{t-1}(\mu_t)\|) \times (\sqrt{d} \|K_t(x_t)\|) \\ 2891 &\leq d^2 M^2. \end{aligned} \quad (55)$$

2892 Therefore, following from Theorem 1, we obtain  
 2893

$$2894 \sum_{t=1}^T \mathbb{E}_{X_{t-1}, X_t \sim Q_{t-1,t}} \left[ \log \frac{q_{t-1|t}(X_{t-1}|X_t)}{p_{t-1|t}(X_{t-1}|X_t)} \right] \lesssim \frac{d^2 M^2 \log^3 T}{T^2}.$$

### 2902 G.4 PROOF OF THEOREM 4

2903 Throughout the proof of Theorem 4 we adopt the noise schedule  $\alpha_t$  defined in (10) with  $\delta =$   
 2904  $1/(M^{\frac{2}{3}} T^{\frac{3}{2}})$  and  $c \geq \log(M^{\frac{2}{3}} T^{\frac{3}{2}})$ . Note that such  $\alpha_t$  satisfies Definition 1 for all  $t \geq 1$ , and thus  
 2905 the bound on the estimation error still applies. Also, Assumption 5 is satisfied for  $t \geq 2$ , as shown  
 2906 in Appendix G.2.1. Thus, Theorem 3 can be applied and the reverse-step error at  $t \geq 2$  satisfies,  
 2907  $\forall t = T, \dots, 2$ ,  
 2908

$$\begin{aligned} 2909 & (1 - \alpha_t)^3 \mathbb{E}_{X_t \sim Q_t} \left[ \sum_{i,j,k=1}^d \partial_{ijk}^3 \log q_{t-1}(\mu_t(X_t)) \partial_{ijk}^3 \log q_t(X_t) \right] \\ 2910 & \lesssim \frac{d^3 (\log^3 M + \log^3 T) \log^3 T}{T^3}. \end{aligned} \quad (56)$$

2911 In order to determine the dimensional dependency of the reverse-step error, the key is thus to establish  
 2912 a similar upper bound at  $t = 1$ .  
 2913  
 2914  
 2915



Now, we provide a modified version of Theorem 1 which does not require  $q_0$  to be analytic (as in Assumption 2) or to have regular partial derivatives (as in Assumption 5). We recall from (21) that the reverse-step error at time  $t = 1$  can be upper-bounded as

$$\mathbb{E}_{X_0 \sim Q_{0|1}} \left[ \log \frac{q_{0|1}(X_0|x_1)}{p'_{0|1}(X_0|x_1)} \right] \leq \mathbb{E}_{X_0 \sim Q_{0|1}} [\zeta'_{1,0}] - \mathbb{E}_{X_0 \sim P'_{0|1}} [\zeta'_{1,0}].$$

Instead of the Taylor expansion in (20), we employ the following different expansion from Taylor's theorem. The only difference is that the expansion stops at the third-order term.

$$\begin{aligned} \zeta'_{1,0} &= (\nabla \log q_0(\mu_1) - \sqrt{\alpha_0} \nabla \log q_1(x_1))^\top (x_0 - \mu_1) \\ &\quad + \frac{1}{2} (x_0 - \mu_1)^\top \left( \nabla^2 \log q_0(\mu_1) - \frac{\alpha_0}{1 - \alpha_0} B_t \right) (x_0 - \mu_1) \\ &\quad + \frac{1}{3!} \sum_{i,j,k=1}^d \partial_{ijk}^3 \log q_0(\mu_1^*) (x_0^i - \mu_1^i) (x_0^j - \mu_1^j) (x_0^k - \mu_1^k). \end{aligned} \quad (57)$$

Here  $\mu_1^*(x_1, x_0) := \varsigma \mu_1(x_1) + (1 - \varsigma) x_0$  for some  $\varsigma \in [0, 1]$ . Note that  $\mu_1^*$  is a function of both  $x_1$  and  $x_0$ .

A remarkable difference from the proof of Theorem 1 is that we do not require  $q_0$  to be analytic for this expansion. Indeed, it only requires that the third-order partial derivative exists. With this new expansion, we have the following lemma, which serves as a counterpart of Lemma 11.

**Lemma 18.** *Suppose that  $q_0$  exists and  $\nabla^2 \log q_0$  is 2-norm  $M$ -Lipschitz. Then, with the  $\alpha_t$  in (10), we have*

$$\mathbb{E}_{X_0 \sim Q_0} \left( \mathbb{E}_{X_0 \sim Q_{0|1}} - \mathbb{E}_{X_0 \sim P'_{0|1}} \right) [\zeta'_{1,0}] \lesssim \frac{(1 - \alpha_1)^{3/2}}{3! \alpha_1^{3/2}} d^4 M.$$

*Proof.* See Appendix H.6. □

Finally, with the chosen  $\delta = 1 - \alpha_1 = 1/(M^{\frac{2}{3}} T^{\frac{3}{2}})$ , the rate at the first step satisfies

$$\frac{(1 - \alpha_1)^{3/2}}{3! \alpha_1^{3/2}} d^4 M \lesssim \frac{d^4}{T^{9/4}} = o(T^{-2}).$$

As  $T$  becomes large, the rate of the total reverse-step error, which decays as  $\tilde{O}(T^{-2})$ , is not affected. The proof is now complete.

## H AUXILIARY PROOFS OF THEOREMS 2 TO 4

In this section, we provide the proofs for the lemmas in the proofs for Theorems 2 to 4.

### H.1 PROOF OF LEMMA 13

Fix  $k \geq 1$  and  $\mathbf{a} \in [d]^k$ . Recall that  $u \leq \det(\Sigma_z) \leq U$ ,  $\|\Sigma_z^{-1}\| \leq V$ , and  $\sup_{z \in \mathcal{Z}, i, j \in [d]^2} |[\Sigma_z^{-\frac{1}{2}}]^{ij}| \leq w$  for all  $z \in \mathcal{Z}$ . Also write  $\phi(y)$  as the p.d.f. of the unit Gaussian. We are interested in upper-bounding the absolute partial derivatives of  $\log q(x)$  with a function of  $x$  where

$$q(x) = \int g(x|z) d\Pi(z),$$

where, using the change-of-variable formula,

$$g(x|z) = \frac{1}{\det(\Sigma_z)^{\frac{1}{2}}} \phi \left( \Sigma_z^{-\frac{1}{2}} (x - \mu_z) \right). \quad (58)$$

We first identify an upper bound on the absolute partial derivatives of  $q(x)$ . Now,

$$\partial_{\mathbf{a}}^k q(x) \stackrel{(i)}{=} \int \partial_{\mathbf{a}}^k g(x|z) d\Pi(z)$$

2970  
2971  
2972

$$\leq \stackrel{(ii)}{\leq} \frac{1}{\inf_{z \in \mathcal{Z}} \det(\Sigma_z)^{\frac{1}{2}}} \int \partial_{\mathbf{a}}^k \phi \left( \Sigma_z^{-\frac{1}{2}} (x - \mu_z) \right) d\Pi(z)$$

2973  
2974  
2975  
2976  
2977  
2978

where (i) follows from the dominated convergence theorem (see (31)), and (ii) follows from (58). To obtain an upper bound on the  $k$ -th derivative of Gaussian density, we invoke the multivariate version of the Faà di Bruno's formula (Constantine & Savits, 1996, Theorem 2.1). Since  $y = \Sigma_z^{-\frac{1}{2}} (x - \mu_z)$  is linear in  $x$ , only the first-order partial derivative is non-zero and is equal to an entry in  $\Sigma_z^{-\frac{1}{2}}$ . Thus, we have

2979  
2980  
2981  
2982  
2983  
2984

$$\begin{aligned} \left| \partial_{\mathbf{a}}^k \phi \left( \Sigma_z^{-\frac{1}{2}} (x - \mu_z) \right) \right| &= \left| \sum_{\mathbf{a}' \in [d]^k} \phi_{\mathbf{a}'}^{(k)}(y) \prod_{s=1}^k \frac{\partial}{\partial x_{a_s}} [\Sigma_z^{-\frac{1}{2}} (x - \mu_z)]^{a'_s} \right| \\ &\leq \left| \sum_{\mathbf{a}' \in [d]^k} \phi_{\mathbf{a}'}^{(k)} \left( \Sigma_z^{-\frac{1}{2}} (x - \mu_z) \right) \right| \max\{w, 1\}^k, \forall \mathbf{a} : |\mathbf{a}| = k. \end{aligned}$$

2985  
2986  
2987  
2988  
2989

Here we define  $\phi_{\mathbf{a}}^{(k)}(y) := \partial_{\mathbf{a}}^k \phi(y)$ . Since  $\phi(y)$  is a Gaussian density which is infinitely differentiable and decays exponentially at the tail, its  $k$ -th order derivative satisfies  $\phi_{\mathbf{a}}^{(k)}(y) = \text{poly}_k(y) \phi(y)$  where  $\text{poly}_k(y)$  is a  $k$ -th order polynomial function in  $y_1, \dots, y_d$  (and thus in  $x_1, \dots, x_d$  by linearity). Also note that, for any  $\mathbf{a} \in [d]^k$ ,

2990  
2991

$$\lim_{\|y\| \rightarrow \infty} \left| \phi_{\mathbf{a}}^{(k)}(y) \right| = \lim_{\|y\| \rightarrow \infty} |\text{poly}_k(y) \phi(y)| = 0.$$

2992  
2993  
2994

By the continuity of  $\phi_{\mathbf{a}}^{(k)}(y)$ , there exists  $\bar{y}_{\mathbf{a}}$  such that  $\left| \phi_{\mathbf{a}}^{(k)}(y) \right| \leq \left| \phi_{\mathbf{a}}^{(k)}(\bar{y}_{\mathbf{a}}) \right| \leq \text{poly}_k(\bar{y}_{\mathbf{a}})$  for all  $y \in \mathbb{R}^d$ . Now, for all  $x \in \mathbb{R}^d$ ,

2995  
2996

$$\begin{aligned} \left| \partial_{\mathbf{a}}^k q(x) \right| &\leq \int \det(\Sigma_z)^{-\frac{1}{2}} \left| \partial_{\mathbf{a}}^k \phi \left( \Sigma_z^{-\frac{1}{2}} (x - \mu_z) \right) \right| d\Pi(z) \\ &\leq \max\{w, 1\}^k \int \det(\Sigma_z)^{-\frac{1}{2}} \left( \sum_{\mathbf{a} \in [d]^k} \left| \text{poly}_k \left( \Sigma_z^{-\frac{1}{2}} (x - \mu_z) \right) \right| \right) \phi \left( \Sigma_z^{-\frac{1}{2}} (x - \mu_z) \right) d\Pi(z) \end{aligned} \quad (59)$$

3000  
3001  
3002

$$\leq \frac{d^k \max\{w, 1\}^k}{\sqrt{u}} |\text{poly}_k(\bar{y}_{\mathbf{a}})| \phi(\bar{y}_{\mathbf{a}}). \quad (60)$$

3003  
3004

We have thus obtained a constant upper bound on all partial derivatives of  $q(x)$  of order  $k$ .

3005  
3006

Next, we convert the partial derivative bound into that for  $\log q(x)$ . We again invoke Faà di Bruno's formula Constantine & Savits (1996). Note that

3007  
3008  
3009

$$\partial_{\mathbf{a}}^k \log q(x) = q(x)^{-k} \sum_{\mathbf{b}_1, \dots, \mathbf{b}_k} \prod_{j=1}^k \partial_{\mathbf{b}_j}^{|\mathbf{b}_j|} q(x) =: \sum_{\mathbf{b}_1, \dots, \mathbf{b}_k} r_{\mathbf{b}_1, \dots, \mathbf{b}_k}(x) \quad (61)$$

3010  
3011  
3012  
3013  
3014  
3015  
3016

in which we define each summation term as  $r$ . Here  $\{\mathbf{b}_1, \dots, \mathbf{b}_k\}$  is some (possibly empty) partition of  $\mathbf{a}$ , i.e.,  $\sum_j \mathbf{b}_j = \mathbf{a}$  and  $\sum_j |\mathbf{b}_j| = k$  (thus, at most  $k$  partitions). We order this partition such that  $k \geq |\mathbf{b}_1| \geq \dots \geq |\mathbf{b}_k| \geq 0$ . Note that the total number of partition can be upper-bounded by  $d^k \sum_{l=1}^k B_{k,l}(1, \dots, 1) = d^k B_k$ , where  $B_{k,l}(\cdot)$  and  $B_k$  are the Bell polynomials and the Bell number, respectively.

3017  
3018

We first showcase a simple yet useful upper bound. From (60), we get,

3019  
3020  
3021  
3022  
3023

$$\begin{aligned} \left| \prod_{j=1}^k \partial_{\mathbf{b}_j}^{|\mathbf{b}_j|} q(x) \right| &\leq \prod_{j=1}^k \left| \partial_{\mathbf{b}_j}^{|\mathbf{b}_j|} q(x) \right| \\ &\leq \frac{(d \max\{w, 1\})^{\sum_j |\mathbf{b}_j|}}{\min\{u, 1\}^{k/2}} \max_y \{\max \phi(y), 1\}^k \prod_{j=1}^k \left| \text{poly}_{|\mathbf{b}_j|}(\bar{y}_{\mathbf{b}_j}) \right| \end{aligned}$$

$$\begin{aligned}
&\leq \frac{(d \max\{w, 1\})^{\sum_j |\mathbf{b}_j|}}{\min\{u, 1\}^{k/2}} \max\{\max_y \phi(y), 1\}^k \max_j \left| \text{poly}_{|\mathbf{b}_j|}(\bar{y}_{\mathbf{b}_j}) \right|^k \\
&\leq C_{\mathbf{b}_1, \dots, \mathbf{b}_j}^k \frac{d^k \max\{w, 1\}^k}{\min\{u, 1\}^{k/2}}
\end{aligned}$$

where, as noted above,  $\bar{y}_{\mathbf{b}_j}$  does not depend on  $x$ . Here  $C_{\mathbf{b}_1, \dots, \mathbf{b}_j}$  is some constant which depends only on the partition  $\{\mathbf{b}_1, \dots, \mathbf{b}_j\}$  and is independent of  $x$ . On the other hand, we can also obtain a simple lower bound on  $q(x)$ . Observe that  $q(x)$  is continuous and always positive. Recall that  $b = \sup_{z \in \mathcal{Z}} \|\mu_z\|$ . Thus,

$$\begin{aligned}
q(x) &= \int_{\mathcal{Z}} g(x|z) d\Pi(z) \\
&\geq \frac{1}{(2\pi)^{d/2} \sup_{z \in \mathcal{Z}} \det(\Sigma_z)^{\frac{1}{2}}} \int_{\mathcal{Z}} \exp\left(-\frac{1}{2} \sup_{z \in \mathcal{Z}} (x - \mu_z)^\top \Sigma_z^{-1} (x - \mu_z)\right) d\Pi(z) \\
&\geq \frac{1}{(2\pi)^{d/2} \sup_{z \in \mathcal{Z}} \det(\Sigma_z)^{\frac{1}{2}}} \int_{\mathcal{Z}} \exp\left(-\frac{1}{2} \sup_{z \in \mathcal{Z}} \|\Sigma_z^{-1}\| (\|x\|^2 + \|\mu_z\|^2)\right) d\Pi(z) \\
&\geq \frac{1}{(2\pi)^{d/2} \sup_{z \in \mathcal{Z}} \det(\Sigma_z)^{\frac{1}{2}}} \int_{\mathcal{Z}} \exp\left(-\frac{1}{2} \sup_{z \in \mathcal{Z}} \|\Sigma_z^{-1}\| (\|x\|^2 + b^2)\right) d\Pi(z) \\
&\geq \frac{1}{(2\pi)^{d/2} U} \exp\left(-\frac{V}{2} (\|x\|^2 + b^2)\right).
\end{aligned}$$

Therefore, if we set  $C := \max_{\mathbf{b}_1, \dots, \mathbf{b}_j} C_{\mathbf{b}_1, \dots, \mathbf{b}_j}$ , we obtain

$$|\partial_{\mathbf{a}}^k \log q(x)| \leq C^k B_k \frac{d^{2k} \max\{w, 1\}^k}{\min\{u, 1\}^{k/2}} U^k e^{k \frac{V}{2} (\|x\|^2 + b^2)}. \quad (62)$$

The upper bound above, though it depends only on parameters  $u, U, V, w$ , has an exponential dependency on  $x$ , which is not desirable. We next derive a more refined bound in  $x$ . For brevity of analysis, we re-express  $r$  (defined in (61)) to avoid empty partitions:

$$r_{\mathbf{b}_1, \dots, \mathbf{b}_k}(x) = q(x)^{-p} \prod_{j=1}^p \partial_{\mathbf{b}_j}^{|\mathbf{b}_j|} q(x), \text{ s.t. } |\mathbf{b}_{p+1}| = \dots = |\mathbf{b}_k| = 0.$$

Now, by the boundedness of  $\|\mu_z\|$  and  $\left\| \Sigma_z^{-1/2} \right\|$  on  $\mathcal{Z}$ , for each  $x$ , there exist (bounded)  $\bar{\Sigma}_{\mathbf{b}_j}$  and  $\bar{\mu}_{\mathbf{b}_j}$  such that,  $\forall z \in \mathcal{Z}$ ,

$$\sum_{\mathbf{b} \in [d]^{|\mathbf{b}_j|}} \left| \text{poly}_{|\mathbf{b}_j|} \left( \Sigma_z^{-\frac{1}{2}} (x - \mu_z) \right) \right| \leq \sum_{\mathbf{b} \in [d]^{|\mathbf{b}_j|}} \left| \text{poly}_{|\mathbf{b}_j|} \left( \bar{\Sigma}_{\mathbf{b}_j}^{-\frac{1}{2}} (x - \bar{\mu}_{\mathbf{b}_j}) \right) \right| < \infty.$$

Then, following from (59), we obtain

$$\begin{aligned}
|r_{\mathbf{b}_1, \dots, \mathbf{b}_k}(x)| &= q(x)^{-p} \left| \prod_{j=1}^p \partial_{\mathbf{b}_j}^{|\mathbf{b}_j|} q(x) \right| \leq q(x)^{-p} \prod_{j=1}^p \left| \partial_{\mathbf{b}_j}^{|\mathbf{b}_j|} q(x) \right| \\
&\leq \frac{(d \max\{w, 1\})^{\sum_{j=1}^p |\mathbf{b}_j|}}{u^{p/2}} \times \\
&\quad \prod_{j=1}^p \frac{\int \det(\Sigma_z)^{-\frac{1}{2}} \sum_{\mathbf{c}_j \in [d]^{|\mathbf{b}_j|}} \left| \text{poly}_{|\mathbf{b}_j|} \left( \Sigma_z^{-\frac{1}{2}} (x - \mu_z) \right) \right| \phi \left( \Sigma_z^{-\frac{1}{2}} (x - \mu_z) \right) d\Pi(z)}{\int \det(\Sigma_z)^{-\frac{1}{2}} \phi \left( \Sigma_z^{-\frac{1}{2}} (x - \mu_z) \right) d\Pi(z)} \\
&\leq \frac{(d \max\{w, 1\})^k}{\min\{1, u\}^{k/2}} \times \\
&\quad \prod_{j=1}^p \frac{\sum_{\mathbf{c}_j \in [d]^{|\mathbf{b}_j|}} \left| \text{poly}_{|\mathbf{b}_j|} \left( \bar{\Sigma}_{\mathbf{b}_j}^{-\frac{1}{2}} (x - \bar{\mu}_{\mathbf{b}_j}) \right) \right| \left( \int \det(\Sigma_z)^{-\frac{1}{2}} \phi \left( \Sigma_z^{-\frac{1}{2}} (x - \mu_z) \right) d\Pi(z) \right)}{\int \det(\Sigma_z)^{-\frac{1}{2}} \phi \left( \Sigma_z^{-\frac{1}{2}} (x - \mu_z) \right) d\Pi(z)}
\end{aligned}$$

$$= \frac{(d \max\{w, 1\})^k}{\min\{1, u\}^{k/2}} \prod_{j=1}^p \sum_{\mathbf{c}_j \in [d]^{|\mathbf{b}_j|}} \left| \text{poly}_{|\mathbf{b}_j|} \left( \bar{\Sigma}_{\mathbf{b}_j}^{-\frac{1}{2}} (x - \bar{\mu}_{\mathbf{b}_j}) \right) \right|$$

Note that for each  $j$ , the number of terms in the summation above is upper-bounded by  $d^{|\mathbf{b}_j|}$ . Thus, expanding the product of summations would result in no more than  $\prod_{j=1}^p d^{|\mathbf{b}_j|} = d^k$  terms. Also, since  $|\text{poly}_{k_1}(y)| \cdot |\text{poly}_{k_2}(y)| = |\text{poly}_{k_1+k_2}(y)|$ , and since any  $\bar{\Sigma}_{\mathbf{b}_j}^{-\frac{1}{2}}(x - \bar{\mu}_{\mathbf{b}_j})$  is linear in  $x$  and independent in  $z$ , each product term is a  $k$ -th order polynomial in  $x$ . Therefore, we obtain

$$|r_{\mathbf{b}_1, \dots, \mathbf{b}_k}(x)| \leq \frac{d^{2k} \max\{w, 1\}^k}{\min\{1, u\}^{k/2}} \max_{\mathbf{c}_j \in [d]^{|\mathbf{b}_j|}, \forall j=1, \dots, p} |\text{poly}_k(x)|$$

and thus

$$|\partial_{\mathbf{a}}^k \log q(x)| \leq B_k \frac{d^{2k} \max\{w, 1\}^k}{\min\{1, u\}^{k/2}} \max_{\mathbf{b}_1, \dots, \mathbf{b}_k} \max_{\mathbf{c}_j \in [d]^{|\mathbf{b}_j|}, \forall j=1, \dots, p} |\text{poly}_k(x)|. \quad (63)$$

We have thus identified an upper bound on  $|\partial_{\mathbf{a}}^k \log q(x)|$  which is polynomial in  $x$ . The proof is now complete by combining (62) and (63).

## H.2 PROOF OF LEMMA 14

We first identify  $u, U, V, w$  for  $\Sigma_{t,n}$  such that they are independent of  $T$  and  $k$  for all  $t \geq 1$ . Fix  $t \geq 1$ . We use the fact that  $\Sigma_{t,n} = \bar{\alpha}_t \Sigma_{0,n} + (1 - \bar{\alpha}_t) I_d$ . If we let  $\lambda_{n,1} \geq \dots \geq \lambda_{n,d} > 0$  as the eigenvalues of  $\Sigma_{0,n}$  (which do not depend on  $T$ ), the eigenvalues of  $\Sigma_{t,n}$  are  $\{\bar{\alpha}_t \lambda_{n,i} + (1 - \bar{\alpha}_t)\}_{i=1}^d$ . Therefore, for any  $n = 1, \dots, N$  and  $t \geq 1$ ,

$$(u :=) \prod_{i=1}^d \min\{\min_n \lambda_{n,i}, 1\} \leq \det(\Sigma_{t,n}) \leq \prod_{i=1}^d \max\{\max_n \lambda_{n,i}, 1\} (= U).$$

Also, following from (45), we have  $V := \frac{1}{\min\{1, \min_n \lambda_{n,d}\}}$ . Next, write the eigen-decomposition as  $\Sigma_{0,n} = Q_n \text{diag}(\lambda_{n,1}, \dots, \lambda_{n,d}) Q_n^T$ , where  $Q_n$  here is an orthonormal matrix (that does not depend on  $T$ ). Then, for any  $t \geq 1$ ,

$$\begin{aligned} \Sigma_{t,n}^{-\frac{1}{2}} &= Q_n (\bar{\alpha}_t \text{diag}(\lambda_{n,1}, \dots, \lambda_{n,d}) + (1 - \bar{\alpha}_t) I_d)^{-\frac{1}{2}} Q_n^T \\ &= Q_n \text{diag}((\bar{\alpha}_t \lambda_{n,1} + (1 - \bar{\alpha}_t))^{-\frac{1}{2}}, \dots, (\bar{\alpha}_t \lambda_{n,d} + (1 - \bar{\alpha}_t))^{-\frac{1}{2}}) Q_n^T \end{aligned}$$

and thus, for all  $t \geq 1$ ,

$$\begin{aligned} [\Sigma_{t,n}^{-\frac{1}{2}}]^{ij} &= \sum_{k=1}^d (\bar{\alpha}_t \lambda_{n,k} + (1 - \bar{\alpha}_t))^{-\frac{1}{2}} Q_n^{ik} Q_n^{kj} \\ &\leq (\min\{1, \min_n \lambda_{n,d}\})^{-\frac{1}{2}} \max_{n \in [N], i, j \in [d]} \left| \sum_{k=1}^d Q_n^{ik} Q_n^{kj} \right| =: w. \end{aligned}$$

Since the identified  $u, U, V, w$  are all independent of  $T$  and  $k$ , by Lemma 13 we have obtained an upper bound on  $|\partial_{\mathbf{a}}^k \log q(x)|$  for any fixed  $x$  which is independent of  $T$ . Thus,

$$\begin{aligned} (1 - \alpha_t)^{k/2} \mathbb{E}_{X_t \sim Q_t} |\partial_{\mathbf{a}}^k \log q_t(X_t)|, \quad (1 - \alpha_t)^{k/2} \mathbb{E}_{X_t \sim Q_t} |\partial_{\mathbf{a}}^k \log q_{t-1}(\mu_t(X_t))| \\ = \tilde{O}\left((1 - \alpha_t)^{k/2}\right) = \tilde{O}\left(\frac{1}{T^{k/2}}\right). \end{aligned}$$

Hence, we have shown Assumption 5.

## H.3 PROOF OF LEMMA 15

Fix  $t \geq 1$ . We will draw some notations introduced in Lemma 13. Specifically, we recall from (61) that

$$\partial_{\mathbf{a}}^p \log q_t(x_t) = q_t(x_t)^{-p} \sum_{\mathbf{b}_1, \dots, \mathbf{b}_p} \prod_{j=1}^p \partial_{\mathbf{b}_j}^{|\mathbf{b}_j|} q_t(x_t)$$

$$\begin{aligned}
&= q_t(x_t)^{-p} \sum_{\mathbf{b}_1, \dots, \mathbf{b}_p} \prod_{j=1}^p \int_{x_0} q_{t|0}(x_t|x_0) \text{poly}_{|\mathbf{b}_j|} \left( \frac{x_t - \sqrt{\bar{\alpha}_t} x_0}{1 - \bar{\alpha}_t} \right) dQ_0(x_0) \\
&= \sum_{\mathbf{b}_1, \dots, \mathbf{b}_p} \frac{1}{(1 - \bar{\alpha}_t)^{\frac{p\ell}{2}}} \prod_{j=1}^p \int_{x_0} \text{poly}_{|\mathbf{b}_j|} \left( \frac{x_t - \sqrt{\bar{\alpha}_t} x_0}{\sqrt{1 - \bar{\alpha}_t}} \right) dQ_{0|t}(x_0|x_t) \quad (64)
\end{aligned}$$

in which we have defined  $\text{poly}_k(y)$  as a  $k$ -th order polynomial function in  $y_1, \dots, y_d$ . Recall that here  $\{\mathbf{b}_1, \dots, \mathbf{b}_p\}$  is some (possibly empty) partition of  $\mathbf{a}$ , i.e.,  $\sum_j \mathbf{b}_j = \mathbf{a}$  and  $\sum_j |\mathbf{b}_j| = p$ .

Thus,

$$\begin{aligned}
&\mathbb{E}_{X_t \sim Q_t} |\partial_{\mathbf{a}}^p \log q_t(X_t)|^\ell \\
&\leq \frac{1}{(1 - \bar{\alpha}_t)^{\frac{p\ell}{2}}} p^\ell \sum_{\mathbf{b}_1, \dots, \mathbf{b}_p} \mathbb{E}_{X_t \sim Q_t} \left[ \prod_{j=1}^p \left| \int_{x_0} \text{poly}_{|\mathbf{b}_j|} \left( \frac{X_t - \sqrt{\bar{\alpha}_t} x_0}{\sqrt{1 - \bar{\alpha}_t}} \right) dQ_{0|t}(x_0|X_t) \right|^\ell \right] \\
&\stackrel{(i)}{\leq} \frac{1}{(1 - \bar{\alpha}_t)^{\frac{p\ell}{2}}} p^\ell \sum_{\mathbf{b}_1, \dots, \mathbf{b}_p} \prod_{j=1}^p \left( \mathbb{E}_{X_t \sim Q_t} \left| \int_{x_0} \text{poly}_{|\mathbf{b}_j|} \left( \frac{X_t - \sqrt{\bar{\alpha}_t} x_0}{\sqrt{1 - \bar{\alpha}_t}} \right) dQ_{0|t}(x_0|X_t) \right|^{\frac{p\ell}{|\mathbf{b}_j|}} \right)^{\frac{|\mathbf{b}_j|}{p}} \\
&\stackrel{(ii)}{\leq} \frac{1}{(1 - \bar{\alpha}_t)^{\frac{p\ell}{2}}} p^\ell \sum_{\mathbf{b}_1, \dots, \mathbf{b}_p} \prod_{j=1}^p \left( \mathbb{E}_{X_0, X_t \sim Q_{0,t}} \left| \text{poly}_{|\mathbf{b}_j|} \left( \frac{X_t - \sqrt{\bar{\alpha}_t} X_0}{\sqrt{1 - \bar{\alpha}_t}} \right) \right|^{\frac{p\ell}{|\mathbf{b}_j|}} \right)^{\frac{|\mathbf{b}_j|}{p}} \\
&= \frac{1}{(1 - \bar{\alpha}_t)^{\frac{p\ell}{2}}} p^\ell \sum_{\mathbf{b}_1, \dots, \mathbf{b}_p} \prod_{j=1}^p \left( \mathbb{E} \left| \text{poly}_{|\mathbf{b}_j|}(Z) \right|^{\frac{p\ell}{|\mathbf{b}_j|}} \right)^{\frac{|\mathbf{b}_j|}{p}} \\
&\lesssim \frac{d^{\frac{p\ell}{2}}}{(1 - \bar{\alpha}_t)^{\frac{p\ell}{2}}}
\end{aligned}$$

where  $Z \sim \mathcal{N}(0, I_d)$  is a standard Gaussian random variable (that does not depend on  $T$  here) and any  $r$ -th order of polynomial of  $Z_1, \dots, Z_d$  has finite expectation (that does not depend on  $T$  and with at most  $d^{r/2}$  dimensional dependency). Here (i) holds by Hölder's inequality, and (ii) holds by Jensen's inequality since  $p\ell/|\mathbf{b}_j| \geq 1$  for all  $\mathbf{b}_j$  and  $\ell \geq 1$ . The proof is now complete.

#### H.4 PROOF OF LEMMA 16

Fix  $t \geq 2$ . We first introduce the following notations. Write  $\mu_t = \mu_t(x_t)$ . Let  $Q_{\mu_t}$  be the distribution of  $\mu_t(X_t)$  where  $X_t \sim Q_t$ , and let  $q_{\mu_t}$  be the corresponding p.d.f. (w.r.t. the Lebesgue measure). Let  $Q_{\mu_t, x_0}$  be the joint distribution of  $\mu_t$  and  $x_0$ .

Now, we can re-write the integral as

$$\begin{aligned}
&\int_{x_0, x_t} \|\mu_t(x_t) - \sqrt{\bar{\alpha}_{t-1}} x_0\|^p dQ_{0|t-1}(x_0|\mu_t(x_t)) dQ_t(x_t) \\
&= \int_{x_0, \mu_t} \|\mu_t - \sqrt{\bar{\alpha}_{t-1}} x_0\|^p dQ_{0|t-1}(x_0|\mu_t) dQ_{\mu_t}(\mu_t) \\
&= \int_{x_0, \mu_t} \|\mu_t - \sqrt{\bar{\alpha}_{t-1}} x_0\|^p \frac{q_{\mu_t}(\mu_t)}{q_{t-1}(\mu_t)} dQ_{0|t-1}(x_0|\mu_t) dQ_{t-1}(\mu_t) \\
&\leq \sqrt{\int_{x_0, \mu_t} \|\mu_t - \sqrt{\bar{\alpha}_{t-1}} x_0\|^{2p} dQ_{0|t-1}(x_0|\mu_t) dQ_{t-1}(\mu_t)} \\
&\quad \times \sqrt{\int_{x_0, \mu_t} \left( \frac{q_{\mu_t}(\mu_t)}{q_{t-1}(\mu_t)} \right)^2 dQ_{0|t-1}(x_0|\mu_t) dQ_{t-1}(\mu_t)} \quad (65)
\end{aligned}$$

where the last line follows from Cauchy-Schwartz inequality.

Now, for the first term of (65) we recovered the matched moment, and we have

$$\begin{aligned}
& \sqrt{\int_{x_0, \mu_t} \|\mu_t - \sqrt{\bar{\alpha}_{t-1}}x_0\|^{2p} dQ_{0|t-1}(x_0|\mu_t)dQ_{t-1}(\mu_t)} \\
&= \sqrt{\int_{x_0, x_{t-1}} \|x_{t-1} - \sqrt{\bar{\alpha}_{t-1}}x_0\|^{2p} dQ_{0,t-1}(x_0, x_{t-1})} \\
&= (1 - \bar{\alpha}_{t-1})^{\frac{p}{2}} \sqrt{\int_{x_0, x_{t-1}} \left\| \frac{x_{t-1} - \sqrt{\bar{\alpha}_{t-1}}x_0}{\sqrt{1 - \bar{\alpha}_{t-1}}} \right\|^{2p} dQ_{0,t-1}(x_0, x_{t-1})} \\
&= (1 - \bar{\alpha}_{t-1})^{\frac{p}{2}} \sqrt{\mathbb{E} \|Z\|^{2p}} \lesssim d^{\frac{p}{2}} (1 - \bar{\alpha}_{t-1})^{\frac{p}{2}}
\end{aligned}$$

where  $Z \sim \mathcal{N}(0, I_d)$  is a Gaussian random variable.

Now we upper bound the second term in (65), whose square is equal to

$$\begin{aligned}
& \int_{x_0, \mu_t} \left( \frac{q_{\mu_t}(\mu_t)}{q_{t-1}(\mu_t)} \right)^2 dQ_{0|t-1}(x_0|\mu_t)dQ_{t-1}(\mu_t) \\
&= \int_{x_{t-1}} \left( \frac{q_{\mu_t}(x_{t-1})}{q_{t-1}(x_{t-1})} \right)^2 q_{t-1}(x_{t-1}) dx_{t-1} \\
&= 1 + \chi^2(Q_{\mu_t} || Q_{t-1}) \\
&\stackrel{(i)}{\leq} 1 + \chi^2(Q_{\mu_t, x_0} || Q_{t-1, 0}) \\
&= \int_{x_0} \left( \int_{\mu_t} \left( \frac{q_{\mu_t|x_0}(\mu_t|x_0)}{q_{t-1|0}(\mu_t|x_0)} \right)^2 q_{t-1|0}(\mu_t|x_0) d\mu_t \right) dQ_0(x_0) \\
&= \int_{x_0} \left( \int_{x_t} \frac{(q_{t|0}(x_t|x_0))^2}{q_{t-1|0}(\mu_t(x_t)|x_0)} \det \left( \frac{d\mu_t(x_t)}{dx_t} \right)^{-1} dx_t \right) dQ_0(x_0) \\
&\stackrel{(ii)}{\leq} \sqrt{\int_{x_0, x_t} \left( \frac{q_{t|0}(x_t|x_0)}{q_{t-1|0}(\mu_t(x_t)|x_0)} \right)^2 dQ_{t,0}(x_t, x_0)} \times \\
&\quad \sqrt{\int_{x_0, x_t} \det \left( \frac{d\mu_t(x_t)}{dx_t} \right)^{-2} dQ_{t,0}(x_t, x_0)}
\end{aligned}$$

where  $\chi^2(P||Q)$  is the chi-squared divergence between  $P$  and  $Q$ . Here (i) follows from the data processing inequality for f-divergence, and (ii) again follows from Cauchy-Schwartz inequality. We can calculate the determinant term above as

$$\begin{aligned}
\det \left( \frac{d\mu_t}{dx_t} \right)^{-2} &= \det \left( \frac{1}{\sqrt{\alpha_t}} I_d + \frac{1 - \alpha_t}{\sqrt{\alpha_t}} \nabla^2 \log q_t(x_t) \right)^{-2} \\
&= \left( \frac{1}{\alpha_t^{\frac{d}{2}}} (1 + (1 - \alpha_t) \text{Tr}(\nabla^2 \log q_t(x_t)) + \epsilon_T(x_t)) \right)^{-2} \\
&\leq \alpha_t^{\frac{d}{2}} (1 - 2(1 - \alpha_t) \text{Tr}(\nabla^2 \log q_t(x_t)) + \epsilon_T(x_t))
\end{aligned}$$

where we denote the residual terms as  $\epsilon_T(x_t) := \sum_{p=2}^{\infty} (1 - \alpha_t)^p \sum_{I:|I|=p} c_I \prod_{(i,j) \in I} \partial_{ij}^2 \log q_t(x_t)$ , where  $c_I$  is some coefficient that does not depend on  $T$ . Since from Lemma 15,

$$\mathbb{E}_{X_t \sim Q_t} |\partial_{ij}^2 \log q_t(X_t)|^\ell = \tilde{O} \left( \frac{1}{(1 - \bar{\alpha}_t)^\ell} \right), \quad \forall i, j \in [d], \forall \ell \geq 1,$$

and note that  $\frac{1 - \alpha_t}{1 - \bar{\alpha}_t} = \tilde{O} \left( \frac{\log T}{T} \right)$  with the  $\alpha_t$  in (10), we have that

$$\mathbb{E}_{X_t \sim Q_t} |\epsilon_T(X_t)| \leq \sum_{p=2}^{\infty} (1 - \alpha_t)^p \sum_{I:|I|=p} c_I \mathbb{E}_{X_t \sim Q_t} \prod_{(i,j) \in I} |\partial_{ij}^2 \log q_t(X_t)|$$

$$\begin{aligned}
&\leq \sum_{p=2}^{\infty} (1-\alpha_t)^p \sum_{I:|I|=p} c_I \prod_{(i,j) \in I} \left( \mathbb{E}_{X_t \sim Q_t} |\partial_{ij}^2 \log q_t(X_t)|^p \right)^{\frac{1}{p}} \\
&= \sum_{p=2}^{\infty} \tilde{O} \left( \frac{(1-\alpha_t)^p}{(1-\bar{\alpha}_t)^p} \right) \\
&= \tilde{O} \left( \frac{(\log T)^2}{T^2} \right),
\end{aligned}$$

and thus

$$\mathbb{E}_{X_t \sim Q_t} \det \left( \frac{d\mu_t}{dx_t} \right)^{-2} = \alpha_t^{\frac{d}{2}} + \tilde{O} \left( \frac{\log T}{T} \right) \leq 1 + \tilde{O} \left( \frac{\log T}{T} \right).$$

Also, since

$$\begin{aligned}
&\left( \frac{q_{t|0}(x_t|x_0)}{q_{t-1|0}(\mu_t|x_0)} \right)^2 = \frac{\frac{1}{(1-\bar{\alpha}_t)^d} \exp \left( -\frac{\|x_t - \sqrt{\bar{\alpha}_t} x_0\|^2}{1-\bar{\alpha}_t} \right)}{\frac{1}{(1-\bar{\alpha}_{t-1})^d} \exp \left( -\frac{\|x_t + (1-\alpha_t)\nabla \log q_t(x_t) - \sqrt{\bar{\alpha}_t} x_0\|^2}{\alpha_t - \bar{\alpha}_t} \right)} \\
&= \left( \frac{1-\bar{\alpha}_{t-1}}{1-\bar{\alpha}_t} \right)^d \exp \left( \|x_t - \sqrt{\bar{\alpha}_t} x_0\|^2 \left( \frac{1}{\alpha_t - \bar{\alpha}_t} - \frac{1}{1-\bar{\alpha}_t} \right) \right) \times \\
&\quad \exp \left( \frac{2(1-\alpha_t)\nabla \log q_t(x_t)^\top (x_t - \sqrt{\bar{\alpha}_t} x_0) + (1-\alpha_t)^2 \|\nabla \log q_t(x_t)\|^2}{\alpha_t - \bar{\alpha}_t} \right) \\
&\stackrel{(iii)}{\leq} \exp \left( \left\| \frac{x_t - \sqrt{\bar{\alpha}_t} x_0}{\sqrt{1-\bar{\alpha}_t}} \right\|^2 \frac{1-\alpha_t}{\alpha_t - \bar{\alpha}_t} \right) \times \\
&\quad \exp \left( \frac{2(1-\alpha_t)\nabla \log q_t(x_t)^\top (x_t - \sqrt{\bar{\alpha}_t} x_0) + (1-\alpha_t)^2 \|\nabla \log q_t(x_t)\|^2}{\alpha_t - \bar{\alpha}_t} \right) \\
&\stackrel{(iv)}{=} \exp \left( \left\| \frac{x_t - \sqrt{\bar{\alpha}_t} x_0}{\sqrt{1-\bar{\alpha}_t}} \right\|^2 \frac{1-\alpha_t}{\alpha_t - \bar{\alpha}_t} \right) \times \\
&\quad \left( 1 + \tilde{O} \left( \frac{(1-\alpha_t)\nabla \log q_t(x_t)^\top (x_t - \sqrt{\bar{\alpha}_t} x_0) + (1-\alpha_t)^2 \|\nabla \log q_t(x_t)\|^2}{\alpha_t - \bar{\alpha}_t} \right) \right)
\end{aligned}$$

where (iii) follows because  $\frac{1-\bar{\alpha}_{t-1}}{1-\bar{\alpha}_t} < 1$ , and (iv) follows because  $e^z = 1 + \tilde{O}(z)$  when  $z \rightarrow 0$  and because  $\frac{1-\alpha_t}{\alpha_t - \bar{\alpha}_t}, \frac{1-\alpha_t}{1-\bar{\alpha}_t} = \tilde{O} \left( \frac{\log T}{T} \right)$  with the  $\alpha_t$  in (10). Thus,

$$\begin{aligned}
&\mathbb{E}_{X_t, X_0 \sim Q_{t,0}} \left( \frac{q_{t|0}(X_t|X_0)}{q_{t-1|0}(\mu_t(X_t)|X_0)} \right)^2 \\
&\leq \sqrt{\mathbb{E}_{X_t, X_0 \sim Q_{t,0}} \exp \left( 2 \left\| \frac{X_t - \sqrt{\bar{\alpha}_t} X_0}{\sqrt{1-\bar{\alpha}_t}} \right\|^2 \frac{1-\alpha_t}{\alpha_t - \bar{\alpha}_t} \right)} \times \\
&\quad \sqrt{1 + \tilde{O} \left( \mathbb{E}_{X_t, X_0 \sim Q_{t,0}} \left[ \frac{(1-\alpha_t) \|\nabla \log q_t(x_t)\| \|x_t - \sqrt{\bar{\alpha}_t} x_0\| + (1-\alpha_t)^2 \|\nabla \log q_t(x_t)\|^2}{\alpha_t - \bar{\alpha}_t} \right] \right)} \\
&\stackrel{(v)}{=} \sqrt{\mathbb{E}_{X_t, X_0 \sim Q_{t,0}} \exp \left( 2 \left\| \frac{X_t - \sqrt{\bar{\alpha}_t} X_0}{\sqrt{1-\bar{\alpha}_t}} \right\|^2 \frac{1-\alpha_t}{\alpha_t - \bar{\alpha}_t} \right)} \times \left( 1 + \tilde{O} \left( \frac{\log T}{T} \right) \right)
\end{aligned}$$

where (v) follows from Lemma 15 and Cauchy-Schwartz inequality, and

$$\mathbb{E}_{X_t, X_0 \sim Q_{t,0}} \exp \left( 2 \left\| \frac{X_t - \sqrt{\bar{\alpha}_t} X_0}{\sqrt{1-\bar{\alpha}_t}} \right\|^2 \frac{1-\alpha_t}{\alpha_t - \bar{\alpha}_t} \right)$$

$$\begin{aligned}
&= \frac{1}{(2\pi)^{\frac{d}{2}}} \int_z e^{2\frac{1-\alpha_t}{1-\bar{\alpha}_t} \|z\|^2 - \frac{1}{2} \|z\|^2} dz \\
&= \frac{1}{(2\pi)^{\frac{d}{2}}} \int_z e^{-\frac{1}{2} \|z\|^2 (1 + \tilde{O}(\log T/T))} dz \\
&= 1 + \tilde{O}\left(\frac{\log T}{T}\right).
\end{aligned}$$

Therefore, we arrive at a bound for the second term in (65):

$$\sqrt{\int_{x_0, \mu_t} \left(\frac{q_{\mu_t}(\mu_t)}{q_{t-1}(\mu_t)}\right)^2 dQ_{0|t-1}(x_0|\mu_t) dQ_{t-1}(\mu_t)} \leq 1 + \tilde{O}\left(\frac{\log T}{T}\right).$$

and the lemma follows immediately.

### H.5 PROOF OF LEMMA 17

Fix  $t \geq 2$ . From (64), we also have

$$\begin{aligned}
&\mathbb{E}_{X_t \sim Q_t} |\partial_{\mathbf{a}}^p \log q_{t-1}(\mu_t(X_t))|^\ell \\
&\leq \frac{1}{(1 - \bar{\alpha}_{t-1})^{\frac{p\ell}{2}}} \sum_{\mathbf{b}_1, \dots, \mathbf{b}_p} \mathbb{E}_{X_t \sim Q_t} \left[ \prod_{j=1}^p \left| \int_{x_0} \text{poly}_{|\mathbf{b}_j|} \left( \frac{\mu_t(X_t) - \sqrt{\bar{\alpha}_{t-1}} x_0}{\sqrt{1 - \bar{\alpha}_{t-1}}} \right) dQ_{0|t-1}(x_0|\mu_t(X_t)) \right|^\ell \right] \\
&\leq \frac{1}{(1 - \bar{\alpha}_{t-1})^{\frac{p\ell}{2}}} \sum_{\mathbf{b}_1, \dots, \mathbf{b}_p} \prod_{j=1}^p \left( \mathbb{E}_{X_t \sim Q_t} \left| \int_{x_0} \text{poly}_{|\mathbf{b}_j|} \left( \frac{\mu_t(X_t) - \sqrt{\bar{\alpha}_{t-1}} x_0}{\sqrt{1 - \bar{\alpha}_{t-1}}} \right) dQ_{0|t-1}(x_0|\mu_t(X_t)) \right|^{\frac{p\ell}{|\mathbf{b}_j|}} \right)^{\frac{|\mathbf{b}_j|}{p}} \\
&\leq \frac{1}{(1 - \bar{\alpha}_{t-1})^{\frac{p\ell}{2}}} \sum_{\mathbf{b}_1, \dots, \mathbf{b}_p} \prod_{j=1}^p \left( \mathbb{E}_{X_t \sim Q_t} \int_{x_0} \left| \text{poly}_{|\mathbf{b}_j|} \left( \frac{\mu_t(X_t) - \sqrt{\bar{\alpha}_{t-1}} x_0}{\sqrt{1 - \bar{\alpha}_{t-1}}} \right) \right|^{\frac{p\ell}{|\mathbf{b}_j|}} dQ_{0|t-1}(x_0|\mu_t(X_t)) \right)^{\frac{|\mathbf{b}_j|}{p}} \\
&\leq \frac{1}{(1 - \bar{\alpha}_{t-1})^{\frac{p\ell}{2}}} \sum_{\mathbf{b}_1, \dots, \mathbf{b}_p} \max_{j \in [p]} \mathbb{E}_{X_t \sim Q_t} \int_{x_0} \left| \text{poly}_{p\ell} \left( \frac{\mu_t(X_t) - \sqrt{\bar{\alpha}_{t-1}} x_0}{\sqrt{1 - \bar{\alpha}_{t-1}}} \right) \right| dQ_{0|t-1}(x_0|\mu_t(X_t)) \\
&\lesssim \frac{1}{(1 - \bar{\alpha}_{t-1})^{\frac{p\ell}{2}}} \cdot \mathbb{E}_{X_t \sim Q_t} \int_{x_0} \left\| \frac{\mu_t(X_t) - \sqrt{\bar{\alpha}_{t-1}} x_0}{\sqrt{1 - \bar{\alpha}_{t-1}}} \right\|^{p\ell} dQ_{0|t-1}(x_0|\mu_t(X_t)) \\
&\lesssim \frac{d^{\frac{p\ell}{2}}}{(1 - \bar{\alpha}_{t-1})^{\frac{p\ell}{2}}}
\end{aligned}$$

where the last line follows from Lemma 16. Now, together with Lemma 15, Assumption 5 is established noting that  $\frac{1-\alpha_t}{1-\bar{\alpha}_{t-1}} = \tilde{O}\left(\frac{\log T}{T}\right) = \tilde{O}(1 - \alpha_t)$  for all  $t \geq 2$ .

### H.6 PROOF OF LEMMA 18

Recall the expansion of  $\zeta'_{1,0}$  in (57). As in the proof of Lemma 11, with the choice of  $\mu_1$  and  $\Sigma_1$ , we still have

$$\mathbb{E}_{X_0 \sim P'_{0|1}} [T_1] = \mathbb{E}_{X_0 \sim Q_{0|1}} [T_1],$$

$$\mathbb{E}_{X_0 \sim P'_{0|1}} [T'_2] = \mathbb{E}_{X_0 \sim Q_{0|1}} [T'_2].$$

Define  $T'_3 := \frac{1}{3!} \sum_{i,j,k=1}^d \partial_{ijk}^3 \log q_0(\mu_1^*)(x_0^i - \mu_1^i)(x_0^j - \mu_1^j)(x_0^k - \mu_1^k)$ . Here  $\mu_1^* = \mu_1^*(x_1, x_0)$  is a function of both  $x_1$  and  $x_0$ . A useful result from Lemma 15 is that, with the  $\alpha_t$  in (10), we have,  $\forall i, j, k \in [d]$  and  $\ell \geq 1$ ,

$$(1 - \alpha_1)^\ell \mathbb{E}_{X_1 \sim Q_1} |\partial_{ij}^2 \log q_1(X_1)|^\ell \lesssim \frac{(1 - \alpha_1)^\ell d^\ell}{(1 - \bar{\alpha}_1)^\ell} = d^\ell, \quad (66)$$

$$(1 - \alpha_1)^3 \mathbb{E}_{X_1 \sim Q_1} |\partial_{ijk}^3 \log q_1(X_1)|^2 \lesssim \frac{(1 - \alpha_1)^3 d^3}{(1 - \bar{\alpha}_1)^3} = d^3. \quad (67)$$



3348 First, using Lemma 8, we have that

$$\begin{aligned}
3349 & \\
3350 & \mathbb{E}_{X_0, X_1 \sim Q_{0,1}} [T'_3] \\
3351 & = \frac{(1 - \alpha_1)^3}{3! \alpha_1^{3/2}} \sum_{i,j,k=1}^d \mathbb{E}_{X_0, X_1 \sim Q_{0,1}} [\partial_{ijk}^3 \log q_0(\mu_1^*(X_1, X_0)) \partial_{ijk}^3 \log q_1(X_1)] \\
3352 & \\
3353 & \\
3354 & \leq \frac{(1 - \alpha_1)^3}{3! \alpha_1^{3/2}} \sqrt{\mathbb{E}_{X_0, X_1 \sim Q_{0,1}} \sum_{i,j,k=1}^d (\partial_{ijk}^3 \log q_0(\mu_1^*(X_1, X_0)))^2} \sqrt{\mathbb{E}_{X_1 \sim Q_1} \sum_{i,j,k=1}^d (\partial_{ijk}^3 \log q_1(X_1))^2} \\
3355 & \\
3356 & \\
3357 & \\
3358 & \leq \frac{(1 - \alpha_1)^3}{3! \alpha_1^{3/2}} dM \sqrt{\mathbb{E}_{X_1 \sim Q_1} \sum_{i,j,k=1}^d (\partial_{ijk}^3 \log q_1(X_1))^2}. \\
3359 & \\
3360 &
\end{aligned}$$

3361 Here in the last line we have used a similar technique in (55), which assumes that  $\nabla^2 \log q_0$  is 2-norm  
3362  $M$ -Lipschitz. Now, from (67) we have

$$\mathbb{E}_{X_0, X_1 \sim Q_{0,1}} [T'_3] \lesssim \frac{(1 - \alpha_1)^{3/2}}{3! \alpha_1^{3/2}} d^4 M.$$

3366 Also,

$$\begin{aligned}
3367 & \\
3368 & \mathbb{E}_{\substack{X_0 \sim P'_{0|1} \\ X_1 \sim Q_1}} [T'_3] \\
3369 & \\
3370 & = \frac{1}{3!} \sum_{i,j,k=1}^d \mathbb{E}_{\substack{X_0 \sim P'_{0|1} \\ X_1 \sim Q_1}} \left[ \partial_{ijk}^3 \log q_0(\mu_1^*(X_1, X_0)) \prod_{c=i,j,k} (X_0^c - \mu_1^c(X_1)) \right] \\
3371 & \\
3372 & \\
3373 & \\
3374 & \stackrel{(i)}{\leq} \frac{1}{3!} dM \sqrt{\mathbb{E}_{\substack{X_0 \sim P'_{0|1} \\ X_1 \sim Q_1}} \|X_0 - \mu_1(X_1)\|^6} \\
3375 & \\
3376 & \\
3377 & \leq \frac{1}{3!} d^2 M \sqrt{\sum_{i=1}^d \mathbb{E}_{\substack{X_0 \sim P'_{0|1} \\ X_1 \sim Q_1}} (X_0^i - \mu_1(X_1)^i)^6} \\
3378 & \\
3379 & \\
3380 & \\
3381 & \stackrel{(ii)}{=} \frac{1}{3!} d^2 M \sqrt{\sum_{i=1}^d 15 \left( \frac{1 - \alpha_1}{\alpha_1} \right)^3 \mathbb{E}_{X_1 \sim Q_1} (1 + (1 - \alpha_1) \partial_{ii}^2 \log q_1(X_1))^3} \\
3382 & \\
3383 & \\
3384 & \stackrel{(iii)}{\lesssim} \frac{(1 - \alpha_1)^{3/2}}{3! \alpha_1^{3/2}} d^4 M \\
3385 & \\
3386 &
\end{aligned}$$

3387 where (i) holds with a similar technique in (55) assuming  $\nabla^2 \log q_0$  is  $M$ -Lipschitz, (ii) holds by  
3388 Lemma 7, and (iii) holds by (66). The proof is now complete.
